# Supplementary material for: GABAA receptor-mediated seizure liabilities: a mixed-methods screening approach
Source: PubMed Central journal article supplement (PMC10693519; doi:10.1007/s10565-023-09803-y), 2023-04-24
Supplement: 10565_2023_9803_MOESM1_ESM.pdf [file 10565_2023_9803_MOESM1_ESM.pdf]

## Supplementary Information

### **GABA<sub>A</sub> receptor-mediated seizure liabilities: A mixed-methods screening approach**

Konstantina Bampali (1), Filip Koniuszewski<sup>✉</sup> (1), Florian D. Vogel (1), Jure Fabjan (1), Christos Andronis (2), Eftychia Lekka (2), Vassilis Virvillis (2), Thomas Seidel (3), Annie Delaunois (4), Leandro Royer (4), Michael G. Rolf (5), Chiara Giuliano (6), Martin Traebert (7), Gautier Roussignol (8), Magali Fric-Bordat (8), Ludmilla Mazelin-Winum (8), Sharon D. Bryant (9), Thierry Langer (3), Margot Ernst<sup>✉\*</sup> (1)

(1) Department of Pathobiology of the Nervous System, Center for Brain Research, Medical University Vienna, Spitalgasse 4, 1090 Vienna, Austria

(2) Biovista, 34 Rodopoleos Street, 16777, Athens, Greece

(3) Department of Pharmaceutical Sciences, Division of Pharmaceutical Chemistry, University of Vienna, Josef-Holaubek-Platz 2, 1090 Vienna, Austria

(4) UCB Biopharma SRL, Chemin du Foriest, Braine-l'Alleud, Belgium

(5) Astra Zeneca, R&D Biopharmaceuticals, Pepparedsleden 1, 431 83 Mölndal, Sweden

(6) Astra Zeneca, R&D Biopharmaceuticals, Fleming Building (B623), Babraham Research Park, Babraham, Cambridgeshire CB22 3AT, United Kingdom

(7) Novartis Institutes for Biomedical Research, Fabrikstrasse 2, CH-4056, Basel, Switzerland

(8) Preclinical safety, Sanofi R & D, Montpellier, France

(9) Inte:Ligand GmbH, Mariahilferstrasse 74B/11 1070 Vienna, Austria

\*Corresponding author – main contact: [margot.ernst@meduniwien.ac.at](mailto:margot.ernst@meduniwien.ac.at), phone number: +43 1 40160 34065

<sup>✉</sup>These authors are shared corresponding authors

| Nr         | PDB ID           | Protein                     | Ligand                    | Subunits                               | Puthenkalam et al., 2016 | References            |                            |
|------------|------------------|-----------------------------|---------------------------|----------------------------------------|--------------------------|-----------------------|----------------------------|
| 1          | 5AFJ             | AChBP                       | fragment 1                | $\alpha 7$                             | 1                        | Spurny et al., 2015   |                            |
| 2          | 5VDH *           | Glycine                     | AM-3607                   | $\alpha 3+\alpha 3-$                   | -                        | Huang et al., 2017    |                            |
|            | 6HJX *           | ELIC                        | 2-Ethanesulfonic acid     |                                        | -                        | Henault et al., 2019  |                            |
| 3          | 6HUP             | GABA-A                      | GABA                      | $\beta 3+\alpha 1-$                    | Site 1                   | Masiulis et al., 2019 |                            |
|            |                  |                             | Diazepam                  | $\alpha 1+\gamma 2-$                   |                          |                       |                            |
|            | 6HUO             |                             | GABA                      | $\beta 3+\alpha 1-$                    |                          |                       |                            |
|            |                  |                             | Alprazolam                | $\alpha 1+\gamma 2-$                   |                          |                       |                            |
|            | 6HUK *           |                             | Bicuculline methochloride | $\beta 3+\alpha 1-$                    |                          |                       |                            |
|            | 6A96             |                             | GABA                      | $\beta 3+\alpha 5-$                    |                          |                       | Liu et al., 2018           |
|            | 6DW0, 6DW1       |                             | GABA                      | $\beta 1+\alpha 1-$                    |                          |                       | Phulera et al., 2018       |
|            | 6DW0, 6DW1       |                             | GABA                      | $\alpha 1+\beta 1-$                    |                          |                       |                            |
|            | 6D6T, 6D6U       |                             | GABA                      | $\beta 2+\alpha 1-$                    |                          |                       | Zhu et al., 2018           |
|            |                  |                             | Flumazenil                | $\alpha 1+\gamma 2-$                   |                          |                       |                            |
|            | 4COF             |                             | Benzamidine               | $\beta 3+\beta 3-$                     |                          |                       | Miller and Aricescu., 2014 |
|            | 6QFA             |                             | Histamine                 | $\beta 3+\beta 3-$                     |                          |                       | Uchanski et al., 2021      |
|            | 7PC0             |                             | alpha-Cobratoxin          | $\beta 3+\alpha 1-$                    |                          |                       | Kasaragod et al., 2022     |
|            | 7QN9, 7QN8, 7QNC |                             | histamine                 | $\beta 3+\beta 3-$                     |                          |                       | Sente et al., 2022         |
|            | 7QND, 7QNC       |                             | gaboxadol                 | $\delta+\beta 3-$                      |                          |                       | Sente et al., 2022         |
|            | 7QNB             |                             | GABA                      | $\beta 3+\gamma 2-$                    |                          |                       | Sente et al., 2022         |
|            | 7QNE             |                             | Ro15-1413                 | $\alpha 1+\gamma 2-$                   |                          |                       | Sente et al., 2022         |
| 4TWF, 4TWD | ELIC             | memantine, bromemantine     | Ulens et al., 2014        |                                        |                          |                       |                            |
| 4F8H *     | GLIC             | Ketamine                    | Site 2                    | Pan et al., 2012a                      |                          |                       |                            |
| 4          | 2YNG *           | ELIC                        | Ba-Atom                   | Site 3                                 | Zimmermann et al., 2012  |                       |                            |
| 5          | 5LG3 *           | ELIC                        | Chlorpromazine            | $\beta 1-$                             | Site 5                   | Nys et al., 2016      |                            |
|            | 5LID             |                             | Brompromazine             |                                        |                          |                       |                            |
|            | 3ZKR             |                             | Br- atom                  |                                        |                          |                       |                            |
| 6          | 5MUR *           | GLIC                        | Propofol                  | Site 8                                 | Sauguet et al., 2018     |                       |                            |
|            | 3P4W *           | GLIC                        | Desflurane                | Site 8                                 | Nury et al., 2011        |                       |                            |
| L          | 6D6T, 6D6U *     | GABA-A                      | Cholesterol               | $\beta 2+$                             | -                        | Zhu et al., 2018      |                            |
| 7          | 6HUP *           | GABA-A                      | Diazepam                  | $\beta 3+\alpha 1-$                    | Site 7                   | Masiulis et al., 2019 |                            |
|            | 5MVM             | GLIC                        | Propofol                  |                                        |                          | Fourati et al., 2018  |                            |
|            | 4HFE             | GLIC                        | Ethanol                   |                                        |                          | Sauget et al., 2013   |                            |
|            | 6X3V             | GABA-A                      | Etomidate                 | $\beta 2+\alpha 1-$                    |                          | Kim et al., 2020      |                            |
|            | 6X3T             | GABA-A                      | Propofol                  |                                        |                          |                       |                            |
|            | 6X3W             | GABA-A                      | Phenobarbital             |                                        |                          |                       |                            |
|            | 6X3X             | GABA-A                      | Diazepam                  | $\beta 2+\alpha 1-, \gamma 2+\beta 2-$ |                          |                       |                            |
| 5VDH *     | alpha-3 Glycine  | Avermectin                  | $\alpha 3+\alpha 3-$      | Huang et al., 2017                     |                          |                       |                            |
| L          | 6D6T, 6D6U *     | GABA-A                      | Cholesterol               | $\beta 2+\alpha 1-$                    | -                        | Zhu et al., 2018      |                            |
| L          | 6D6T *           | GABA-A                      | Cholesterol               | $\alpha 1-$                            | -                        | Zhu et al., 2018      |                            |
| L          | 6D6T             | GABA-A                      | Cholesterol               | $\alpha 1+\beta 2-$                    | -                        | Zhu et al., 2018      |                            |
|            | 5OSA *           | GLIC-GABAAR alpha-1 chimera | Cholesterol Hemisuccinate | $\alpha 1+\alpha 1-$                   | -                        | Laverly et al., 2017  |                            |

|    |                              |                               |                           |                             |                      |                                         |
|----|------------------------------|-------------------------------|---------------------------|-----------------------------|----------------------|-----------------------------------------|
| L  | 6D6T, 6D6U *                 | GABA-A                        | Cholesterol               | $\beta 2+\alpha 1-$         | Site 7               | Zhu et al., 2018                        |
| L  | 6D6T *                       | GABA-A                        | Cholesterol               | $\alpha 1-$                 |                      | Zhu et al., 2018                        |
| L  | 6D6T                         | GABA-A                        | Cholesterol               | $\alpha 1+\beta 2-$         |                      | Zhu et al., 2018                        |
|    | 5OSA *                       | GLIC-GABAAR alpha-1 chimera   | Cholesterol Hemisuccinate | $\alpha 1+\alpha 1-$        |                      | Laverty et al., 2017                    |
| 8  | 6HUG, 6HUJ, 6X40 *           | GABA-A                        | Picrotoxin                | $\alpha \beta \alpha \beta$ | -                    | Masiulis et al., 2019, Kim et al., 2020 |
|    | 5MUO *                       | GLIC                          | Propofol                  |                             | -                    | Sauget et al., 2018                     |
| L  | 6D6T, 6D6U *                 | GABA-A                        | Cholesterol *             | $\beta 2+$                  | Site 10              | Zhu et al., 2018                        |
|    |                              |                               |                           | $\alpha 1+$                 |                      |                                         |
| 9  | 5OSC *                       | GLIC-GABAAR alpha-1 chimera   | Pregnenolone Sulfate *    | $\alpha 1+$                 |                      |                                         |
| L  | 3EAM *                       | GLIC                          | Lipid *                   |                             |                      | Bocquet et al., 2008                    |
| 10 | 6CDU *                       | chimeric human alpha-1 GABAA  | Alphaxalone *             | $\alpha 1+\alpha 1-$        | overlap with Site 9  | Chen et al., 2018                       |
|    | 5O8F *                       | chimeric beta-3 alpha-5 GABAA | Pregnenolone *            | $\alpha 5\beta 3$           |                      | Miller et al., 2017                     |
|    | 5OSB *                       | GLIC-GABAAR alpha-1 chimera   | THDOC *                   | $\alpha 1+\alpha 1-$        |                      | Laverty et al., 2017                    |
| L  | 6D6T *                       | GABA-A                        | Cholesterol *             | $\beta 2-$                  | Site 10              | Zhu et al., 2018                        |
| L  | 6D6T, 6D6U *                 | GABA-A                        | Cholesterol *             | $\alpha 1+\gamma 2-$        | -                    | Zhu et al., 2018                        |
| L  | 6I53 *                       | GABA-A                        | PIP2 *                    | $\alpha 1+$                 | overlap with site 10 | Laverty et al., 2019                    |
|    | 6HUO, 6HUK, 6HUJ, 6HUG, 6HUP |                               |                           |                             |                      | Masiulis et al., 2019                   |
| 11 | 4TWD, 4TWF                   | ELIC                          | memantine, bromomemantine |                             | -                    | Ukens et al., 2014                      |

**Supplementary Table S1: Overview of binding sites of GABA<sub>A</sub> receptors, including homologous proteins as displayed in Figure 2.** Binding sites were compared to Puthenkalam et al. and assigned to the new binding site nomenclature (Bocquet *et al.*, 2009; Nury *et al.*, 2011; Pan *et al.*, 2012; Zimmermann *et al.*, 2012; Sauguet *et al.*, 2013; Spurny *et al.*, 2013; Miller *et al.*, 2014; Ulens *et al.*, 2014; Spurny *et al.*, 2015; Nys *et al.*, 2016; Huang *et al.*, 2017; Laverty *et al.*, 2017; Miller *et al.*, 2017; Chen *et al.*, 2018; Fourati *et al.*, 2018; Liu *et al.*, 2018; Phulera *et al.*, 2018; Zhu *et al.*, 2018; Hénault *et al.*, 2019; Masiulis *et al.*, 2019; Kim *et al.*, 2020; Uchański *et al.*, 2021; Kasaragod *et al.*, 2022; Sente *et al.*, 2022; Zhu *et al.*, 2022). Numbers correspond to Figure 2, “L” stands for “lipid or cholesterol derived ligand”.

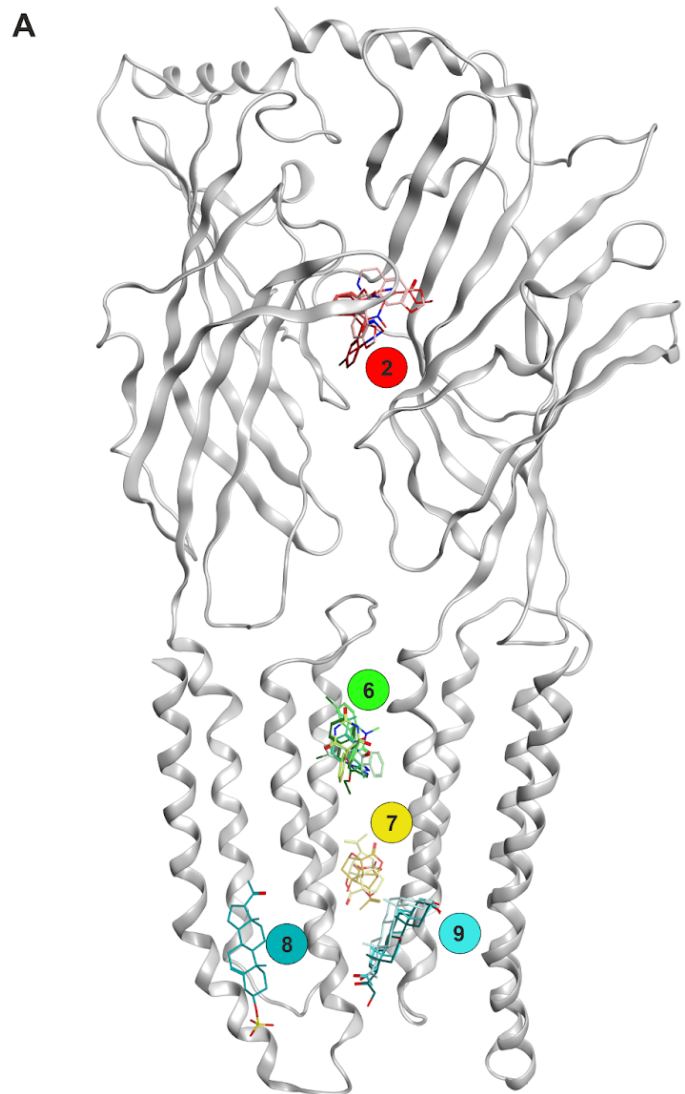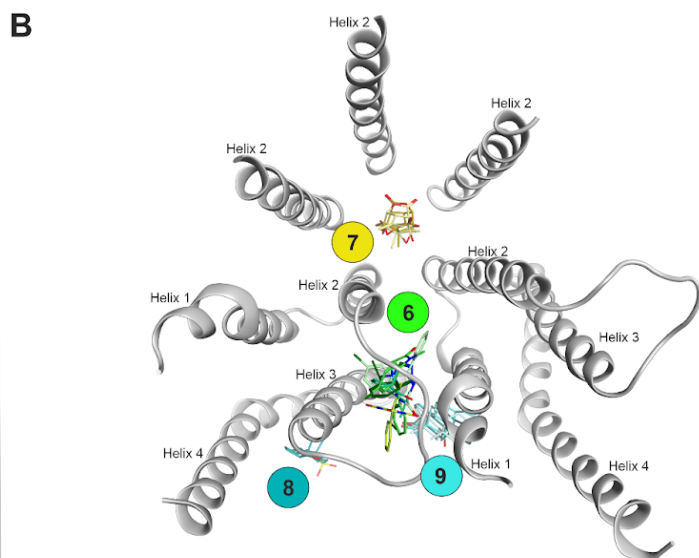

**C**

|          | Ligand                                                                                             |
|----------|----------------------------------------------------------------------------------------------------|
| <b>2</b> | GABA, Diazepam, Alprazolam, Flumazenil, Bicuculline methochloride, histamine, $\alpha$ -Cobratoxin |
| <b>6</b> | Diazepam, Propofol, Etomidate, Phenobarbital                                                       |
| <b>7</b> | Picrotoxin                                                                                         |
| <b>8</b> | Pregnenolone Sulfate, PIP2, lipid                                                                  |
| <b>9</b> | Alphaxalone, Pregnenolone, THDOC                                                                   |

**Supplementary Figure S1: Binding sites found in GABA<sub>A</sub> receptor atomic resolution structures.** (a) Side view and (b) top view of a superposition of the PDB files shown in (c). The ligands are represented in stick representation (GABA in red, diazepam in red for the ECD binding site (2), bicuculline methochloride in pink, flumazenil in red, diazepam in the TMD binding site (6) in light green, etomidate in green, phenobarbital in yellow-green, propofol in dark green, picrotoxin in yellow, alphaxalone in light cyan, THDOC in cyan, pregnanolone in dark cyan, pregnanolone sulfate in cyan). Binding sites are coloured and numbered according to their localization in the protein. Sites 2,6 and 9 are interface-located, whereas sites 8-9 are intrasubunit-located. Site 7 is located within the channel pore. (c) Table detailing all binding sites and their respective ligands. The corresponding binding site identification numbers reported in Puthenkalam *et. al.* are also depicted (Puthenkalam *et al.*, 2016).

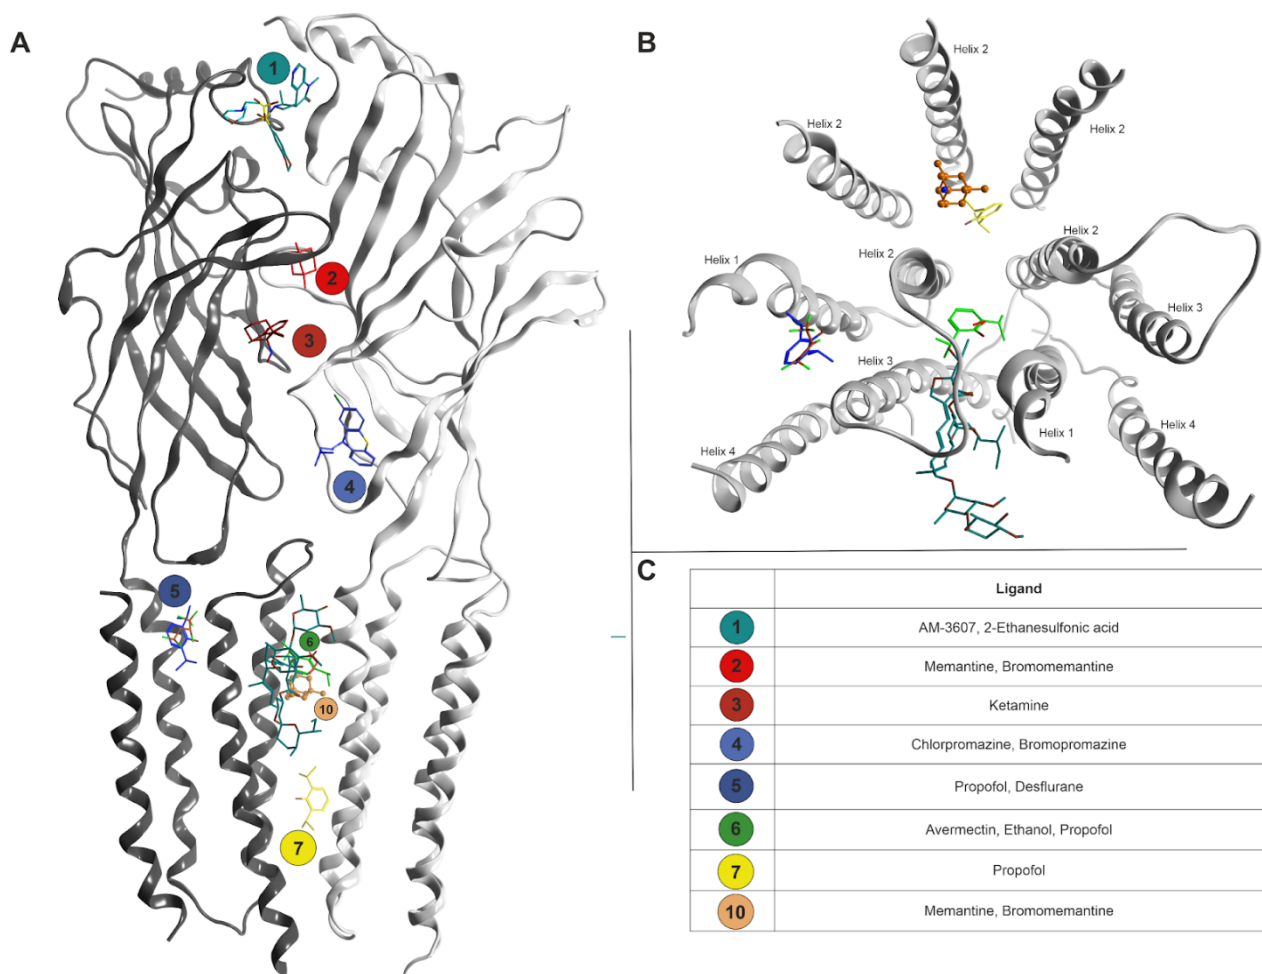

**Supplementary Figure S2. Binding sites found in homologous GABA<sub>A</sub> receptor atomic resolution structures.** (a) Side view and (b) top view of a superposition of the protein data bank identities (PDB IDs) shown in (c). Two subunits of 6HUP are shown in grey ribbon representation. The ligands are represented in stick representation (AM-3607 in cyan, memantine in the ECD site (2) in red, ketamine in dark red, chlorpromazine in blue, propofol in dark blue, avermectin in green, propofol in the channel blocker site (7), memantine in the channel blocker site (10) in orange). Binding sites are coloured and numbered according to their localization in the protein. Sites 1-3 and 6 are interface-located, whereas sites 4, 5 are intrasubunit-located. Site 7 and 10 is located within the channel pore. (c) Table detailing all binding sites and their respective ligands and PDB IDs. The corresponding binding site identification numbers reported in Puthenkalam *et al.* are also depicted (Puthenkalam *et al.*, 2016). ECD: extracellular domain, TMD: transmembrane domain.

**A**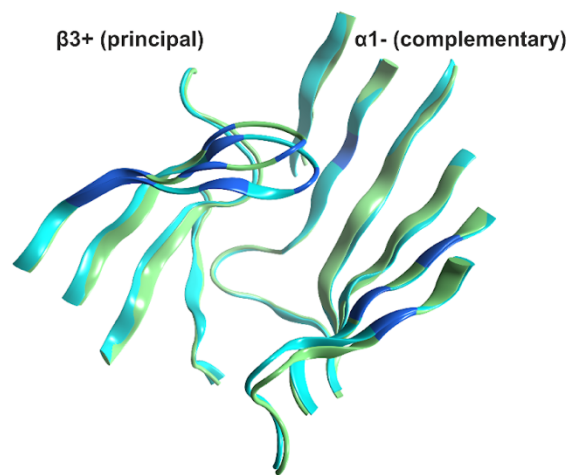**B**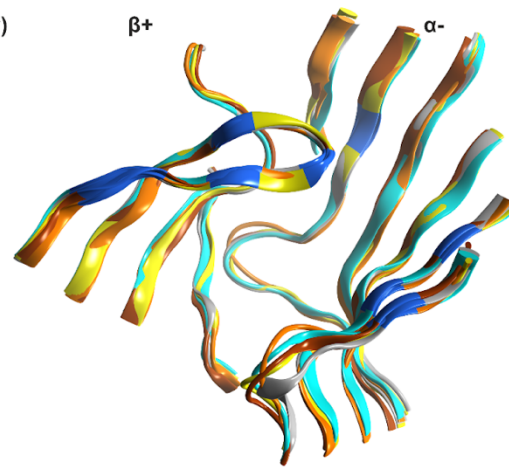

**Supplementary Figure S3:** GABA binding site (A) Comparison of the bicuculline bound state (6HUK in green) and GABA/picrotoxin bound state (6HUJ in cyan). Highlighted blue residues are showing the different residues in the b1, b2 and b3 subunits as in Figure 3A and 3D. (B) Superposition of b1 (6DW0 in orange), b2 (6D6T in yellow) and b3 (6HUJ in cyan, 7QNA in grey, 6A96 in brown) principal site and a1 (6HUJ, 6DW0, 6D6T), a4 (7QNA) and a5 (6A96) complementary site.

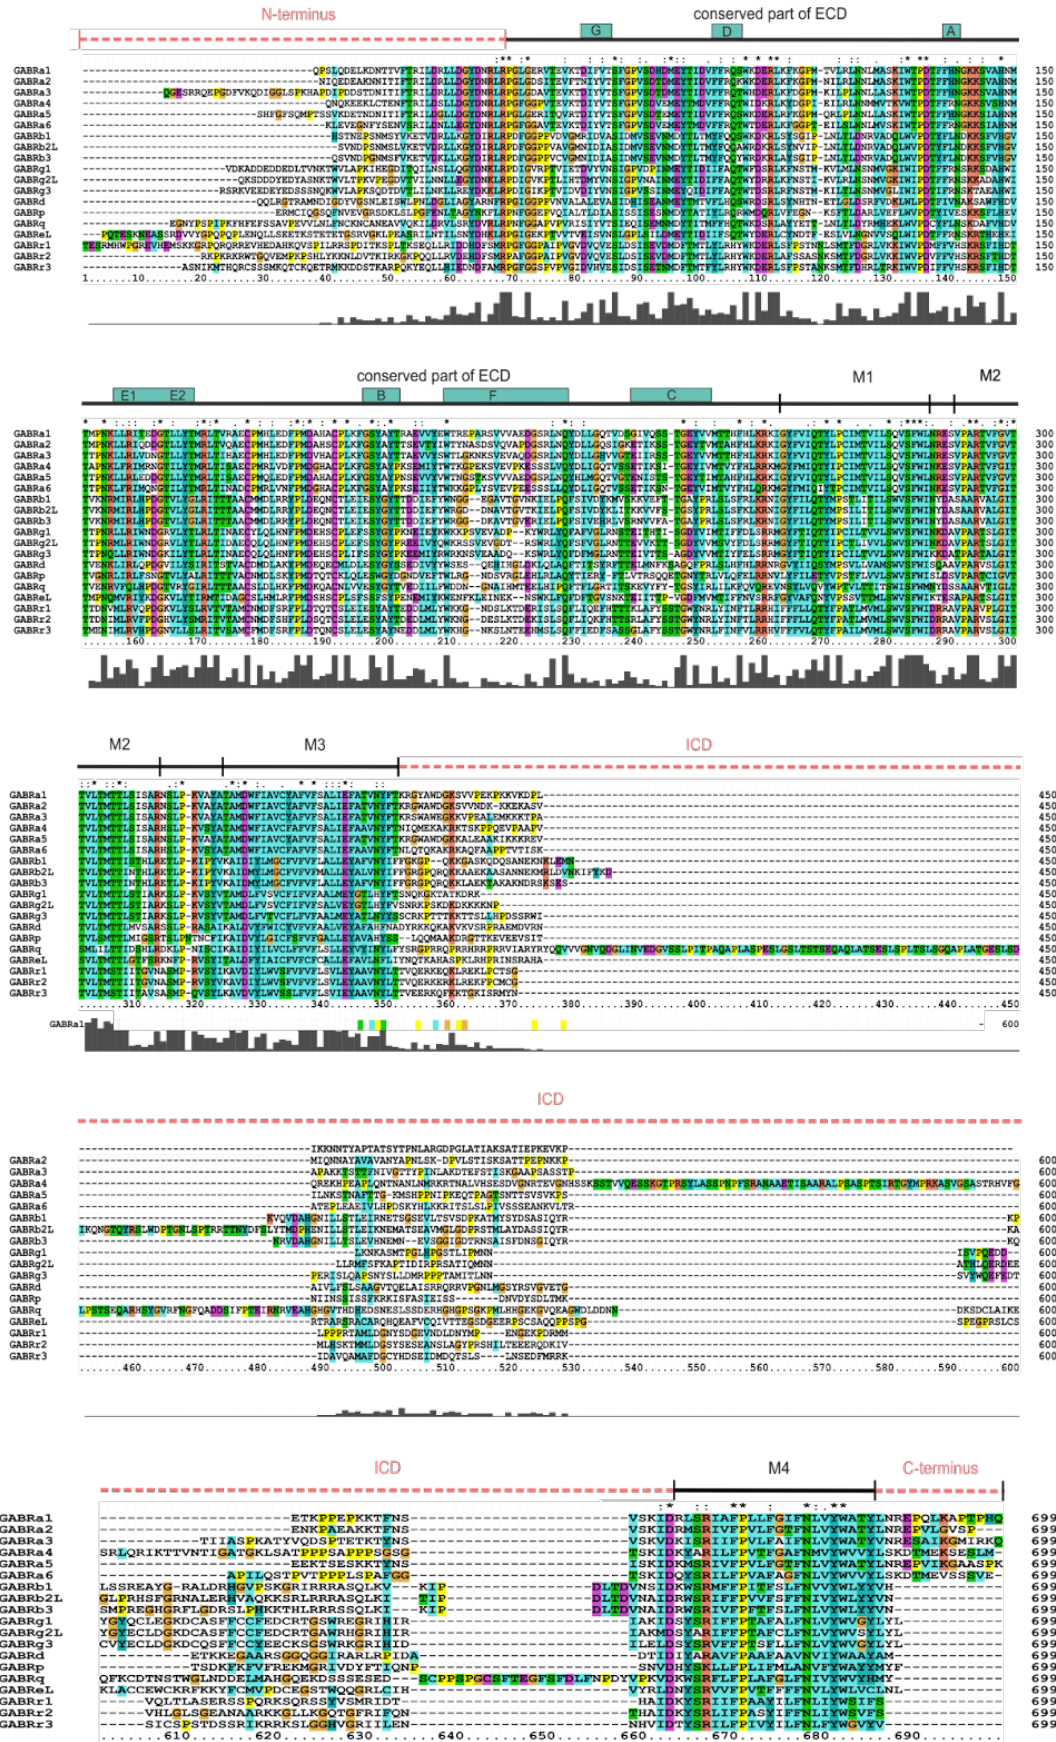

Supplementary Figure S4: Sequence alignment of the 19 human subunits with annotated segments A-G, M1-M4.

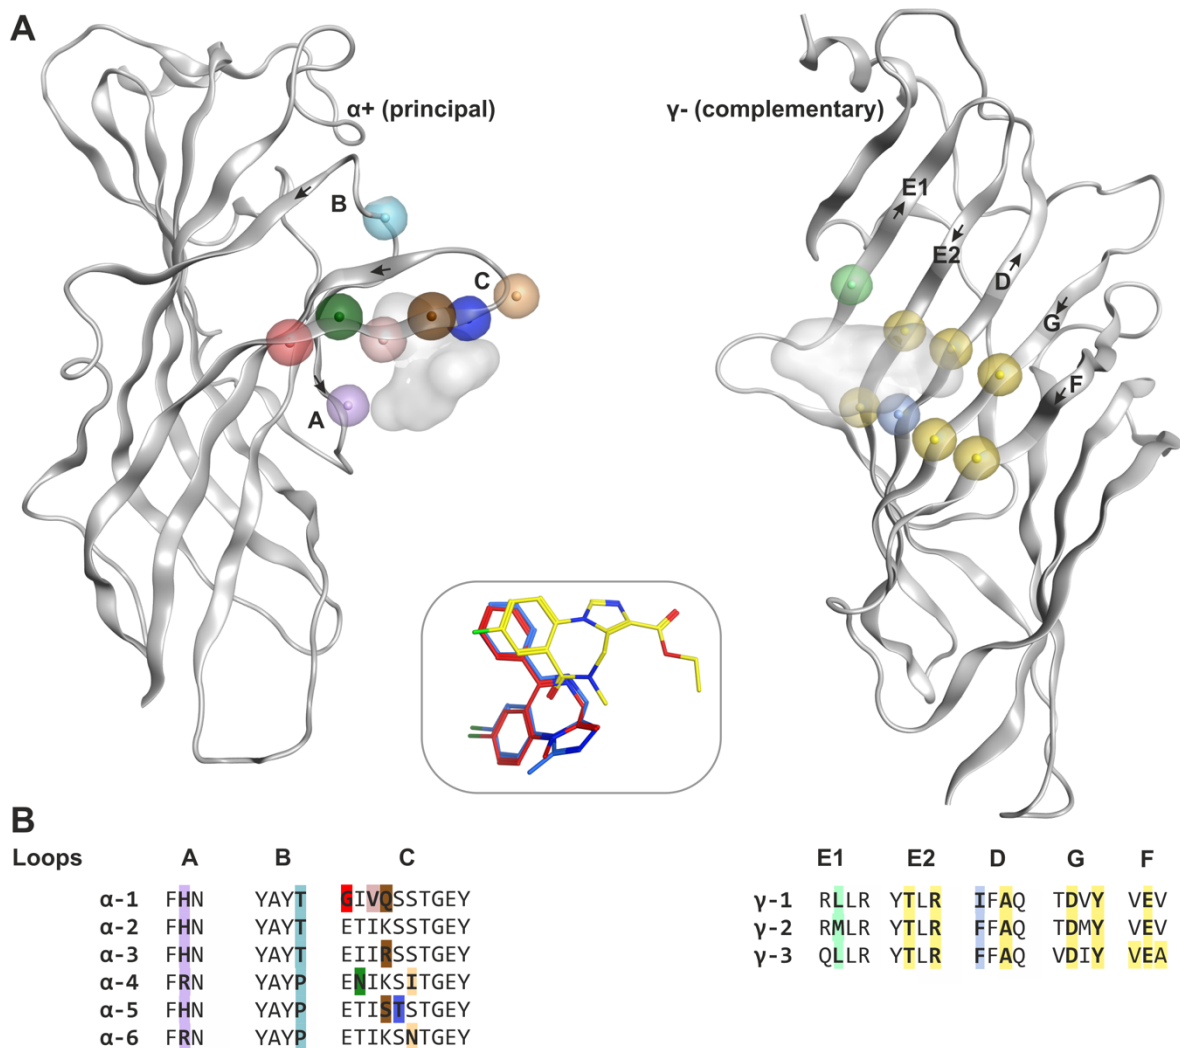

**Supplementary Figure S5:** ECD interface high affinity binding site for benzodiazepines: (A) Side view of the benzodiazepine binding site ( $\alpha$ +/ $\gamma$ - interface) from a PDBeFold superposition of selected atomic resolution structures (PDB IDs: 6HUP – diazepam, 6HUO – alprazolam, 6D6T/ 6D6U – flumazenil). The subunits are displayed individually to view also the deeper parts of the pocket. The direction of the beta strands is indicated by arrows on the ribbon. Ligands are displayed as shadows on the protein, for visualization purposes diazepam and alprazolam on the principal (+) side and flumazenil on the complementary (-) side. The insert box in the middle depicts the binding modes of diazepam (red), alprazolam (blue) and flumazenil (yellow). The coloured spheres on the ribbon rendering identify the variable positions, color matched with panel (B), on the so-called “loops” (segments) A-G. In loop A, highlighted in purple, are the amino acid differences between  $\alpha$ 4,6 and  $\alpha$ 1,2,3,5 subunits that render the former diazepam-insensitive (DI) and the latter diazepam-sensitive (DS). In loop B, highlighted in light blue, is the amino acid difference between  $\alpha$ 4,5,6 and  $\alpha$ 1,2,3 subunits that render the former zolpidem-insensitive (ZI) and the latter zolpidem-sensitive (ZS). Several differences are observed in loop C: Amino acid positions which are unique for any isoform are highlighted in different colors: in red and pink the unique amino acids of the  $\alpha$ 1 subunit; in brown the amino acids which are unique for the  $\alpha$ 1,  $\alpha$ 3 and  $\alpha$ 5 subunits, respectively; in dark blue the unique amino acid of the  $\alpha$ 5 subunit and in light orange the amino acids unique to  $\alpha$ 4 and  $\alpha$ 6 subunits, respectively. On the complementary side of the pocket ( $\gamma$ -) the binding site contributing amino acids are highlighted: in yellow all the positions that are conserved in all three  $\gamma$  isoforms; in cyan the unique amino acid in the  $\gamma$ 1 subunit and in light green the unique amino acid in the  $\gamma$ 2 subunit. More variable positions are found on segment F (Supplementary Figure S4). (B) provides the partial alignment for the binding site forming segments, more loop F information is in S4.



| Scientific name of species | Species                                        |
|----------------------------|------------------------------------------------|
| Homo sapiens               | Human                                          |
| Rattus norvegicus          | Rat                                            |
| Mus musculus               | Mouse                                          |
| Pan paniscus               | Bonobo, historically called : pygmy chimpanzee |
| Pan troglodytes            | Common chimpanzee                              |
| Mustela putorius furo      | Ferret                                         |
| Macaca mulatta             | Rhesus macaque                                 |
| Canis lupus familiaris     | Domestic dog                                   |
| Danio rerio                | Zebrafish                                      |
| Bos taurus                 | Cattle                                         |

**Supplementary Table S2:** Names of species that were used in this study for protein sequence comparisons.

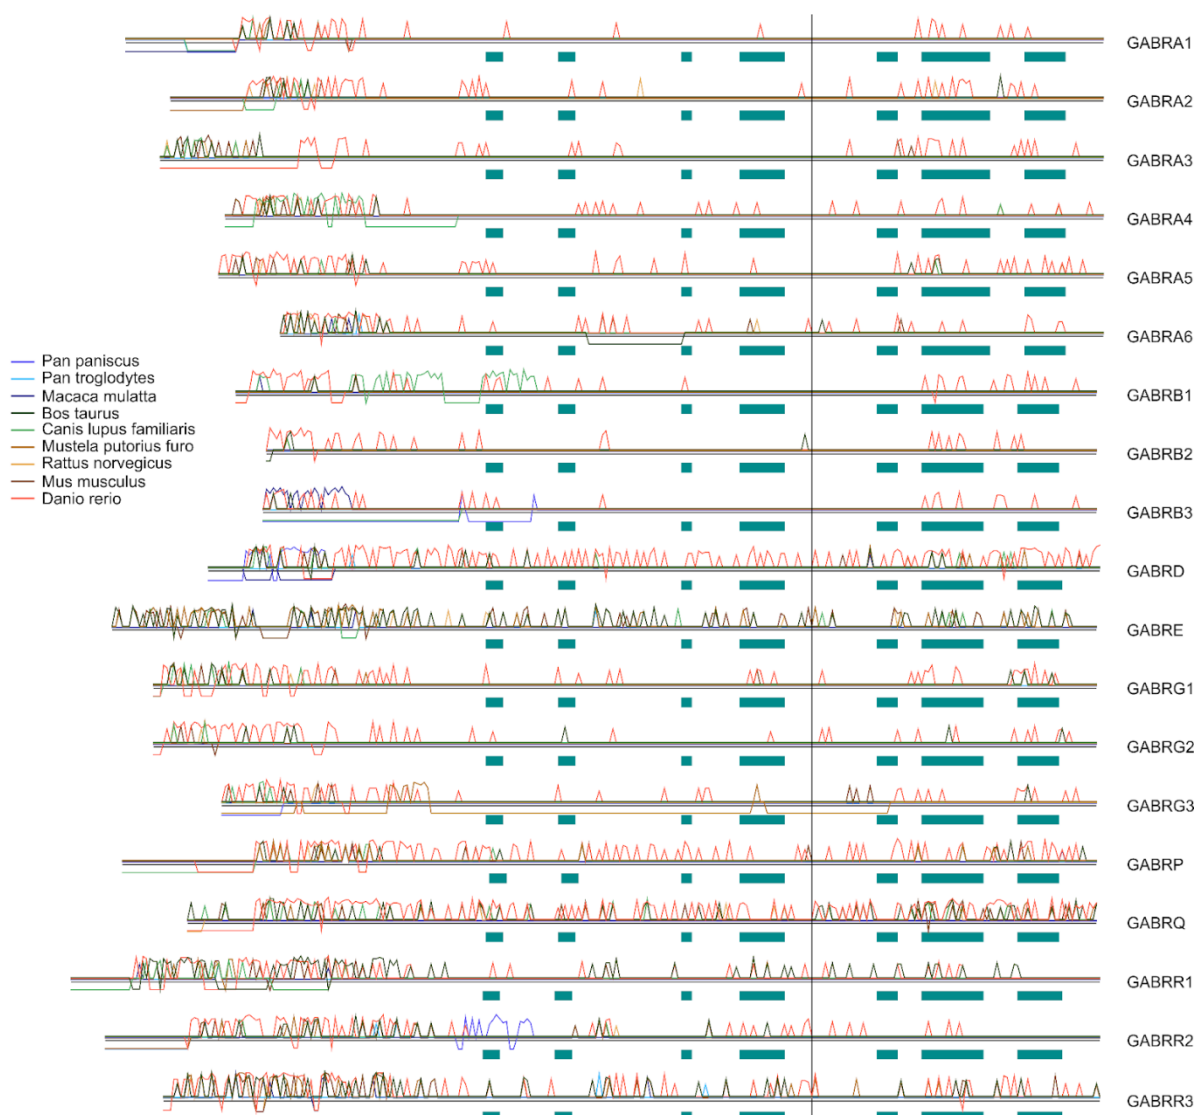

**Supplementary Figure S6: Overview of pairwise differences between the human subunits and nine orthologs in the ECD.** Substitution scores are plotted for pairwise alignments between human sequences and their orthologs as described in the methods. The colors reflect the different species as indicated in the legend. Full alignments and the correspondences for Danio rerio (which lacks an epsilon subunit) are in Supplementary Figure S8. The upwards spikes correlate with the (normalized) substitution score for amino acid exchanges from the blosum90 matrix, and downwards deflections indicate insertions/deletions (INDELs). The score graphs are aligned along the cys-loop, the second cysteine is represented by the vertical bar. The binding site forming segments G, D, A, E, B, F and C (from N- to C-terminal) are indicated by cyan bars below the graph for each subunit.

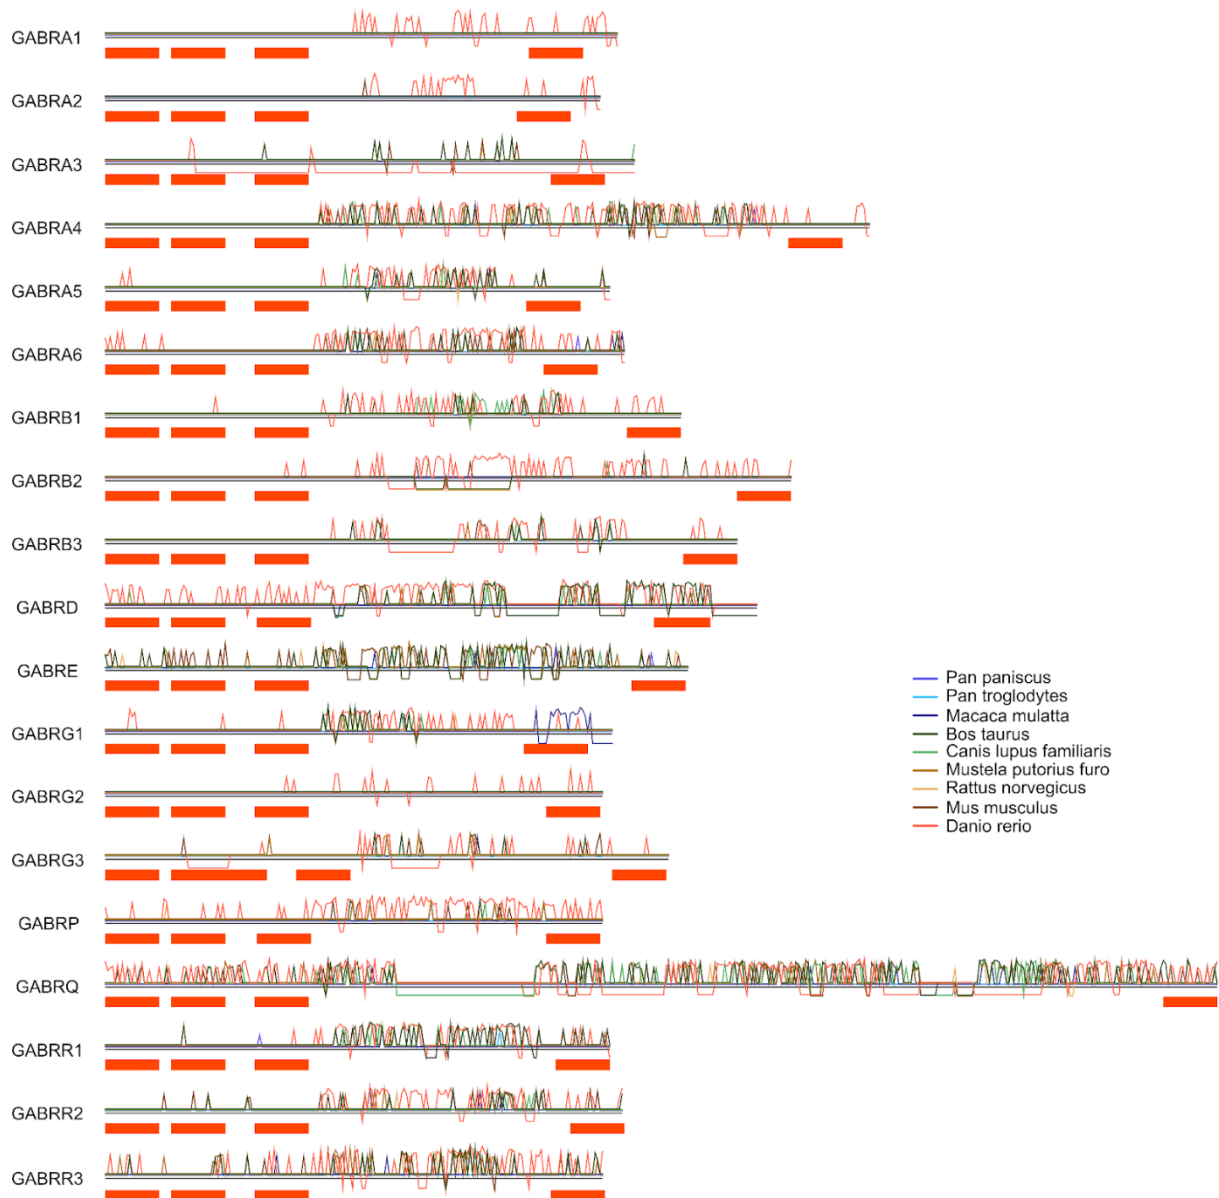

**Supplementary Figure S7: Overview of pairwise differences between the human subunits and nine orthologs in the TMD and ICD.** Substitution scores are plotted for pairwise alignments between human sequences and their orthologs as described in the methods. The colors reflect the different species as indicated in the legend. Full alignments and the correspondences for *Danio rerio* (which lacks an epsilon subunit) are in Supplementary Figure S8. The upwards spikes correlate with the (normalized) substitution score for amino acid exchanges from the blosum90 matrix, and downwards deflections indicate INDELs. The score graphs are aligned at the beginning of TM1, the four TM segments are indicated by red bars below each score graph.

The next pages provide per subunit alignments from up to 10 species as Supplementary Figure S8

P14867|GABRA1\_Homo\_sapiens -----MRKSPGLSDCLWAWILLLST--LTGRSYGQPSLODELKDNTVVFTRILDRLLDGYDNRLRPGLGERV 65  
A0A2R9AU65|GABRA1\_Pan\_paniscus -----MVQVSIASNELLOPAMRKSPGLSDCLWAWILLLST--LTGRSYGQPSLODELKDNTVVFTRILDRLLDGYDNRLRPGLGERV 80  
A0A2I3SDV7|GABRA1\_Pan\_troglodytes -----MVQVSIASNELLOPAMRKSPGLSDCLWAWILLLST--LTGRSYGQPSLODELKDNTVVFTRILDRLLDGYDNRLRPGLGERV 80  
A0A1D5Q406|GABRA1\_Macaca\_mulatta MFLNGEMEGKVENGWSRFPPLLPMRCHIPLLOPAMRKSPGLSDYLWAWILLLST--LTGRSYGQPSLODELKDNTVVFTRILDRLLDGYDNRLRPGLGERV 98  
M3YP62|GABRA1\_Mustela\_putorius\_furo -----MKKSPGFSEYLAWAWILLLST--LTGRSYGQPSLODELKDNTVVFTRILDRLLDGYDNRLRPGLGERV 65  
P62813|GABRA1\_Rattus\_norvegicus -----MKKSRGLSDYLWAWILLLST--LSGRSYGQPSLODELKDNTVVFTRILDRLLDGYDNRLRPGLGERV 64  
P62812|GABRA1\_Mus\_musculus -----MKKSRGLSDYLWAWILLLST--LSGRSYGQPSLODELKDNTVVFTRILDRLLDGYDNRLRPGLGERV 64  
E2RSP8|GABRA1\_Canis\_lupus\_familiaris -----MVQVSIASNELHKPAMKSLGLSDYLWAWILLLST--LTGRSYGQPSLODELKDNTVVFTRILDRLLDGYDNRLRPGLGERV 80  
Q08BJ3|GABRA1\_Danio\_rerio -----MMWGGRG-AAWLWIWACLVTNALAGKSSNA--DEQKDNNTVVFTRILDRLLDGYDNRLRPGLGERV 65  
P08219|GABRA1\_Bos\_taurus -----MKKSPGLSDYLWAWILLLST--LTGRSYGQPSLODELKDNTVVFTRILDRLLDGYDNRLRPGLGERV 65  
1.....10.....20.....30.....40.....50.....60.....70.....80.....90.....100

\*\*\*\*\*:\*\*\*\*\*:\*\*\*\*\*:\*\*\*\*\*:\*\*\*\*\*:\*\*\*\*\*:\*\*\*\*\*:\*\*\*\*\*:\*\*\*\*\*:\*\*\*\*\*:\*\*\*\*\*:\*\*\*\*\*:\*\*\*\*\*:\*\*\*\*\*:\*\*\*\*\*:\*\*\*\*\*  
P14867|GABRA1\_Homo\_sapiens TEVKTDIFVTSFGPVSDDHMEYTDIDVFFRQSWKDERLKFKGPMTVLRLNNLMASKIWTPTDFFHNKKSVAHNMTMPNKLRLITEDGTLTYMRLTVRAE 165  
A0A2R9AU65|GABRA1\_Pan\_paniscus TEVKTDIFVTSFGPVSDDHMEYTDIDVFFRQSWKDERLKFKGPMTVLRLNNLMASKIWTPTDFFHNKKSVAHNMTMPNKLRLITEDGTLTYMRLTVRAE 180  
A0A2I3SDV7|GABRA1\_Pan\_troglodytes TEVKTDIFVTSFGPVSDDHMEYTDIDVFFRQSWKDERLKFKGPMTVLRLNNLMASKIWTPTDFFHNKKSVAHNMTMPNKLRLITEDGTLTYMRLTVRAE 180  
A0A1D5Q406|GABRA1\_Macaca\_mulatta TEVKTDIFVTSFGPVSDDHMEYTDIDVFFRQSWKDERLKFKGPMTVLRLNNLMASKIWTPTDFFHNKKSVAHNMTMPNKLRLITEDGTLTYMRLTVRAE 198  
M3YP62|GABRA1\_Mustela\_putorius\_furo TEVKTDIFVTSFGPVSDDHMEYTDIDVFFRQSWKDERLKFKGPMTVLRLNNLMASKIWTPTDFFHNKKSVAHNMTMPNKLRLITEDGTLTYMRLTVRAE 165  
P62813|GABRA1\_Rattus\_norvegicus TEVKTDIFVTSFGPVSDDHMEYTDIDVFFRQSWKDERLKFKGPMTVLRLNNLMASKIWTPTDFFHNKKSVAHNMTMPNKLRLITEDGTLTYMRLTVRAE 164  
P62812|GABRA1\_Mus\_musculus TEVKTDIFVTSFGPVSDDHMEYTDIDVFFRQSWKDERLKFKGPMTVLRLNNLMASKIWTPTDFFHNKKSVAHNMTMPNKLRLITEDGTLTYMRLTVRAE 164  
E2RSP8|GABRA1\_Canis\_lupus\_familiaris TEVKTDIFVTSFGPVSDDHMEYTDIDVFFRQSWKDERLKFKGPMTVLRLNNLMASKIWTPTDFFHNKKSVAHNMTMPNKLRLITEDGTLTYMRLTVRAE 180  
Q08BJ3|GABRA1\_Danio\_rerio TEVKTDIFVTSFGPVSDDHMEYTDIDVFFRQSWKDERLKFKGPMTVLRLNNLMASKIWTPTDFFHNKKSVAHNMTMPNKLRLITEDGTLTYMRLTVRAE 165  
P08219|GABRA1\_Bos\_taurus TEVKTDIFVTSFGPVSDDHMEYTDIDVFFRQSWKDERLKFKGPMTVLRLNNLMASKIWTPTDFFHNKKSVAHNMTMPNKLRLITEDGTLTYMRLTVRAE 165  
.....110.....120.....130.....140.....150.....160.....170.....180.....190.....200

\*\*\*\*\*:\*\*\*\*\*:\*\*\*\*\*:\*\*\*\*\*:\*\*\*\*\*:\*\*\*\*\*:\*\*\*\*\*:\*\*\*\*\*:\*\*\*\*\*:\*\*\*\*\*:\*\*\*\*\*:\*\*\*\*\*:\*\*\*\*\*:\*\*\*\*\*:\*\*\*\*\*:\*\*\*\*\*  
P14867|GABRA1\_Homo\_sapiens CPMHLEDFPMDAHACPLKFGSYAYTRADEVVYEWTRPARSVVVAEDGSRLNQYDLLGQTVDSGIVOSSTGEYVVMTHFHLKRRKIGYFVIQTYLPCIMTV 265  
A0A2R9AU65|GABRA1\_Pan\_paniscus CPMHLEDFPMDAHACPLKFGSYAYTRADEVVYEWTRPARSVVVAEDGSRLNQYDLLGQTVDSGIVOSSTGEYVVMTHFHLKRRKIGYFVIQTYLPCIMTV 280  
A0A2I3SDV7|GABRA1\_Pan\_troglodytes CPMHLEDFPMDAHACPLKFGSYAYTRADEVVYEWTRPARSVVVAEDGSRLNQYDLLGQTVDSGIVOSSTGEYVVMTHFHLKRRKIGYFVIQTYLPCIMTV 280  
A0A1D5Q406|GABRA1\_Macaca\_mulatta CPMHLEDFPMDAHACPLKFGSYAYTRADEVVYEWTRPARSVVVAEDGSRLNQYDLLGQTVDSGIVOSSTGEYVVMTHFHLKRRKIGYFVIQTYLPCIMTV 298  
M3YP62|GABRA1\_Mustela\_putorius\_furo CPMHLEDFPMDAHACPLKFGSYAYTRADEVVYEWTRPARSVVVAEDGSRLNQYDLLGQTVDSGIVOSSTGEYVVMTHFHLKRRKIGYFVIQTYLPCIMTV 265  
P62813|GABRA1\_Rattus\_norvegicus CPMHLEDFPMDAHACPLKFGSYAYTRADEVVYEWTRPARSVVVAEDGSRLNQYDLLGQTVDSGIVOSSTGEYVVMTHFHLKRRKIGYFVIQTYLPCIMTV 264  
P62812|GABRA1\_Mus\_musculus CPMHLEDFPMDAHACPLKFGSYAYTRADEVVYEWTRPARSVVVAEDGSRLNQYDLLGQTVDSGIVOSSTGEYVVMTHFHLKRRKIGYFVIQTYLPCIMTV 264  
E2RSP8|GABRA1\_Canis\_lupus\_familiaris CPMHLEDFPMDAHACPLKFGSYAYTRADEVVYEWTRPARSVVVAEDGSRLNQYDLLGQTVDSGIVOSSTGEYVVMTHFHLKRRKIGYFVIQTYLPCIMTV 280  
Q08BJ3|GABRA1\_Danio\_rerio CPMHLEDFPMDAHACPLKFGSYAYTRADEVVYVWTRGAAQSVVVADDSRLNQYDLMOQSVDSGIVOSSTGEYVVMTHFHLKRRKIGYFVIQTYLPCIMTV 265  
P08219|GABRA1\_Bos\_taurus CPMHLEDFPMDAHACPLKFGSYAYTRADEVVYEWTRPARSVVVAEDGSRLNQYDLLGQTVDSGIVOSSTGEYVVMTHFHLKRRKIGYFVIQTYLPCIMTV 265  
.....210.....220.....230.....240.....250.....260.....270.....280.....290.....300

\*\*\*\*\*:\*\*\*\*\*:\*\*\*\*\*:\*\*\*\*\*:\*\*\*\*\*:\*\*\*\*\*:\*\*\*\*\*:\*\*\*\*\*:\*\*\*\*\*:\*\*\*\*\*:\*\*\*\*\*:\*\*\*\*\*:\*\*\*\*\*:\*\*\*\*\*:\*\*\*\*\*:\*\*\*\*\*  
P14867|GABRA1\_Homo\_sapiens ILSQVSFWLNRESVSPARTVFGVTVLTMTLTSLISARNSLPKVAYATAMDWFIACVAFVFSALIEFATVNYFTKRGYAWDGKSVVPEKPKVKDPLIKKN 365  
A0A2R9AU65|GABRA1\_Pan\_paniscus ILSQVSFWLNRESVSPARTVFGVTVLTMTLTSLISARNSLPKVAYATAMDWFIACVAFVFSALIEFATVNYFTKRGYAWDGKSVVPEKPKVKDPLIKKN 380  
A0A2I3SDV7|GABRA1\_Pan\_troglodytes ILSQVSFWLNRESVSPARTVFGVTVLTMTLTSLISARNSLPKVAYATAMDWFIACVAFVFSALIEFATVNYFTKRGYAWDGKSVVPEKPKVKDPLIKKN 380  
A0A1D5Q406|GABRA1\_Macaca\_mulatta ILSQVSFWLNRESVSPARTVFGVTVLTMTLTSLISARNSLPKVAYATAMDWFIACVAFVFSALIEFATVNYFTKRGYAWDGKSVVPEKPKVKDPLIKKN 398  
M3YP62|GABRA1\_Mustela\_putorius\_furo ILSQVSFWLNRESVSPARTVFGVTVLTMTLTSLISARNSLPKVAYATAMDWFIACVAFVFSALIEFATVNYFTKRGYAWDGKSVVPEKPKVKDPLIKKN 365  
P62813|GABRA1\_Rattus\_norvegicus ILSQVSFWLNRESVSPARTVFGVTVLTMTLTSLISARNSLPKVAYATAMDWFIACVAFVFSALIEFATVNYFTKRGYAWDGKSVVPEKPKVKDPLIKKN 364  
P62812|GABRA1\_Mus\_musculus ILSQVSFWLNRESVSPARTVFGVTVLTMTLTSLISARNSLPKVAYATAMDWFIACVAFVFSALIEFATVNYFTKRGYAWDGKSVVPEKPKVKDPLIKKN 364  
E2RSP8|GABRA1\_Canis\_lupus\_familiaris ILSQVSFWLNRESVSPARTVFGVTVLTMTLTSLISARNSLPKVAYATAMDWFIACVAFVFSALIEFATVNYFTKRGYAWDGKSVVPEKPKVKDPLIKKN 380  
Q08BJ3|GABRA1\_Danio\_rerio ILSQVSFWLNRESVSPARTVFGVTVLTMTLTSLISARNSLPKVAYATAMDWFIACVAFVFSALIEFATVNYFTKRGYAWDGKSVVPEKPKVKKESLKKN 365  
P08219|GABRA1\_Bos\_taurus ILSQVSFWLNRESVSPARTVFGVTVLTMTLTSLISARNSLPKVAYATAMDWFIACVAFVFSALIEFATVNYFTKRGYAWDGKSVVPEKPKVKDPLIKKN 365  
.....310.....320.....330.....340.....350.....360.....370.....380.....390.....400

\*\*\*:\*\*\*:\*\*\*:\*\*\*:\*\*\*:\*\*\*:\*\*\*:\*\*\*:\*\*\*:\*\*\*:\*\*\*:\*\*\*:\*\*\*:\*\*\*:\*\*\*:\*\*\*  
P14867|GABRA1\_Homo\_sapiens NTY-APTATSYTPNLARGDPGLATIAKSATIEPKEVK--PETKPEPKKTFNSVSKIDRLSRIAPLLFGIFNLVYWATYLNREPOLKAPT--PHQ 456  
A0A2R9AU65|GABRA1\_Pan\_paniscus NTY-APTATSYTPNLARGDPGLATIAKSATIEPKEVK--PETKPEPKKTFNSVSKIDRLSRIAPLLFGIFNLVYWATYLNREPOLKAPT--PHQ 471  
A0A2I3SDV7|GABRA1\_Pan\_troglodytes NTY-APTATSYTPNLARGDPGLATIAKSATIEPKEVK--PETKPEPKKTFNSVSKIDRLSRIAPLLFGIFNLVYWATYLNREPOLKAPT--PHQ 471  
A0A1D5Q406|GABRA1\_Macaca\_mulatta NTY-APTATSYTPNLARGDPGLATIAKSATIEPKEVK--PETKPEPKKTFNSVSKIDRLSRIAPLLFGIFNLVYWATYLNREPOLKAPT--PHQ 489  
M3YP62|GABRA1\_Mustela\_putorius\_furo NTY-APTATSYTPNLARGDPGLATIAKSATIEPKEVK--PETKPEPKKTFNSVSKIDRLSRIAPLLFGIFNLVYWATYLNREPOLKAPT--PHQ 456  
P62813|GABRA1\_Rattus\_norvegicus NTY-APTATSYTPNLARGDPGLATIAKSATIEPKEVK--PETKPEPKKTFNSVSKIDRLSRIAPLLFGIFNLVYWATYLNREPOLKAPT--PHQ 455  
P62812|GABRA1\_Mus\_musculus NTY-APTATSYTPNLARGDPGLATIAKSATIEPKEVK--PETKPEPKKTFNSVSKIDRLSRIAPLLFGIFNLVYWATYLNREPOLKAPT--PHQ 455  
E2RSP8|GABRA1\_Canis\_lupus\_familiaris NTY-APTATSYTPNLARGDPGLATIAKSATIEPKEVK--PETKPEPKKTFNSVSKIDRLSRIAPLLFGIFNLVYWATYLNREPOLKAPT--PHQ 471  
Q08BJ3|GABRA1\_Danio\_rerio NTYTAATATAFAPNIAI--DPGLATIAKSAPPPTEPKKPKPKPAKKTFFNSVSKIDRIARAFPLFGIFNLVYWATYLNKKPKLQGMNLQPH- 459  
P08219|GABRA1\_Bos\_taurus NTY-APTATSYTPNLARGDPGLATIAKSATIEPKEVK--PETKPEPKKTFNSVSKIDRLSRIAPLLFGIFNLVYWATYLNREPOLKAPT--PHQ 456  
.....410.....420.....430.....440.....450.....460.....470.....480.....490.....

\*:.\*.\*. : \* . \* \*\*\*\*\*:\*\*\*\*\*:\*\*\* \*:\*\*\*\*\*

P47869|GABRA2\_Homo sapiens -----MKTKLNINMQFLLFVFLVWDPARLVLANIQEDEAKNNITIFTRILDRLLDGYDNRLRPLGLGDSITEVFTNIYVTSFG 78  
XP\_003816076.1|GABRA2\_Pan\_paniscus -----MKTKLNINMQFLLFVFLVWDPARLVLANIQEDEAKNNITIFTRILDRLLDGYDNRLRPLGLGDSITEVFTNIYVTSFG 78  
M3Y0V9|GABRA2\_Mustela putorius furo MVQLNVILSVFYFSCMALQRAAMKTKLNTYNVQLLLLVFLVWDPARLVLANIQEDEAKNNITIFTRILDRLLDGYDNRLRPLGLGDSITEVFTNIYVTSFG 100  
P23576|GABRA2\_Rattus norvegicus -----MRTKLSTCNVWFLPLLVLLVWNPARLVLANIQEDEAKNNITIFTRILDRLLDGYDNRLRPLGLGDSITEVFTNIYVTSFG 78  
P26048|GABRA2\_Mus musculus -----MKTKLNINMQFLLFVFLVWDPARLVLANIQEDEAKNNITIFTRILDRLLDGYDNRLRPLGLGDSITEVFTNIYVTSFG 78  
AOA5F4CYJ7|GABRA2\_Canis lupus familiaris -----MRLLLLVFLVWDPARLVLANIQEDEAKNNITIFTRILDRLLDGYDNRLRPLGLGDSITEVFTNIYVTSFG 69  
H2QPE5|GABRA2\_Pan troglodytes -----MKTKLNINMQFLLFVFLVWDPARLVLANIQEDEAKNNITIFTRILDRLLDGYDNRLRPLGLGDSITEVFTNIYVTSFG 78  
E7F635|GABRA2a\_Danio rerio -----MILRRGHSHGFLIHLFLVLVW-RACEAEVSGSDFAKNNITLFTIRLDRLLDGYDNRLRPLGLGDRVTEVKTDIYVTSFG 78  
XP\_028703913.1|GABRA2\_Macaca mulatta -----MKTKLNINMQFLLFVFLVWDPARLVLANIQEDEAKNNITIFTRILDRLLDGYDNRLRPLGLGDSITEVFTNIYVTSFG 78  
P10063|GABRA2\_Bos taurus -----MKTKLNSNMQLLLFVFLVWDPARLVLANIQEDEAKNNITIFTRILDRLLDGYDNRLRPLGLGDSITEVFTNIYVTSFG 78  
1.....10.....20.....30.....40.....50.....60.....70.....80.....90.....100

\*\*\*\*\*:\*\*\*\*\*:\*\*\*\*\*:\*\*\*\*\* \*\*\*\*\*:\*\*\*\*\* \*\*\*\*\*:\*\*\*\*\* \*\*\*\*\*:\*\*\*\*\* \*\*\*\*\*:\*\*\*\*\* \*\*\*\*\*:\*\*\*\*\* \*\*\*\*\*:\*\*\*\*\* \*\*\*\*\*:\*\*\*\*\* \*\*\*\*\*:\*\*\*\*\*

P47869|GABRA2\_Homo sapiens PVSDTDMEYITDVFFRQKWKDERLKFQKPMNILRLNNLMASKIWPDPDTFFHNGKKSVAHNMTMPNKLRLRIQDDGTLTYMRLTVAQECPMHLEDFFPMDAH 178  
XP\_003816076.1|GABRA2\_Pan\_paniscus PVSDTDMEYITDVFFRQKWKDERLKFQKPMNILRLNNLMASKIWPDPDTFFHNGKKSVAHNMTMPNKLRLRIQDDGTLTYMRLTVAQECPMHLEDFFPMDAH 178  
M3Y0V9|GABRA2\_Mustela putorius furo PVSDTDMEYITDVFFRQKWKDERLKFQKPMNILRLNNLMASKIWPDPDTFFHNGKKSVAHNMTMPNKLRLRIQDDGTLTYMRLTVAQECPMHLEDFFPMDAH 200  
P23576|GABRA2\_Rattus norvegicus PVSDTDMEYITDVFFRQKWKDERLKFQKPMNILRLNNLMASKIWPDPDTFFHNGKKSVAHNMTMPNKLRLRIQDDGTLTYMRLTVAQECPMHLEDFFPMDAH 178  
P26048|GABRA2\_Mus musculus PVSDTDMEYITDVFFRQKWKDERLKFQKPMNILRLNNLMASKIWPDPDTFFHNGKKSVAHNMTMPNKLRLRIQDDGTLTYMRLTVAQECPMHLEDFFPMDAH 178  
AOA5F4CYJ7|GABRA2\_Canis lupus familiaris PVSDTDMEYITDVFFRQKWKDERLKFQKPMNILRLNNLMASKIWPDPDTFFHNGKKSVAHNMTMPNKLRLRIQDDGTLTYMRLTVAQECPMHLEDFFPMDAH 169  
H2QPE5|GABRA2\_Pan troglodytes PVSDTDMEYITDVFFRQKWKDERLKFQKPMNILRLNNLMASKIWPDPDTFFHNGKKSVAHNMTMPNKLRLRIQDDGTLTYMRLTVAQECPMHLEDFFPMDAH 178  
E7F635|GABRA2a\_Danio rerio PVSDTDMEYITDVFFRQKWKDERLKFQKPMNILRLNNLMASKIWPDPDTFFHNGKKSVAHNMTMPNKLRLRIMENGTLLTYMRLTVAQECPMHLEDFFPMDAH 178  
XP\_028703913.1|GABRA2\_Macaca mulatta PVSDTDMEYITDVFFRQKWKDERLKFQKPMNILRLNNLMASKIWPDPDTFFHNGKKSVAHNMTMPNKLRLRIQDDGTLTYMRLTVAQECPMHLEDFFPMDAH 178  
P10063|GABRA2\_Bos taurus PVSDTDMEYITDVFFRQKWKDERLKFQKPMNILRLNNLMASKIWPDPDTFFHNGKKSVAHNMTMPNKLRLRIQDDGTLTYMRLTVAQECPMHLEDFFPMDAH 178  
.....110.....120.....130.....140.....150.....160.....170.....180.....190.....200

\*\*\*\*\*:\*\*\*\*\*:\*\*\*\*\*:\*\*\*\*\* \*\*\*\*\*:\*\*\*\*\* \*\*\*\*\*:\*\*\*\*\* \*\*\*\*\*:\*\*\*\*\* \*\*\*\*\*:\*\*\*\*\* \*\*\*\*\*:\*\*\*\*\* \*\*\*\*\*:\*\*\*\*\* \*\*\*\*\*:\*\*\*\*\* \*\*\*\*\*:\*\*\*\*\*

P47869|GABRA2\_Homo sapiens SCPLKFGSYAYTTSEVYIWTYNASDSVQVAPDGSRLNQYDLLGQSIGKETIKSSTGEYTVMTAHFHLKRKIGYFVIQTYLPCIMTVILSQVSWFLNRES 278  
XP\_003816076.1|GABRA2\_Pan\_paniscus SCPLKFGSYAYTTSEVYIWTYNASDSVQVAPDGSRLNQYDLLGQSIGKETIKSSTGEYTVMTAHFHLKRKIGYFVIQTYLPCIMTVILSQVSWFLNRES 278  
M3Y0V9|GABRA2\_Mustela putorius furo SCPLKFGSYAYTTSEVYIWTYNASDSVQVAPDGSRLNQYDLLGQSIGKETIKSSTGEYTVMTAHFHLKRKIGYFVIQTYLPCIMTVILSQVSWFLNRES 300  
P23576|GABRA2\_Rattus norvegicus SCPLKFGSYAYTTSEVYIWTYNASDSVQVAPDGSRLNQYDLLGQSIGKETIKSSTGEYTVMTAHFHLKRKIGYFVIQTYLPCIMTVILSQVSWFLNRES 278  
P26048|GABRA2\_Mus musculus SCPLKFGSYAYTTSEVYIWTYNASDSVQVAPDGSRLNQYDLLGQSIGKETIKSSTGEYTVMTAHFHLKRKIGYFVIQTYLPCIMTVILSQVSWFLNRES 278  
AOA5F4CYJ7|GABRA2\_Canis lupus familiaris SCPLKFGSYAYTTSEVYIWTYNASDSVQVAPDGSRLNQYDLLGQSIGKETIKSSTGEYTVMTAHFHLKRKIGYFVIQTYLPCIMTVILSQVSWFLNRES 269  
H2QPE5|GABRA2\_Pan troglodytes SCPLKFGSYAYTTSEVYIWTYNASDSVQVAPDGSRLNQYDLLGQSIGKETIKSSTGEYTVMTAHFHLKRKIGYFVIQTYLPCIMTVILSQVSWFLNRES 278  
E7F635|GABRA2a\_Danio rerio SCPLKFGSYAYTTSEVYIWTYNASDSVQVAPDGSRLNQYDLMGQTVGKETIKSSTGEYTVMTAHFHLKRKIGYFVIQTYLPCIMTVILSQVSWFLNRES 278  
XP\_028703913.1|GABRA2\_Macaca mulatta SCPLKFGSYAYTTSEVYIWTYNASDSVQVAPDGSRLNQYDLLGQSIGKETIKSSTGEYTVMTAHFHLKRKIGYFVIQTYLPCIMTVILSQVSWFLNRES 278  
P10063|GABRA2\_Bos taurus SCPLKFGSYAYTTSEVYIWTYNASDSVQVAPDGSRLNQYDLPQSIGKETIKSSTGEYTVMTAHFHLKRKIGYFVIQTYLPCIMTVILSQVSWFLNRES 278  
.....210.....220.....230.....240.....250.....260.....270.....280.....290.....300

\*\*\*\*\*:\*\*\*\*\*:\*\*\*\*\*:\*\*\*\*\* \*\*\*\*\*:\*\*\*\*\* \*\*\*\*\*:\*\*\*\*\* \*\*\*\*\*:\*\*\*\*\* \*\*\*\*\*:\*\*\*\*\* \*\*\*\*\*:\*\*\*\*\* \*\*\*\*\*:\*\*\*\*\* \*\*\*\*\*:\*\*\*\*\* \*\*\*\*\*:\*\*\*\*\*

P47869|GABRA2\_Homo sapiens VPARTVFGVTTVLTMTTILSISARNSLPKVAYATAMDWFIACVYAFVFSALIEFATVNYFTKRGAWDGKSVVNDKKEKASVMIQNNAYAVAVANYAPNL 378  
XP\_003816076.1|GABRA2\_Pan\_paniscus VPARTVFGVTTVLTMTTILSISARNSLPKVAYATAMDWFIACVYAFVFSALIEFATVNYFTKRGAWDGKSVVNDKKEKASVMIQNNAYAVAVANYAPNL 378  
M3Y0V9|GABRA2\_Mustela putorius furo VPARTVFGVTTVLTMTTILSISARNSLPKVAYATAMDWFIACVYAFVFSALIEFATVNYFTKRGAWDGKSVVNDKKEKASVMIQNNAYAVAVANYAPNL 400  
P23576|GABRA2\_Rattus norvegicus VPARTVFGVTTVLTMTTILSISARNSLPKVAYATAMDWFIACVYAFVFSALIEFATVNYFTKRGAWDGKSVVNDKKEKASVMIQNNAYAVAVANYAPNL 378  
P26048|GABRA2\_Mus musculus VPARTVFGVTTVLTMTTILSISARNSLPKVAYATAMDWFIACVYAFVFSALIEFATVNYFTKRGAWDGKSVVNDKKEKASVMIQNNAYAVAVANYAPNL 378  
AOA5F4CYJ7|GABRA2\_Canis lupus familiaris VPARTVFGVTTVLTMTTILSISARNSLPKVAYATAMDWFIACVYAFVFSALIEFATVNYFTKRGAWDGKSVVNDKKEKASVMIQNNAYAVAVANYAPNL 369  
H2QPE5|GABRA2\_Pan troglodytes VPARTVFGVTTVLTMTTILSISARNSLPKVAYATAMDWFIACVYAFVFSALIEFATVNYFTKRGAWDGKSVVNDKKEKASVMIQNNAYAVAVANYAPNL 378  
E7F635|GABRA2a\_Danio rerio VPARTVFGVTTVLTMTTILSISARNSLPKVAYATAMDWFIACVYAFVFSALIEFATVNYFTKRGAWDGKSVVNDKKEKASVMIQNNAYAVAVANYAPHI 377  
XP\_028703913.1|GABRA2\_Macaca mulatta VPARTVFGVTTVLTMTTILSISARNSLPKVAYATAMDWFIACVYAFVFSALIEFATVNYFTKRGAWDGKSVVNDKKEKASVMIQNNAYAVAVANYAPNL 378  
P10063|GABRA2\_Bos taurus VPARTVFGVTTVLTMTTILSISARNSLPKVAYATAMDWFIACVYAFVFSALIEFATVNYFTKRGAWDGKSVVNDKKEKASVMIQNNAYAVAVANYAPNL 378  
.....310.....320.....330.....340.....350.....360.....370.....380.....390.....400

:\*.\*.\*:\*\*\*\* \*\*\*\*\*. \*. : \* :\*\*\*\*\*:\*\*\*\*\*:\*\*\*\*\*:\*\*\*\*\* \*\*\*\*\*:\*\*\*\*\* \*\*\*\*\*:\*\*\*\*\* \*\*\*\*\*:\*\*\*\*\* \*\*\*\*\*:\*\*\*\*\* \*\*\*\*\*:\*\*\*\*\*

P47869|GABRA2\_Homo sapiens SKDPVLTSTISKSATTPENKPKPENKPAEAKKTFNSVSKIDRMSRIVFPVLFGLFNLVYWATYLNREPVL-GVSP-- 451  
XP\_003816076.1|GABRA2\_Pan\_paniscus SKDPVLTSTISKSATTPENKPKPENKPAEAKKTFNSVSKIDRMSRIVFPVLFGLFNLVYWATYLNREPVL-GVSP-- 451  
M3Y0V9|GABRA2\_Mustela putorius furo SKDPVLTSTISKSATTPENKPKPENKPAEAKKTFNSVSKIDRMSRIVFPVLFGLFNLVYWATYLNREPVL-GVSP-- 473  
P23576|GABRA2\_Rattus norvegicus SKDPVLTSTISKSATTPENKPKPENKPAEAKKTFNSVSKIDRMSRIVFPVLFGLFNLVYWATYLNREPVL-GVSP-- 451  
P26048|GABRA2\_Mus musculus SKDPVLTSTISKSATTPENKPKPENKPAEAKKTFNSVSKIDRMSRIVFPVLFGLFNLVYWATYLNREPVL-GVSP-- 451  
AOA5F4CYJ7|GABRA2\_Canis lupus familiaris SKDPVLTSTISKSATTPENKPKPENKPAEAKKTFNSVSKIDRMSRIVFPVLFGLFNLVYWATYLNREPVL-GVSP-- 442  
H2QPE5|GABRA2\_Pan troglodytes SKDPVLTSTISKSATTPENKPKPENKPAEAKKTFNSVSKIDRMSRIVFPVLFGLFNLVYWATYLNREPVL-GVSP-- 451  
E7F635|GABRA2a\_Danio rerio AKDSALPTVSKSA-TPEPS-KAQPVAKETKKTFNSVSKIDRMSRIIFPVLFGLFNLVYWATYLNREPVIKMNVPSP 451  
XP\_028703913.1|GABRA2\_Macaca mulatta SKDPVLTSTISKSATTPENKPKPENKPAEAKKTFNSVSKIDRMSRIVFPVLFGLFNLVYWATYLNREPVL-GVSP-- 451  
P10063|GABRA2\_Bos taurus SKDPVLTSTISKSATTPENKPKPENKPAEAKKTFNSVSKIDRMSRIVFPVLFGLFNLVYWATYLNREPVL-GVSP-- 451  
.....410.....420.....430.....440.....450.....460.....470.....

```

::: * * *****:****:****
P34903|GABRA3 Homo sapiens MIITQTSHCYMTSLGILFLNINLPGTTGQGESRRQEPGDFVKQDIGGLSPKHAPDIPDDSTDNITIFTRILDRLLDGYDNRLRPGLGDAVEVKTDIYVT 100
A0A2R9AHX2|GABRA3 Pan paniscus MIITQTSHCYMTSLGILFLNINLPGTTGQGESRRQEPGDFVKQDIGGLSPKHAPDIPDDSTDNITIFTRILDRLLDGYDNRLRPGLGDAVEVKTDIYVT 100
H2QZ88|GABRA3 Pan troglodytes MIITQTSHCYMTSLGILFLNINLPGTTGQGESRRQEPGDFVKQDIGGLSPKHAPDIPDDSTDNITIFTRILDRLLDGYDNRLRPGLGDAVEVKTDIYVT 100
F7G8R5|GABRA3 Macaca mulatta MIITQMSHYMTSLGILFLNINLPGTTGQGESRRQEPGDFVKQDIGGLSPKHAPDIPDDSTDNITIFTRILDRLLDGYDNRLRPGLGDAVEVKTDIYVT 100
M3YJX4|GABRA3 Mustela putorius furo MIVTQMSHFYITSLGFLFLNIFPGITGQGESRRQEPGDFVKQDIGGLSPKHAPDIPDDSTDNITIFTRILDRLLDGYDNRLRPGLGDAVEVKTDIYVT 100
P20236|GABRA3 Rattus norvegicus MIITQMWHFYIVRVGLLLLSILPGTTGQGESRRQEPGDFVKQDIGGLSPKHAPDIPDDSTDNITIFTRILDRLLDGYDNRLRPGLGDAVEVKTDIYVT 100
P26049|GABRA3 Mus musculus MIITQMWHFYIVRVGLLLLSILPGTTGQGESRRQEPGDFVKQDIGGLSPKHAPDIPDDSTDNITIFTRILDRLLDGYDNRLRPGLGDAVEVKTDIYVT 100
E2QVJ7|GABRA3 Canis lupus familiaris MIVTQMSHFYITILGLLFLNIFPGITGQGESRRQEPGDFVKQDIGGLSPKHAPDIPDDSTDNITIFTRILDRLLDGYDNRLRPGLGDAVEVKTDIYVT 100
A0A2R8QC15|GABRA3 Danio rerio -----HRAVTG----HREPIPDSSKDNITIFTRILDRLLDGYDNRLRPGLGESVTEVRTNIYVT 55
P10064|GABRA3 Bos taurus MIITQMSQFYMAGLGLLFLNINLPGTTGQVESRRQEPGDFVKQDIGGLSPKHAPDIPDDSTDNITIFTRILDRLLDGYDNRLRPGLGDAVEVKTDIYVT 100
1.....10.....20.....30.....40.....50.....60.....70.....80.....90.....100

```

```

*****:****:****
P34903|GABRA3 Homo sapiens SFGPVSDTDMEYTDVFFRQVHDERLKFDPGPKILPLNLLASKIWTPTDFFHNGKKSVAHNMTTPNKLLRLVDNGTLLYTMRLTIHAECPMHLEDFPM 200
A0A2R9AHX2|GABRA3 Pan paniscus SFGPVSDTDMEYTDVFFRQVHDERLKFDPGPKILPLNLLASKIWTPTDFFHNGKKSVAHNMTTPNKLLRLVDNGTLLYTMRLTIHAECPMHLEDFPM 200
H2QZ88|GABRA3 Pan troglodytes SFGPVSDTDMEYTDVFFRQVHDERLKFDPGPKILPLNLLASKIWTPTDFFHNGKKSVAHNMTTPNKLLRLVDNGTLLYTMRLTIHAECPMHLEDFPM 200
F7G8R5|GABRA3 Macaca mulatta SFGPVSDTDMEYTDVFFRQVHDERLKFDPGPKILPLNLLASKIWTPTDFFHNGKKSVAHNMTTPNKLLRLVDNGTLLYTMRLTIHAECPMHLEDFPM 200
M3YJX4|GABRA3 Mustela putorius furo SFGPVSDTDMEYTDVFFRQVHDERLKFDPGPKILPLNLLASKIWTPTDFFHNGKKSVAHNMTTPNKLLRLVDNGTLLYTMRLTIHAECPMHLEDFPM 200
P20236|GABRA3 Rattus norvegicus SFGPVSDTDMEYTDVFFRQVHDERLKFDPGPKILPLNLLASKIWTPTDFFHNGKKSVAHNMTTPNKLLRLVDNGTLLYTMRLTIHAECPMHLEDFPM 200
P26049|GABRA3 Mus musculus SFGPVSDTDMEYTDVFFRQVHDERLKFDPGPKILPLNLLASKIWTPTDFFHNGKKSVAHNMTTPNKLLRLVDNGTLLYTMRLTIHAECPMHLEDFPM 200
E2QVJ7|GABRA3 Canis lupus familiaris SFGPVSDTDMEYTDVFFRQVHDERLKFDPGPKILPLNLLASKIWTPTDFFHNGKKSVAHNMTTPNKLLRLVDNGTLLYTMRLTIHAECPMHLEDFPM 200
A0A2R8QC15|GABRA3 Danio rerio SFGPVSDTDMEYTDVFFRQVHDERLKFDPGPKILPLNLLASKIWTPTDFFHNGKKSVAHNMTTPNKLLRLVDNGTLLYTMRLTIHAECPMHLEDFPM 155
P10064|GABRA3 Bos taurus SFGPVSDTDMEYTDVFFRQVHDERLKFDPGPKILPLNLLASKIWTPTDFFHNGKKSVAHNMTTPNKLLRLVDNGTLLYTMRLTIHAECPMHLEDFPM 200
.....110.....120.....130.....140.....150.....160.....170.....180.....190.....200

```

```

* *****:****:****
P34903|GABRA3 Homo sapiens DVHACPLKFGSYAYTTAEVVSWSLTKGKNSVEVAQDGSRLNQYDLLGHVVGTEIIRSSSTGEYVMTTFHFLKRRKIGYFVIQTYLPCIMTVILSQVSWFWLN 300
A0A2R9AHX2|GABRA3 Pan paniscus DVHACPLKFGSYAYTTAEVVSWSLTKGKNSVEVAQDGSRLNQYDLLGHVVGTEIIRSSSTGEYVMTTFHFLKRRKIGYFVIQTYLPCIMTVILSQVSWFWLN 300
H2QZ88|GABRA3 Pan troglodytes DVHACPLKFGSYAYTTAEVVSWSLTKGKNSVEVAQDGSRLNQYDLLGHVVGTEIIRSSSTGEYVMTTFHFLKRRKIGYFVIQTYLPCIMTVILSQVSWFWLN 300
F7G8R5|GABRA3 Macaca mulatta DVHACPLKFGSYAYTTAEVVSWSLTKGKNSVEVAQDGSRLNQYDLLGHVVGTEIIRSSSTGEYVMTTFHFLKRRKIGYFVIQTYLPCIMTVILSQVSWFWLN 300
M3YJX4|GABRA3 Mustela putorius furo DVHACPLKFGSYAYTTAEVVSWSLTKGKNSVEVAQDGSRLNQYDLLGHVVGTEIIRSSSTGEYVMTTFHFLKRRKIGYFVIQTYLPCIMTVILSQVSWFWLN 300
P20236|GABRA3 Rattus norvegicus DVHACPLKFGSYAYTTAEVVSWSLTKGKNSVEVAQDGSRLNQYDLLGHVVGTEIIRSSSTGEYVMTTFHFLKRRKIGYFVIQTYLPCIMTVILSQVSWFWLN 300
P26049|GABRA3 Mus musculus DVHACPLKFGSYAYTTAEVVSWSLTKGKNSVEVAQDGSRLNQYDLLGHVVGTEIIRSSSTGEYVMTTFHFLKRRKIGYFVIQTYLPCIMTVILSQVSWFWLN 300
E2QVJ7|GABRA3 Canis lupus familiaris DVHACPLKFGSYAYTTAEVVSWSLTKGKNSVEVAQDGSRLNQYDLLGHVVGTEIIRSSSTGEYVMTTFHFLKRRKIGYFVIQTYLPCIMTVILSQVSWFWLN 300
A0A2R8QC15|GABRA3 Danio rerio DAHACPLKFGSYAYTTAEVVSWSLTKGKNSVEVAQDGSRLNQYDLLGHVVGTEIIRSSSTGEYVMTTFHFLKRRKIGYFVIQTYLPCIMTVILSQVSWFWLN 255
P10064|GABRA3 Bos taurus DVHACPLKFGSYAYTTAEVVSWSLTKGKNSVEVAQDGSRLNQYDLLGHVVGTEIIRSSSTGEYVMTTFHFLKRRKIGYFVIQTYLPCIMTVILSQVSWFWLN 300
.....210.....220.....230.....240.....250.....260.....270.....280.....290.....300

```

```

*****:****:****
P34903|GABRA3 Homo sapiens RESVPARTVFGVTTVLMTTSLISARNSLPKVAYATAMDWFIACVYAFVFSALIEFATVNYFTKRSAWEGKKVPEALEMCKKTPAAPAKKTSTTFNIVG 400
A0A2R9AHX2|GABRA3 Pan paniscus RESVPARTVFGVTTVLMTTSLISARNSLPKVAYATAMDWFIACVYAFVFSALIEFATVNYFTKRSAWEGKKVPEALEMCKKTPAAPAKKTSTTFNIVG 400
H2QZ88|GABRA3 Pan troglodytes RESVPARTVFGVTTVLMTTSLISARNSLPKVAYATAMDWFIACVYAFVFSALIEFATVNYFTKRSAWEGKKVPEALEMCKKTPAAPAKKTSTTFNIVG 400
F7G8R5|GABRA3 Macaca mulatta RESVPARTVFGVTTVLMTTSLISARNSLPKVAYATAMDWFIACVYAFVFSALIEFATVNYFTKRSAWEGKKVPEALEMCKKTPAAPAKKTSTTFNIVG 400
M3YJX4|GABRA3 Mustela putorius furo RESVPARTVFGVTTVLMTTSLISARNSLPKVAYATAMDWFIACVYAFVFSALIEFATVNYFTKRSAWEGKKVPEALEMCKKTPAAPAKKTSTTFNIVG 400
P20236|GABRA3 Rattus norvegicus RESVPARTVFGVTTVLMTTSLISARNSLPKVAYATAMDWFIACVYAFVFSALIEFATVNYFTKRSAWEGKKVPEALEMCKKTPAAPAKKTSTTFNIVG 400
P26049|GABRA3 Mus musculus RESVPARTVFGVTTVLMTTSLISARNSLPKVAYATAMDWFIACVYAFVFSALIEFATVNYFTKRSAWEGKKVPEALEMCKKTPAAPAKKTSTTFNIVG 399
E2QVJ7|GABRA3 Canis lupus familiaris RESVPARTVFGVTTVLMTTSLISARNSLPKVAYATAMDWFIACVYAFVFSALIEFATVNYFTKRSAWEGKKVPEALEMCKKTPAAPAKKTSTTFNIVG 400
A0A2R8QC15|GABRA3 Danio rerio RESVPARTVFGKS-----FF----- 270
P10064|GABRA3 Bos taurus RESVPARTVFGVTTVLMTTSLISARNSLPKVAYATAMDWFMAVCYAFVFSALIEFATVNYFTKRSAWEGKKVPEALEMCKKTPAVPTKKTSTTFNIVG 400
.....310.....320.....330.....340.....350.....360.....370.....380.....390.....400

```

```

** * :**
P34903|GABRA3 Homo sapiens TYPINLAKDTEFSTISK-GAAPSASSTPTIIASPKATVYVQDPTETKTYNSVSKVDKISRIFPVLFVFAIFNLVYWAYTVNRESAIKGMIRKQ 492
A0A2R9AHX2|GABRA3 Pan paniscus TYPINLAKDTEFSTISK-GAAPSASSTPTIIASPKATVYVQDPTETKTYNSVSKVDKISRIFPVLFVFAIFNLVYWAYTVNRESAIKGMIRKQ 492
H2QZ88|GABRA3 Pan troglodytes TYPINLAKDTEFSTISK-GAAPSASSTPTIIASPKATVYVQDPTETKTYNSVSKVDKISRIFPVLFVFAIFNLVYWAYTVNRESAIKGMIRKQ 492
F7G8R5|GABRA3 Macaca mulatta TYPINLAKDTEFSTISK-GAAPSASSTPTIIASPKATVYVQDPTETKTYNSVSKVDKISRIFPVLFVFAIFNLVYWAYTVNRESAIKGMIRKQ 492
M3YJX4|GABRA3 Mustela putorius furo TYPINLAKDTEFSTISK-GAAPSASSTPTIIASPKATVYVQDPTETKTYNSVSKVDKISRIFPVLFVFAIFNLVYWAYTVNRESAIKGMIRKH 492
P20236|GABRA3 Rattus norvegicus TYPINLAKDTEFSTISKAAPASSTPTIIASPKATVYVQDPTETKTYNSVSKVDKISRIFPVLFVFAIFNLVYWAYTVNRESAIKGMIRKQ 493
P26049|GABRA3 Mus musculus TYPINLAKDTEFSTISKAAPASSTPTIIASPKATVYVQDPTETKTYNSVSKVDKISRIFPVLFVFAIFNLVYWAYTVNRESAIKGMIRKQ 492
E2QVJ7|GABRA3 Canis lupus familiaris TYPINLAKDTEFSTISK-GAAPSASSTPTIIASPKATVYVQDPTETKTYNSVSKVDKISRIFPVLFVFAIFNLVYWAYTVNRESAIKGMIRKH 492
A0A2R8QC15|GABRA3 Danio rerio --YP-----FAVY----- 277
P10064|GABRA3 Bos taurus TYPINLAKDTEFSAISK-GAAPSTSTPTIIASPKATVYVQDPTETKTYNSVSKVDKISRIFPVLFVFAIFNLVYWAYTVNRESAIKGMIRKQ 492
.....410.....420.....430.....440.....450.....460.....470.....480.....490...

```

P48169|GABRA4 Homo sapiens MVS AKKVP AIALSAGVS FALLRFLCLAVCLNES PGQNK EEKLC TENFTRILDS LLDGYDNRLRPGF GGPVTEVKTDIYVTSFGPVS DVEMEYTM DVVFR 100  
A0A2R9C6M3|GABRA4 Pan paniscus MVS AKKVP AIALSAGVS FALLRFLCLAVCLNES PGQNK EEKLC TENFTRILDS LLDGYDNRLRPGF GGPVTEVKTDIYVTSFGPVS DVEMEYTM DVVFR 100  
H2QPE7|GABRA4 Pan troglodytes MVS AKKVP AIALSAGVS FALLRFLCLAVCLNES PGQNK EEKLC TENFTRILDS LLDGYDNRLRPGF GGPVTEVKTDIYVTSFGPVS DVEMEYTM DVVFR 100  
F6YLN4|GABRA4 Macaca mulatta MVS AKKVP AIALSAGVS FALLRFLCLAVCLNES PGQNK EEKLC TENFTRILDS LLDGYDNRLRPGF GGPVTEVKTDIYVTSFGPVS DVEMEYTM DVVFR 100  
M3Y0X5|GABRA4 Mustela putorius furo MVS AKKVP AIALSAGVS FALLRFLCLAVCLNES PGQNK EEKLC TENFTRILDS LLDGYDNRLRPGF GGPVTEVKTDIYVTSFGPVS DVEMEYTM DVVFR 100  
P28471|GABRA4 Rattus norvegicus MVS VQKVP AIVLCSGVS LALLHLVCLATCLNES PGQNSK DEKLC PENFTRILDS LLDGYDNRLRPGF GGPVTEVKTDIYVTSFGPVS DVEMEYTM DVVFR 100  
Q9D6F4|GABRA4 Mus musculus MVS VQKVP AIALCSGVS LALLHLVCLAVCLNES PGQNSK DEKLC PENFTRILDS LLDGYDNRLRPGF GGPVTEVKTDIYVTSFGPVS DVEMEYTM DVVFR 100  
F1P9P9|GABRA4 Canis lupus familiaris -----MVMTTGCALDLGGLLSLVSHV--LPLEKGRGK-----GPVTEVKTDIYVTSFGPVS DVEMEYTM DVVFR 62  
Q568M9|GABRA4 Danio rerio MVS AKKEMV TAMYPTS I S T LLYFLCVAACIKRISGQ IRRKDEKLYPENFTRILDRLLDGYDNRLRPGF GGPVTEVKTDIYVTSFGPVS DVEMEYTM DVVFR 100  
P20237|GABRA4 Bos taurus MVS AKKVP AIALSAGVS FALLRFLCLAVCLNES PGQNK EEKLC TENFTRILDS LLDGYDNRLRPGF GGPVTEVKTDIYVTSFGPVS DVEMEYTM DVVFR 100  
1.....10.....20.....30.....40.....50.....60.....70.....80.....90.....100

\*\*\*:\*\*\*:\*\*\*:\*\*\*\*\*:\*\*\*\*\*:\*\*\*:\*\*\*\*\*:\*\*\*\*\*:\*\*\*\*\*:\*\*\*\*\*:\*\*\*\*\*:\*\*\*\*\*:\*\*\*\*\*:\*\*\*:\*\*\*\*\*:\*\*\*  
P48169|GABRA4 Homo sapiens QTWIDKRLKYDGP I E I L R L N M M V T K V W I P D T F F R N G K K S V S H N M T A P N K L F R I M R N G T I L Y T M R L T I S A E C P M R L V D F P M D G H A C P L K F G S Y A Y P K S E M 200  
A0A2R9C6M3|GABRA4 Pan paniscus QTWIDKRLKYDGP I E I L R L N M M V T K V W I P D T F F R N G K K S V S H N M T A P N K L F R I M R N G T I L Y T M R L T I S A E C P M R L V D F P M D G H A C P L K F G S Y A Y P K S E M 200  
H2QPE7|GABRA4 Pan troglodytes QTWIDKRLKYDGP I E I L R L N M M V T K V W I P D T F F R N G K K S V S H N M T A P N K L F R I M R N G T I L Y T M R L T I S A E C P M R L V D F P M D G H A C P L K F G S Y A Y P K S E M 200  
F6YLN4|GABRA4 Macaca mulatta QTWIDKRLKYDGP I E I L R L N M M V T K V W I P D T F F R N G K K S V S H N M T A P N K L F R I M R N G T I L Y T M R L T I S A E C P M R L V D F P M D G H A C P L K F G S Y A Y P K S E M 200  
M3Y0X5|GABRA4 Mustela putorius furo QTWIDKRLKYDGP I E I L R L N M M V T K V W I P D T F F R N G K K S V S H N M T A P N K L F R I M R N G T I L Y T M R L T I S A E C P M R L V D F P M D G H A C P L K F G S Y A Y P K S E M 200  
P28471|GABRA4 Rattus norvegicus QTWIDKRLKYDGP I E I L R L N M M V T K V W I P D T F F R N G K K S V S H N M T A P N K L F R I M R N G T I L Y T M R L T I S A E C P M R L V D F P M D G H A C P L K F G S Y A Y P K S E M 200  
Q9D6F4|GABRA4 Mus musculus QTWIDKRLKYDGP I E I L R L N M M V T K V W I P D T F F R N G K K S V S H N M T A P N K L F R I M R N G T I L Y T M R L T I S A E C P M R L V D F P M D G H A C P L K F G S Y A Y P K S E M 200  
F1P9P9|GABRA4 Canis lupus familiaris QTWIDKRLKYDGP I E I L R L N M M V T K V W I P D T F F R N G K K S V S H N M T A P N K L F R I M R N G T I L Y T M R L T I S A E C P M R L V D F P M D G H A C P L K F G S Y A Y P K S E M 162  
Q568M9|GABRA4 Danio rerio QTWVDRRLRYEGPVEI L R L N M M V T K V W I P D T F F R N G K R S V A H N M T A P N R L F R I M R N G T I L Y T M R L T I S A E C P M R L V D F P M D G H S C P L K F G S Y A Y P K T E M 200  
P20237|GABRA4 Bos taurus QTWIDKRLKYDGP I E I L R L N M M V T K V W I P D T F F R N G K K S V S H N M T A P N K L F R I M R N G T I L Y T M R L T I S A E C P M R L V D F P M D G H A C P L K F G S Y A Y P K S E M 200  
.....110.....120.....130.....140.....150.....160.....170.....180.....190.....200

\*\*\*\*\*:\*\*\*\*\*:\*\*\*\*\*:\*\*\*\*\*:\*\*\*\*\*:\*\*\*\*\*:\*\*\*\*\*:\*\*\*\*\*:\*\*\*\*\*:\*\*\*\*\*:\*\*\*\*\*:\*\*\*\*\*:\*\*\*\*\*:\*\*\*\*\*:\*\*\*\*\*:\*\*\*\*\*  
P48169|GABRA4 Homo sapiens IYTWTKGPEKSEVVPKES S L V Q Y D L I G Q T V S S E T I K S I T G E Y I V M T V Y F H L R R K M G Y F M I Q T Y I P C I M T V I L S Q V S F W I N K E S V P A R T V F G I T T V L T M T 300  
A0A2R9C6M3|GABRA4 Pan paniscus IYTWTKGPEKSEVVPKES S L V Q Y D L I G Q T V S S E T I K S I T G E Y I V M T V Y F H L R R K M G Y F M I Q T Y I P C I M T V I L S Q V S F W I N K E S V P A R T V F G I T T V L T M T 300  
H2QPE7|GABRA4 Pan troglodytes IYTWTKGPEKSEVVPKES S L V Q Y D L I G Q T V S S E T I K S I T G E Y I V M T V Y F H L R R K M G Y F M I Q T Y I P C I M T V I L S Q V S F W I N K E S V P A R T V F G I T T V L T M T 300  
F6YLN4|GABRA4 Macaca mulatta IYTWTKGPEKSEVVPKES S L V Q Y D L I G Q T V S S E T I K S I T G E Y I V M T V Y F H L R R K M G Y F M I Q T Y I P C I M T V I L S Q V S F W I N K E S V P A R T V F G I T T V L T M T 300  
M3Y0X5|GABRA4 Mustela putorius furo IYTWTKGPEKSEVVPKES S L V Q Y D L I G Q T V S S E T I K S I T G E Y I V M T V Y F H L R R K M G Y F M I Q T Y I P C I M T V I L S Q V S F W I N K E S V P A R T V F G I T T V L T M T 300  
P28471|GABRA4 Rattus norvegicus IYTWTKGPEKSEVVPKES S L V Q Y D L I G Q T V S S E T I K S I T G E Y I V M T V Y F H L R R K M G Y F M I Q T Y I P C I M T V I L S Q V S F W I N K E S V P A R T V F G I T T V L T M T 300  
Q9D6F4|GABRA4 Mus musculus IYTWTKGPEKSEVVPKES S L V Q Y D L I G Q T V S S E T I K S I T G E Y I V M T V Y F H L R R K M G Y F M I Q T Y I P C I M T V I L S Q V S F W I N K E S V P A R T V F G I T T V L T M T 300  
F1P9P9|GABRA4 Canis lupus familiaris IYTWTKGPEKSEVVPKES S L V Q Y D L I G Q T V S S E T I K S I T G E Y I V M T V Y F H L R R K M G Y F M I Q T Y I P C I M T V I L S Q V S F W I N K E S V P A R T V F G I T T V L T M T 262  
Q568M9|GABRA4 Danio rerio IYTWTKGP H S V E V P P E S S L V Q Y D L I G Q T V S S E T V K S I T G E Y I V M T V Y F H L R R K M G Y F M I Q T Y I P C I M T V I L S Q V S F W I N K E S V P A R T V F G I T T V L T M T 300  
P20237|GABRA4 Bos taurus IYTWTKGPEKSEVVPKES S L V Q Y D L I G Q T V S S E T I K S I T G E Y I V M T V Y F H L R R K M G Y F M I Q T Y I P C I M T V I L S Q V S F W I N K E S V P A R T V F G I T T V L T M T 300  
.....210.....220.....230.....240.....250.....260.....270.....280.....290.....300

\*\*\*\*\*:\*\*\*\*\*:\*\*\*\*\*:\*\*\*\*\*:\*\*\*\*\*:\*\*\*\*\*:\*\*\*\*\*:\*\*\*\*\*:\*\*\*\*\*:\*\*\*\*\*:\*\*\*\*\*:\*\*\*\*\*:\*\*\*\*\*:\*\*\*\*\*:\*\*\*\*\*:\*\*\*\*\*  
P48169|GABRA4 Homo sapiens T L S I S A R H S L P K V S Y A T A M D W F I A V C F A F V F S A L I E F A A V N Y F T N I Q M E K A K R K T S K P P Q E V P A - A P V Q R E K H P E A P L - Q N T N A N L N M R K R T N A L V -- H S 396  
A0A2R9C6M3|GABRA4 Pan paniscus T L S I S A R H S L P K V S Y A T A M D W F I A V C F A F V F S A L I E F A A V N Y F T N I Q M E K A K R K T S K P P Q E V P A - A P V Q R E K H P E A P L - Q N T N A N L N M R K R T N A L V -- H S 396  
H2QPE7|GABRA4 Pan troglodytes T L S I S A R H S L P K V S Y A T A M D W F I A V C F A F V F S A L I E F A A V N Y F T N I Q M E K A K R K T S K P P Q E V P A - A P V Q R E K H P E A P L - Q N T N A N L N M R K R T N A L V -- H S 396  
F6YLN4|GABRA4 Macaca mulatta T L S I S A R H S L P K V S Y A T A M D W F I A V C F A F V F S A L I E F A A V N Y F T N I Q M E K A K R K T S K P P Q E V P A - A P V Q R E K H P E A P L - Q N T N A N L N M R K R T N A S V -- H S 396  
M3Y0X5|GABRA4 Mustela putorius furo T L S I S A R H S L P K V S Y A T A M D W F I A V C F A F V F S A L I E F A A V N Y F T N V Q M A K A K R K S S K A L Q E I P A - A P V Q R E K P P E A P L - Q N T N A N L N M R K R T N A S V -- H S 396  
P28471|GABRA4 Rattus norvegicus T L S I S A R H S L P K V S Y A T A M D W F I A V C F A F V F S A L I E F A A V N Y F T N I Q M Q A K K K I S K P P P E V P A - A P V L K E K H T E T S L - Q N T H A N L N M R K R T N A L V -- H S 396  
Q9D6F4|GABRA4 Mus musculus T L S I S A R H S L P K V S Y A T A M D W F I A V C F A F V F S A L I E F A A V N Y F T N I Q M Q A K K K I S K P P P E V P A - A P V L K E K H T E T S L - Q N T H A N L N M R K R T N A L V -- H S 396  
F1P9P9|GABRA4 Canis lupus familiaris T L S I S A R H S L P K V S Y A T A M D W F I A V C F A F V F S A L I E F A A V N Y F T N I Q M E K A K R K S S K A L Q E I P A - A P V Q R E K H P E A P L - Q N T N A N L N M R K R T N A S V -- H S 358  
Q568M9|GABRA4 Danio rerio T L S I S A R H S L P K V S Y A T A M D W F I A V C F A F V F S A L I E F A A V N Y F T N A Q A E R A K R K Q A K A A A A S V S S T G K N K D T E V L Q O N S D T N G N L R K R V N S N I Q P Q A 400  
P20237|GABRA4 Bos taurus T L S I S A R H S L P K V S Y A T A M D W F I A V C F A F V F S A L I E F A A V N Y F T N V Q M E K A K R K T S K A P Q E I S A - A P V L R E K H P E T P L - Q N T N A N L S M R K R A N A L V -- H S 396  
.....310.....320.....330.....340.....350.....360.....370.....380.....390.....400

\*\*\*:\*\*\*:\*\*\*:\*\*\*\*\*:\*\*\*\*\*:\*\*\*:\*\*\*\*\*:\*\*\*\*\*:\*\*\*\*\*:\*\*\*\*\*:\*\*\*\*\*:\*\*\*\*\*:\*\*\*\*\*:\*\*\*:\*\*\*\*\*:\*\*\*  
P48169|GABRA4 Homo sapiens E S D V G N R T E V --- G N H S S K S S T V V Q E S S K G T P R S Y L A S --- S P N P F S R A N A A E T I S - A A R A L P S A S P T S -- I R T G Y M P R K A S V G S A S T R H V F G S R L Q R 485  
A0A2R9C6M3|GABRA4 Pan paniscus E S D V G N R T E V --- G N H S S K S S T V V Q E S S K G T P R S Y L A S --- S P N P F S R A N A A E T I S - A A R A L P S A S P T S -- I R T G Y M P R K A S V G S A S T R H V F G S R L Q R 485  
H2QPE7|GABRA4 Pan troglodytes E S D V G N R T E V --- G N H S S K S S T V V Q E S S K G T P R S Y L A S --- S P N P F S R A N A A E T I S - A A R A L P S A S P T S -- I R T G Y M P R K A S V G S A S T R H V F G S R L Q R 485  
F6YLN4|GABRA4 Macaca mulatta E S D V G N R T E V --- G N H S S K S S T V V Q E S S K G T P R S Y L A S --- S P N P F S R A N A A E T I S - A A R A L P S A S P T S -- I R T G Y M P R K A S V G S A S T R H V F G S R L Q R 485  
M3Y0X5|GABRA4 Mustela putorius furo E S D A G H R T E V --- G N H S S K S S S V T Q G S S E A T P Q S Y L A S --- S P N P F S H P N A A E T I S - A A R A P L S A P P S T P - G R T G Y V S Q K --- A S T R H V F G S R L R 481  
P28471|GABRA4 Rattus norvegicus E S D V N S R T E V --- G N H S S K - T T A A Q E S S E T T P K A H L A S --- S P N P F S R A N A A E T I S A A A R G L S S A A S P S --- P H G T L - Q P A P I R S A A R P A F G A R L G R 483  
Q9D6F4|GABRA4 Mus musculus E S D V K S R T E V --- G N H S S K - T S A V Q E S S E A T P K A H L A S --- S P N P F S R A N A A E T M S A A A R G L S S A A S P S --- P H G T L - R P A S L G S A S T R P A F G S R L G R 483  
F1P9P9|GABRA4 Canis lupus familiaris E S D V G N R T E V --- G N H S S K S S T V I Q G S S E A T P Q S Y L A A --- S P N P F S H A N A A E T I S - A A R A P L S A P S S T P - S R T G Y V S Q Q A S V G S A S T R H V F G S R L R 448  
Q568M9|GABRA4 Danio rerio E S K K T Q R T E A S S K S G A S S K P I L T S Q S S T S E G T S F S S Q S R L P S S A S Q S N A A A S S S A S K I T P P A P P S T P T V P D K P S P G T P A G S A P L H L L G P K L E N 500  
P20237|GABRA4 Bos taurus E S D V G S R T D V --- G N H S S K S S T V V Q G S S E A T P Q S Y L A S --- S P N P F S R A N A A E T I S - A A R A I P S A L P S T P - S R T G Y V P R Q V P V G S A S T O H V F G S R L Q R 486  
.....410.....420.....430.....440.....450.....460.....470.....480.....490.....500

\*\* : .\* : . . : . . . . . \* \* : \* \* \* \* : \* \* \* \* \* \* : \* \* \* \* \* \* \* \* \* \* \* \* \* \* \* \* \* \* \* . :  
 P48169|GABRA4\_Homo\_sapiens IKTTVNTIGATGKLSA-TPPPSAPPPSGSGTSKIDKYARILFPVTFGAFNMVYWVYLSKDTMEKSES LM 554  
 A0A2R9C6M3|GABRA4\_Pan\_paniscus IKTTVNTIGATGKLSA-TPPPSAPPPSGSGTSKIDKYARILFPVTFGAFNMVYWVYLSKDTMEKSES LM 554  
 H2QPE7|GABRA4\_Pan\_troglodytes IKTTVNTIGATGKLSA-TPPPSAPPPSGSGTSKIDKYARILFPVTFGAFNMVYWVYLSKDTMEKSES LM 554  
 F6YLN4|GABRA4\_Macaca\_mulatta IKTTVNTIGATGKLSA-TPPPSAPPPSGSGTSKIDKYARILFPVTFGAFNMVYWVYLSKDTMEKSES LM 554  
 M3Y0X5|GABRA4\_Mustela\_putorius\_furo IKTTVNTIGATGKLSA-TPPPSAPPPSGSGTSKIDKYARILFPVTFGAFNMVYWVYLSKDTMEKSES LM 551  
 P28471|GABRA4\_Rattus\_norvegicus IKTTVNTIGVPGNVSA-TPPPSAPPPSGSGTSKIDKYARILFPVTFGAFNMVYWVYLSKDTMEKSES LM 552  
 Q9D6F4|GABRA4\_Mus\_musculus IKTTVNTIGAGNVSA-TPPPSAPPPSGSGTSKIDKYARILFPVTFGAFNMVYWVYLSKDTMEKSES LM 552  
 F1P9P9|GABRA4\_Canis\_lupus\_familiaris IKTTVNTIGASGKLSA-TTPPSAPPPSGSGTSKIDKYARILFPVTFGAFNMVYWVYLSKDTMEKSES LM 517  
 Q568M9|GABRA4\_Danio\_rerio IK-----KKEAKAQPQPAAPATG-GASKIDEYARILFPVTFGAFNMVYWVYLSKDTMEKGA-- 557  
 P20237|GABRA4\_Bos\_taurus IKTTVNSIGTSGKLSA-TTTPSAPPPSGSGTSKIDKYARILFPVTFGAFNMVYWVYLSKDTMEKSES LM 555  
 .....510.....520.....530.....540.....550.....560.....570











```

:***:***:*****:
P47870|GABRB2_Homo_sapiens      RWSRIFFPVVFSEFFNIVYWLYYVN 512
A0A2R9C8C8|GABRB2_Pan_paniscus  RWSRIFFPVVFSEFFNIVYWLYYVN 512
A0A2J8NKG3|GABRB2_Pan_troglodytes RWSRIFFPVVFSEFFNIVYWLYYVN 512
M3YP67|GABRB2_Mustela_putorius_furo RWSRIFFPVVFSEFFNIVYWLYYVN 512
P63138|GABRB2_Rattus_norvegicus  RWSRIFFPVVFSEFFNIVYWLYYVN 474
P63137|GABRB2_Mus_musculus      RWSRIFFPVVFSEFFNIVYWLYYVN 512
A0A5F4CKV8|GABRB2_Canis_lupus_familiaris RWSRIFFPVVFSEFFNIVYWLYYVN 512
D1LYT2|GABRB2_Macaca_mulatta    RWSRIFFPVVFSEFFNIVYWLYYVN 512
Q9DDD9|GABRB2_Danio_rerio      KWSRMIFPTLSEFFNIVYWLYYVH 519
P0C2W5|GABRB2_Bos_taurus       RWSRIFFPVVFSEFFNIVYWLYYVN 472
.....510.....520.....

```

P28472|GABRB3 Homo sapiens MWGLAGGRLFGIFSA... 100  
A0A2R9BWE5|GABRB3 Pan paniscus ... 23  
A0A2I3THQ1|GABRB3 Pan troglodytes ... 100  
F6ZKJ4|GABRB3 Macaca mulatta ... 100  
M3XNI6|GABRB3 Mustela putorius furo ... 100  
P63079|GABRB3 Rattus norvegicus ... 100  
P63080|GABRB3 Mus musculus ... 100  
J9P3X1|GABRB3 Canis lupus familiaris ... 42  
A0A0R4ILP2|GABRB3 Danio rerio ... 100  
A5D7U6|GABRB3 Bos taurus ... 100  
1.....10.....20.....30.....40.....50.....60.....70.....80.....90.....100

P28472|GABRB3 Homo sapiens GIPLNLTLDNRVADQLWVPD... 200  
A0A2R9BWE5|GABRB3 Pan paniscus ... 123  
A0A2I3THQ1|GABRB3 Pan troglodytes ... 200  
F6ZKJ4|GABRB3 Macaca mulatta ... 200  
M3XNI6|GABRB3 Mustela putorius furo ... 200  
P63079|GABRB3 Rattus norvegicus ... 200  
P63080|GABRB3 Mus musculus ... 200  
J9P3X1|GABRB3 Canis lupus familiaris ... 142  
A0A0R4ILP2|GABRB3 Danio rerio ... 200  
A5D7U6|GABRB3 Bos taurus ... 200  
.....110.....120.....130.....140.....150.....160.....170.....180.....190.....200

P28472|GABRB3 Homo sapiens TGVERIELPQFSIVEHRLVSRNVV... 300  
A0A2R9BWE5|GABRB3 Pan paniscus ... 223  
A0A2I3THQ1|GABRB3 Pan troglodytes ... 300  
F6ZKJ4|GABRB3 Macaca mulatta ... 300  
M3XNI6|GABRB3 Mustela putorius furo ... 300  
P63079|GABRB3 Rattus norvegicus ... 300  
P63080|GABRB3 Mus musculus ... 300  
J9P3X1|GABRB3 Canis lupus familiaris ... 242  
A0A0R4ILP2|GABRB3 Danio rerio ... 300  
A5D7U6|GABRB3 Bos taurus ... 300  
.....210.....220.....230.....240.....250.....260.....270.....280.....290.....300

P28472|GABRB3 Homo sapiens PYVKAIDMYLMGCFVVFVFLALLE... 373  
A0A2R9BWE5|GABRB3 Pan paniscus ... 296  
A0A2I3THQ1|GABRB3 Pan troglodytes ... 373  
F6ZKJ4|GABRB3 Macaca mulatta ... 373  
M3XNI6|GABRB3 Mustela putorius furo ... 373  
P63079|GABRB3 Rattus norvegicus ... 373  
P63080|GABRB3 Mus musculus ... 373  
J9P3X1|GABRB3 Canis lupus familiaris ... 315  
A0A0R4ILP2|GABRB3 Danio rerio ... 400  
A5D7U6|GABRB3 Bos taurus ... 373  
.....310.....320.....330.....340.....350.....360.....370.....380.....390.....400

P28472|GABRB3 Homo sapiens VHNEM--NEVSGGIGDTRNS-AISFD... 470  
A0A2R9BWE5|GABRB3 Pan paniscus ... 393  
A0A2I3THQ1|GABRB3 Pan troglodytes ... 470  
F6ZKJ4|GABRB3 Macaca mulatta ... 470  
M3XNI6|GABRB3 Mustela putorius furo ... 470  
P63079|GABRB3 Rattus norvegicus ... 470  
P63080|GABRB3 Mus musculus ... 470  
J9P3X1|GABRB3 Canis lupus familiaris ... 412  
A0A0R4ILP2|GABRB3 Danio rerio ... 495  
A5D7U6|GABRB3 Bos taurus ... 469  
.....410.....420.....430.....440.....450.....460.....470.....480.....490.....500

```
***
P28472|GABRB3_Homo_sapiens|YVN|473
A0A2R9BWE5|GABRB3_Pan_paniscus|YVN|396
A0A2I3THQ1|GABRB3_Pan_troglodytes|YVN|473
F6ZKJ4|GABRB3_Macaca_mulatta|YVN|473
M3XNI6|GABRB3_Mustela_putorius_furo|YVN|473
P63079|GABRB3_Rattus_norvegicus|YVN|473
P63080|GABRB3_Mus_musculus|YVN|473
J9P3X1|GABRB3_Canis_lupus_familiaris|YVN|415
A0A0R4ILP2|GABRB3_Danio_rerio|YVN|498
A5D7U6|GABRB3_Bos_taurus|YVN|472
...

```

014764|GABRD\_Homo\_sapiens 87  
A0A2R9B726|GABRD\_Pan\_paniscus 100  
A0A2J8K8J4|GABRD\_Pan\_troglodytes 87  
F6QDC4|GABRD\_Macaca\_mulatta 63  
XP\_004768807.1|GABRD\_Mustela\_putorius\_furo 87  
P18506|GABRD\_Rattus\_norvegicus 87  
P22933|GABRD\_Mus\_musculus 87  
E2R3M6|GABRD\_Canis\_lupus\_familiaris 87  
E9QHL0|GABRD\_Danio\_erio 67  
A0A3Q1LQH4|GABRD\_Bos\_taurus 86  
F1QZB5|GABRZ\_Danio\_erio 78

014764|GABRD\_Homo\_sapiens 187  
A0A2R9B726|GABRD\_Pan\_paniscus 200  
A0A2J8K8J4|GABRD\_Pan\_troglodytes 187  
F6QDC4|GABRD\_Macaca\_mulatta 163  
XP\_004768807.1|GABRD\_Mustela\_putorius\_furo 187  
P18506|GABRD\_Rattus\_norvegicus 187  
P22933|GABRD\_Mus\_musculus 187  
E2R3M6|GABRD\_Canis\_lupus\_familiaris 187  
E9QHL0|GABRD\_Danio\_erio 167  
A0A3Q1LQH4|GABRD\_Bos\_taurus 186  
F1QZB5|GABRZ\_Danio\_erio 177

014764|GABRD\_Homo\_sapiens 287  
A0A2R9B726|GABRD\_Pan\_paniscus 300  
A0A2J8K8J4|GABRD\_Pan\_troglodytes 287  
F6QDC4|GABRD\_Macaca\_mulatta 263  
XP\_004768807.1|GABRD\_Mustela\_putorius\_furo 287  
P18506|GABRD\_Rattus\_norvegicus 287  
P22933|GABRD\_Mus\_musculus 287  
E2R3M6|GABRD\_Canis\_lupus\_familiaris 287  
E9QHL0|GABRD\_Danio\_erio 267  
A0A3Q1LQH4|GABRD\_Bos\_taurus 286  
F1QZB5|GABRZ\_Danio\_erio 276

014764|GABRD\_Homo\_sapiens 380  
A0A2R9B726|GABRD\_Pan\_paniscus 393  
A0A2J8K8J4|GABRD\_Pan\_troglodytes 380  
F6QDC4|GABRD\_Macaca\_mulatta 358  
XP\_004768807.1|GABRD\_Mustela\_putorius\_furo 380  
P18506|GABRD\_Rattus\_norvegicus 380  
P22933|GABRD\_Mus\_musculus 380  
E2R3M6|GABRD\_Canis\_lupus\_familiaris 384  
E9QHL0|GABRD\_Danio\_erio 362  
A0A3Q1LQH4|GABRD\_Bos\_taurus 383  
F1QZB5|GABRZ\_Danio\_erio 372

014764|GABRD\_Homo\_sapiens 443  
A0A2R9B726|GABRD\_Pan\_paniscus 456  
A0A2J8K8J4|GABRD\_Pan\_troglodytes 443  
F6QDC4|GABRD\_Macaca\_mulatta 421  
XP\_004768807.1|GABRD\_Mustela\_putorius\_furo 443  
P18506|GABRD\_Rattus\_norvegicus 440  
P22933|GABRD\_Mus\_musculus 440  
E2R3M6|GABRD\_Canis\_lupus\_familiaris 447  
E9QHL0|GABRD\_Danio\_erio 429  
A0A3Q1LQH4|GABRD\_Bos\_taurus 483  
F1QZB5|GABRZ\_Danio\_erio 437



```

*
O14764|GABRD_Homo_sapiens      VIYWAAAYAM----- 452
A0A2R9B726|GABRD_Pan_paniscus   VIYWAAAYAM----- 465
A0A2J8K8J4|GABRD_Pan_troglodytes    VIYWAAAYAM----- 452
F6QDC4|GABRD_Macaca_mulatta     VIYWAAAYAM----- 430
XP_004768807.1|GABRD_Mustela_putorius_furo VLYWAAAYAM----- 452
P18506|GABRD_Rattus_norvegicus  IIYWAAAYTM----- 449
P22933|GABRD_Mus_musculus        IIYWAAAYTM----- 449
E2R3M6|GABRD_Canis_lupus_familiaris VLYWAAAYAM----- 456
E9QHL0|GABRD_Danio_rerio       VIYWVAYTM----- 438
A0A3Q1LQH4|GABRD_Bos_taurus     P T S W R A T P T R P S M G K P G V V G S P R P C S G H 511
F1QZB5|GABRZ_Danio_rerio       L L Y W T Y Y L Y F ----- 447
.....510.....520.....

```

```

* .*** :* . : *      * : : . . . * * * * *      . : : * * *      : * : * . : * : * : * * * * * *
P78334|GABRE_Homo_sapiens      M L S K V L P V L L G I L L I L Q S R V E G P O T E S K N E A S S R D V - V Y G P O P O ----- P L E N Q L L S E E T K S T E T E T G S R V - G K L P E A S R I L N T I L S N Y D H K L R P G I      90
A0A2R8ZSJ9|GABRE_Pan_paniscus M L S K V L P V L L G I L L I L Q S R V E G P O T E S K N E A S S R D V - V Y G P O P O ----- P L E N Q L L S E E T K S T E T E T G R R V - G K L P E A S R I L N T I L S N Y D H K L R P G I      90
H2QZ86|GABRE_Pan_troglodytes   M L S K V L P V L L G I L L I L Q S R V E G P O T E S K N E A S S R D V - V Y G P O P O ----- P L E N Q L L S E E T K S T E T E T G R R V - G K L P E A S R I L N T I L S N Y D H K L R P G I      90
F7GJ80|GABRE_Macaca_mulatta      M L S K V L P V L L G I L L I L Q S R V E G P O T E S K N E A S A H D V - V Y G P P O ----- P L E N K L F S E E T K S T E T G R R A - G K L P E A S R I L N T I L S N Y D H K L R P G I      90
Q9ES14|GABRE_Rattus_norvegicus  M L P K V L L M L L N M F L A L Q W R V - G P H I K L E N K P P A Q D K V F G P O P O ----- P S G K L P A R E T E L I A D H T T E R P R G K L T R A S Q I L N T I L S N Y D H K L R P S I      91
Q9JLE8|GABRE_Mus_musculus        M L P K V L L M L L N M F L A L Q W R V - G P H V N L E N K P P A Q D K V F G P O P O P V P O P L T P P S G K L P A K E T E L I V D C M T E R P G G K L T R A S R I L N T I L S N Y D H K L R P G I      99
E2QVM5|GABRE_Canis_lupus_familiaris M L A K V L L I L L G S I I L P S R S E G P V N E S K A P S A R D D - V Y G P O P O ----- A P E K L L S E E T K S T M ----- R L - G N L P A A T H I L N S I L N N Y D H K L R P G I      85
M3YJW6|GABRE_Mustela_putorius_furo M L T K V L L I L L G M S I I L P S R S E E P R V E L E N G P S A H D D - V Y G H O P O ----- A P E N K L L S E E T V P I T F G P Y H R L - G N L Q A A T H I L N S I L N N Y D H K L R P G I      90
G3MWU9|GABRE_Bos_taurus          M S I K V L L I L L M G I L V I L P C - I E G P O V E S E E G S S G S D D K V Y G P K P O ----- P P E K L S S E E I K P I A V G T H K K L - G K M P T A T E I L D G I F H N Y D Y K L R P G I      90
1.....10.....20.....30.....40.....50.....60.....70.....80.....90.....100

* .*** :* . : *      * : : . . . * * * * *      . : : * * *      : * : * . : * : * : * * * * * *
P78334|GABRE_Homo_sapiens      G E K P T V V T V E I S V N S L G P L S I L D M E Y T I D I I F S Q T W Y D E R L C Y N D T F E S L V L N G N V S Q L W I P D T F F R N S K R T H E H E I T M P N Q M V R I Y K D G K V L Y T I R M T      190
A0A2R8ZSJ9|GABRE_Pan_paniscus G E K P T V V T V E I S V N S L G P L S I L D M E Y T I D I I F S Q T W Y D E R L S Y N D T F E S L V L N G N V S Q L W I P D T F F R N S K R T H E H E I T M P N Q M V R I Y K D G K V L Y T I R M T      190
H2QZ86|GABRE_Pan_troglodytes   G E K P T V V T V E I S V N S L G P L S I L D M E Y T I D I I F S Q T W Y D E R L S Y N D T F E S L V L N G N V S Q L W I P D T F F R N S K R T H E H E I T M P N Q M V R I Y K D G K V L Y T I R M T      190
F7GJ80|GABRE_Macaca_mulatta      G E K P T V V T V E I S V N S L G P L S I L D M E Y T I D I I F S Q T W Y D E R L C Y N D T F E S L V L N G N V S Q L W I P D T F F R N S K R T H E H E I T M P N Q M V R I Y K D G K V L Y T I R M T      190
Q9ES14|GABRE_Rattus_norvegicus  G E K P T V V T V K V F V N S L G P I S I L D M E Y S I D I I F Y Q T W Y D E R L R Y N D T F E T I L I L H G N V S Q L W I P D T F F R N S K R T Q E Y D I T I P N Q M A L I H K D G K V L Y T V R M T      191
Q9JLE8|GABRE_Mus_musculus        G E K P T V V T V E I V I V N S L G P I S T P D M E Y S I D I I F H Q T W Y D E R L R Y N D T F E T I L I L H G N V S Q L W I P D T F F R N S K R T Q E Y D I T I P N Q M A L I H K D G K V L Y S V R M T      199
E2QVM5|GABRE_Canis_lupus_familiaris G E R P T V V T V E L S V N T L G P I S I M D M E Y T I D I I F C Q T W Y D E R L R Y N G S F E S F V L N G M V S Q L W I P D T F F R N S K R T Q E H V I T M P N Q M V R I H K D G K V L Y T I R M T      185
M3YJW6|GABRE_Mustela_putorius_furo G E K P T V V T V E L S V N T L G P I S I L D M E Y T I D I I F C Q T W Y D E R L R Y N G S F E S F V L N G M V S Q L W I P D T F F R N S K R T Q E H V I T M P N Q M A R I H K D G K V L Y T I R M T      190
G3MWU9|GABRE_Bos_taurus          G E R P T V V T V E L S V N T L G P I S I M D M E Y T I D I I F C Q T W Y D E R L R F N G S F E S F V L S G L N V S L L W V P D T F F R N S K R T Y E H S I T M P N Q M V R I H K D G K V L Y T I R M T      190
.....110.....120.....130.....140.....150.....160.....170.....180.....190.....200

* .*** :* . : *      * : : . . . * * * * *      . : : * * *      : * : * . : * : * : * * * * * *
P78334|GABRE_Homo_sapiens      I D A G C S L H M L R F P M D S H S C P L S F S S F S Y P E N E M I Y K W E N F K L E I N E K N S W K L F Q F D F T G V S N K T E I I T P V G D F M V M T I F F N V S R R F G Y V A F Q N Y V P S S V      290
A0A2R8ZSJ9|GABRE_Pan_paniscus I D A G C S L H M L R F P M D S H S C P L S F S S F S Y P E N E M I Y K W E N F K L E I N E K N S W K L F Q F D F T G V S N K T E I I T P V G D F M V M T I F F N V S R R F G Y V A F Q N Y V P S S V      290
H2QZ86|GABRE_Pan_troglodytes   I D A G C S L H M L R F P M D S H S C P L S F S S F S Y P E N E M I Y K W E N F K L E I N E K N S W K L F Q F D F T G V S N K T E I I T P V G D F M V M T I F F N V S R R F G Y V A F Q N Y V P S S V      290
F7GJ80|GABRE_Macaca_mulatta      I D A G C S L H M L R F P M D S H S C P L S F S S F S Y P E N E M I Y K W E N F K L E I N E K N S W K L F Q F D F T G V S N K T E I I T P V G D F M V M T I F F N V S R R F G Y V A F Q N Y V P S S V      290
Q9ES14|GABRE_Rattus_norvegicus  I D A R C S L H M L N F P M D S H S C P L S F S S F S Y D E H E M I Y K W E N F K L K I D A K N T W K L L E F D F T G V N N K T E I I S T P V G D F M V M T I F F N V S R R F G F I V F Q N Y I P S S V      291
Q9JLE8|GABRE_Mus_musculus        I D A R C S L H M L N F P M D S H S C P L S F S S F S Y D D S E M I Y K W E N F K L E I N A K N T W K L L E F D F T G V N N K T E I I S T P F G D F M V M T I F F N V S R R F G F I V F Q N Y V P S S V      299
E2QVM5|GABRE_Canis_lupus_familiaris I D A G C L L Y M L K F P M D S H S C P L S F S S F S Y P E S E M I Y K W E N F K L Q I D E R N T W K L F Q F D F T G V T N T T E I I S T P A G D F T V M T L Y F N V S R R F G F V A F Q N Y V P S S V      285
M3YJW6|GABRE_Mustela_putorius_furo I D A G C L L H M L K F P M D S H S C P L S F S S F S Y P E S E M I Y K W E D F K L E I N E K N S W K L F Q F D F T G V T N T T E I I S T P A G D F M V M T L F F N V S R R F G F V A F Q N Y V P S S V      290
G3MWU9|GABRE_Bos_taurus          I E A G C S L H M L K F P M D S H S C P L S F S S F S Y P E N D L I Y K W E N F M L K I N E S N S W K L F Q F D F T G V S N T T E I T V T T L A G D F I V M T L Y F N V S R R F G F V A F H N Y V P S S V      290
.....210.....220.....230.....240.....250.....260.....270.....280.....290.....300

* .*** :* . : *      * : : . . . * * * * *      . : : * * *      : * : * . : * : * : * * * * * *
P78334|GABRE_Homo_sapiens      T T M L S W V S F W I K T E S A P A R T S L G I T S V L T M T L G T F S R K N F P R V S Y I T A L D F Y I A I C F V F C F C A L L E F A V L N F L I Y N Q T K A H A S P K L ----- R H P R I N S      384
A0A2R8ZSJ9|GABRE_Pan_paniscus T T M L S W V S F W I K T E S A P A R T S L G I T S V L T M T L G T F S R K N F P R V S Y I T A L D F Y I A I C F V F C F C A L L E F A V L N F L I Y N Q T K A H A S P K L ----- R H P R I N S      384
H2QZ86|GABRE_Pan_troglodytes   T T M L S W V S F W I K T E S A P A R T S L G I T S V L T M T L G T F S R K N F P R V S Y I T A L D F Y I A I C F V F C F C A L L E F A V L N F L I Y N Q T K A H A S P K L ----- R H P R I N S      384
F7GJ80|GABRE_Macaca_mulatta      T T M L S W V S F W I K T E S A P A R T S L G I T S V L T M T L G T F S R K N F P R V S Y I T A L D F Y I A I C F V F C F C A L L E F A V L N F L I Y N Q T K A H A S P K L ----- R H P R I D S      384
Q9ES14|GABRE_Rattus_norvegicus  T T M L S W V S F W I K I E A A A A R A S V G V S S V L T M A T L G T F S R K N F P R V S Y L T A L D F Y I A I C F V L C F C T L L E F T V L N F L T Y N N I E R Q A S P K F Y Q F P T M S R A N A R T      391
Q9JLE8|GABRE_Mus_musculus        T T M L S W V S F W I K I E A A A A R A S V G V S S V L T M A T L G T L C K N F P R V S Y L T A L D F Y I A I C F V L C F C T L L E F A V L N F L T Y N N I K R Q A S L K V Y Q L P T M S R A N A H T      399
E2QVM5|GABRE_Canis_lupus_familiaris T T M L S W V S F W I K R D S A P A R T S L G I T S V L T M T L G T F S R K N F P R V S Y I T A L D F Y I A I C F V F C F C A L M E F A V L N F L T Y N R T N P R A S P K L ----- R H P -----      375
M3YJW6|GABRE_Mustela_putorius_furo T T M L S W V S F W I K K D S A P A R T S L G I T S V L T M T L G T F S R K N F P R V S Y V T A L D F Y I A I C F V F C F C A L M E F A V L N F L T Y N W T K P R A S P R F ----- R H P -----      380
G3MWU9|GABRE_Bos_taurus          T T M V S W I S F W I K K E S A P A R T S L G I T S V L T M T L G T F S R K N F P R V S Y I T A L D F Y I A I C F V F C F C A L M E F A V L N F L T Y N R T A P R G S P I L ----- R H P -----      380
.....310.....320.....330.....340.....350.....360.....370.....380.....390.....400

* .*** :* . : *      * : : . . . * * * * *      . : : * * *      : * : * . : * : * : * * * * * *
P78334|GABRE_Homo_sapiens      R A H A R T R A R S R A C A R Q H Q E A F V C Q I V T T E ----- G S D G E E H P S C S A Q P P S P G S P E G P R S L C S K L A C C E W C K R F K K Y F C M V P D C E G S T W Q Q G R L C I H V Y R      479
A0A2R8ZSJ9|GABRE_Pan_paniscus R A H A R T R A R S R A C A R Q H Q E A F V C Q I V T T E ----- G S D G E E H P S C S A Q P P S P G S P E G P R S L C S K L A C C E W C K G F K K Y F C M V P D C E G S T W Q Q G R L C I H V Y R      479
H2QZ86|GABRE_Pan_troglodytes   R A H A R T R A R S R A C A R Q H Q E A F V C Q I V T T E ----- G S D G E E R P S C S A Q P P S P G S P E G P R S L C S K L A C C E W C K G F K K Y F C M V P D C E G S T W Q Q G R L C I H V Y R      479
F7GJ80|GABRE_Macaca_mulatta      R A H A R T R A R S R A C A R Q H Q E A F V C Q I V T T E ----- G S D G E D R P S C S A Q P P S P G S P E G P R S L C S K L A C C E W C K G F K K Y F C M V P D C E G S T W Q Q G R L C I H V Y R      479
Q9ES14|GABRE_Rattus_norvegicus  R A R A R T R A R A R A R A R Q Q E V F V C E I V T Y E ----- E N A E E G ----- Y Q W S P R S R R P C P W R R C G R S Y V C F R V -- L R K Y F C M V P G C E G S T W Q Q G R I C I H V Y R      479
Q9JLE8|GABRE_Mus_musculus        R A R A R T R A R A R A R A R Q Q E V F V C E I V T Y E ----- E N A E E G ----- Y Q W S P R S R R P C P W R R C G R S Y V C F R V -- L R K Y F C M A P G C E G S W R G R I C I H V Y R      487
E2QVM5|GABRE_Canis_lupus_familiaris Q I R A R S R T P P R A H V H Q H P E A F V C Q I E D S E ----- E S D E E G P S C P A Q Q S L S L D T T O R P G - G C ----- C K W C --- K K Y F C M V P S C E G S I W Q G R L F I H I Y R      461
M3YJW6|GABRE_Mustela_putorius_furo H I R A R A L T P P R A H V H Q H P E A F V C Q I E D S E ----- E S D G E E G P F C P A Q Q S F R R R T I Q A G N G C ----- C K W C --- K K Y F C V V P S C E G S I W Q Q G R L F I H I Y R      467
G3MWU9|GABRE_Bos_taurus          R A T I R V R I P ----- V V E H P E A F V C I E D S E E E E L G E S E E D E G P S C P A R Q A T R P S R L O R S A - G C ----- S R W C --- D K Y C C M V P T C D A S S W Q Q G R L F I H V Y R      467
.....410.....420.....430.....440.....450.....460.....470.....480.....490.....500

```

```

*****:***:*****:***:****
P78334|GABRE_Homo_sapiens      LDNYSRVVFPVTFFFFNVLVWLVCLNL 506
A0A2R8ZSJ9|GABRE_Pan_paniscus  LDNYSRVVFPVTFFFFNVLVWLVCLNL 506
H2QZ86|GABRE_Pan_troglodytes   LDNYSRVVFPVTFFFFNVLVWLVCLNL 506
F7GJ80|GABRE_Macaca_mulatta      LDNYSRVVFPVTFFFFNVLVWLVCLNL 506
Q9ES14|GABRE_Rattus_norvegicus  LDNYSRVLFPIIFFFFNVVVWVICLNL 506
Q9JLE8|GABRE_Mus_musculus       LDNYSRVLFPIIFFFFNVLVWLVCLNL 514
E2QVM5|GABRE_Canis_lupus_familiaris LDNYSRVIFPVTFFFFNVLVWLVCLNL 488
M3YJW6|GABRE_Mustela_putorius_furo LDNYSRVVFPVTFFFFNVLVWLVCLNL 494
G3MWU9|GABRE_Bos_taurus        LDNYSRVIFPVTFFFFNVLVWLVCLNL 494
.....510.....520.....

```

Q8N1C3|GABRG1\_Homo\_sapiens ---MGPLKAFLEFPFLLRSSQSRGVRLVFLLLT--LHLGNCVDKADDEDEDLTVNKTWVWLAPKIHGEGDITQILNSLLOGYDNKLRPDIGVRPTVIETDVY 95
A0A2R9A1L5|GABRG1\_Pan\_paniscus ---MGPLKAFLEFPFLLRSSQSRGVRLVFLLLT--LHLGNCVDKADDEDEDLTVNKTWVWLAPKIHGEGDITQILNSLLOGYDNKLRPDIGVRPTVIETDVY 95
H2QPE4|GABRG1\_Pan\_troglodytes ---MGPLKAFLEFPFLLRSSQSRGVRLVFLLLT--LHLGNCVDKADDEDEDLTVNKTWVWLAPKIHGEGDITQILNSLLOGYDNKLRPDIGVRPTVIETDVY 95
A0A5F8A0N7|GABRG1\_Macaca\_mulatta ---MGPLKAFLEFPFLLRSSQSRGVRLVFLLLT--LHLGNCVDKADDEDEDLTVNKTWVWLAPKIHGEGDITQILNSLLOGYDNKLRPDIGVRPTVIETDVY 95
M3Y0V1|GABRG1\_Mustela\_putorius\_furo ---MGSWKAFLEFPFLLRSSQSRVRLMFLLLT--LHLGNCVDKVDEDEDLTVNKTWVWLAPRIHGEDITQILNSLLOGYDNKLRPDIGVRPTVIETDVY 95
P23574|GABRG1\_Rattus\_norvegicus ---MGSQKAFLEFPFLLRSSQSRVRLVFLLLT--LHLGNCIDKADDEDEDLTMNKTWVWLAPKIHGEGDITQILNSLLOGYDNKLRPDIGVRPTVIETDVY 95
Q9R0Y8|GABRG1\_Mus\_musculus ---MGSQKAFLEFPFLLRSSQSRVRLVFLLLT--LHLGNCVDKADDEDEDLTMNKTWVWLAPKIHGEGDITQILNSLLOGYDNKLRPDIGVRPTVIETDVY 95
E2RH22|GABRG1\_Canis\_lupus\_familiaris MPPMGPWKAPLCSFPFLLRSSQSRVRLVFLLLT--LHLGNCVDKVDEDEDLTVNKTWVWLAPKIHGEGDITQILNSLLOGYDNKLRPDIGVRPTVIETDVY 98
A0A0R4IPF9|GABRG1\_Danio\_rerio YMLNSPLQE---AP---SHAYGYFVLP LLNNOIMAFGPS--KAEEEDYEDVPINKTWVLSPKVYSDVTLILNKLLOGYDNKLRPDIGVRPTVIETAVY 91
F6Q4V7|GABRG1\_Bos\_taurus ---MGSWKALFLEFPFLLRSSQSRVRLMFLLLT--VHLGNCVDKADDEDEDLTVNKTWVWLAPKIHGEGDITQILNSLLOGYDNKLRPDIGVRPTVIETDVY 95
1.....10.....20.....30.....40.....50.....60.....70.....80.....90.....100

Q8N1C3|GABRG1\_Homo\_sapiens VNSIGPVDPINMEYTIIDIIFAQTWFD SRLKFNSTMKVLMNLSNMVGIWIPDITFFRNSRKS DAHWITTPNRLRLRIWNGRVLVYTLRLTINAECYLQLHNF 195
A0A2R9A1L5|GABRG1\_Pan\_paniscus VNSIGPVDPINMEYTIIDIIFAQTWFD SRLKFNSTMKVLMNLSNMVGIWIPDITFFRNSRKS DAHWITTPNRLRLRIWNGRVLVYTLRLTINAECYLQLHNF 195
H2QPE4|GABRG1\_Pan\_troglodytes VNSIGPVDPINMEYTIIDIIFAQTWFD SRLKFNSTMKVLMNLSNMVGIWIPDITFFRNSRKS DAHWITTPNRLRLRIWNGRVLVYTLRLTINAECYLQLHNF 195
A0A5F8A0N7|GABRG1\_Macaca\_mulatta VNSIGPVDPINMEYTIIDIIFAQTWFD SRLKFNSTMKVLMNLSNMVGIWIPDITFFRNSRKS DAHWITTPNRLRLRIWNGRVLVYTLRLTINAECYLQLHNF 195
M3Y0V1|GABRG1\_Mustela\_putorius\_furo VNSIGPVDPINMEYTIIDIIFAQTWFD SRLKFNSTMKVLMNLSNMVGIWIPDITFFRNSRKS DAHWITTPNRLRLRIWNGRVLVYTLRLTINAECYLQLHNF 195
P23574|GABRG1\_Rattus\_norvegicus VNSIGPVDPINMEYTIIDIIFAQTWFD SRLKFNSTMKVLMNLSNMVGIWIPDITFFRNSRKS DAHWITTPNRLRLRIWSDGRVLVYTLRLTINAECYLQLHNF 195
Q9R0Y8|GABRG1\_Mus\_musculus VNSIGPVDPINMEYTIIDIIFAQTWFD SRLKFNSTMKVLMNLSNMVGIWIPDITFFRNSRKS DAHWITTPNRLRLRIWSDGRVLVYTLRLTINAECYLQLHNF 195
E2RH22|GABRG1\_Canis\_lupus\_familiaris VNSIGPVDPINMEYTIIDIIFAQTWFD SRLKFNSTMKVLMNLSNMVGIWIPDITFFRNSRKS DAHWITTPNRLRLRIWNGRVLVYTLRLTINAECYLQLHNF 198
A0A0R4IPF9|GABRG1\_Danio\_rerio VNSIGPVDPINMEYTIIDIIFAQTWYD SRLKFNSSMKLLMNSNMVGIWIPDITFFRNSRKS DAHWITTPNRLRLRWSNGRVMYTLRLTINAECYLKLHNF 191
F6Q4V7|GABRG1\_Bos\_taurus VNSIGPVDPINMEYTIIDIIFAQTWFD SRLKFNSTMKVLMNLSNMVGIWIPDITFFRNSRKS DAHWITTPNRLRLRIWNGRVLVYTLRLTINAECYLQLHNF 195
.....110.....120.....130.....140.....150.....160.....170.....180.....190.....200

Q8N1C3|GABRG1\_Homo\_sapiens PMDEHSCPLEFSSYGYPKNEIEYKWKPPSVEVADPKYWRLYQFAFVGLRNSTEIHTISGDYVIMTIFFDLRRMGYFTIQTYIPCILTVVLSWVSWFWIN 295
A0A2R9A1L5|GABRG1\_Pan\_paniscus PMDEHSCPLEFSSYGYPKNEIEYKWKPPSVEVADPKYWRLYQFAFVGLRNSTEIHTISGDYVIMTIFFDLRRMGYFTIQTYIPCILTVVLSWVSWFWIN 295
H2QPE4|GABRG1\_Pan\_troglodytes PMDEHSCPLEFSSYGYPKNEIEYKWKPPSVEVADPKYWRLYQFAFVGLRNSTEIHTISGDYVIMTIFFDLRRMGYFTIQTYIPCILTVVLSWVSWFWIN 295
A0A5F8A0N7|GABRG1\_Macaca\_mulatta PMDEHSCPLEFSSYGYPKNEIEYKWKPPSVEVADPKYWRLYQFAFVGLRNSTEIHTISGDYVIMTIFFDLRRMGYFTIQTYIPCILTVVLSWVSWFWIN 295
M3Y0V1|GABRG1\_Mustela\_putorius\_furo PMDEHSCPLEFSSYGYPKNEIEYKWKPPSVEVADPKYWRLYQFAFVGLRNSTEIHTISGDYVIMTIFFDLRRMGYFTIQTYIPCILTVVLSWVSWFWIN 295
P23574|GABRG1\_Rattus\_norvegicus PMDEHSCPLEFSSYGYPKNEIEYKWKPPSVEVADPKYWRLYQFAFVGLRNSTEIHTISGDYVIMTIFFDLRRMGYFTIQTYIPCILTVVLSWVSWFWIN 295
Q9R0Y8|GABRG1\_Mus\_musculus PMDEHSCPLEFSSYGYPKNEIEYKWKPPSVEVADPKYWRLYQFAFVGLRNSTEIHTISGDYVIMTIFFDLRRMGYFTIQTYIPCILTVVLSWVSWFWIN 295
E2RH22|GABRG1\_Canis\_lupus\_familiaris PMDEHSCPLEFSSYGYPKNEIEYKWKPPSVEVADPKYWRLYQFAFVGLRNSTEIHTISGDYVIMTIFFDLRRMGYFTIQTYIPCILTVVLSWVSWFWIN 298
A0A0R4IPF9|GABRG1\_Danio\_rerio PMDEHSCPLEFSSYGYPKNEIQYRWQRSSVEVADQRYWRLYQFAFVGLRNSSDVANTQSGEYVIMTIFFDLRRMGYFTIQTYIPCSMIVVLSWVSWFWIN 291
F6Q4V7|GABRG1\_Bos\_taurus PMDEHSCPLEFSSYGYPKNEIEYKWKPPSVEVADPKYWRLYQFAFVGLRNSTEIHTISGDYVIMTIFFDLRRMGYFTIQTYIPCILTVVLSWVSWFWIN 295
.....210.....220.....230.....240.....250.....260.....270.....280.....290.....300

Q8N1C3|GABRG1\_Homo\_sapiens KDAVPARTSLGITTVLTMFTLSTIARKSLPKVSYVTAMDLFVSVCFIFVFAALMEYGLHYFTSNQKGGTATKDRKLNKASMT PGLHPGSTLIPMNNIS 395
A0A2R9A1L5|GABRG1\_Pan\_paniscus KDAVPARTSLGITTVLTMFTLSTIARKSLPKVSYVTAMDLFVSVCFIFVFAALMEYGLHYFTSNQKGGTATKDRKLNKASMT PGLHPGSTLIPMNNIS 395
H2QPE4|GABRG1\_Pan\_troglodytes KDAVPARTSLGITTVLTMFTLSTIARKSLPKVSYVTAMDLFVSVCFIFVFAALMEYGLHYFTSNQKGGTATKDRKLNKASMT PGLHPGSTLIPMNNIS 395
A0A5F8A0N7|GABRG1\_Macaca\_mulatta KDAVPARTSLGITTVLTMFTLSTIARKSLPKVSYVTAMDLFVSVCFIFVFAALMEYGLHYFTSNKKGKTATKDRKLNKASMT PGLHPGSTLIPMNSVS 395
M3Y0V1|GABRG1\_Mustela\_putorius\_furo KDAVPARTSLGITTVLTMFTLSTIARKSLPKVSYVTAMDLFVSVCFIFVFAALMEYGLHYFTSNKKGKTATKDRKLNKASMT PGLHPGSTLIPMNNIS 394
P23574|GABRG1\_Rattus\_norvegicus KDAVPARTSLGITTVLTMFTLSTIARKSLPKVSYVTAMDLFVSVCFIFVFAALMEYGLHYFTSNKKGKTATKDRKLNKASMT PGLHPGSTLIPMNNIS 394
Q9R0Y8|GABRG1\_Mus\_musculus KDAVPARTSLGITTVLTMFTLSTIARKSLPKVSYVTAMDLFVSVCFIFVFAALMEYGLHYFTSNKKGKTATKDRKLNKASMT PGLHPGSTLIPMNNIS 394
E2RH22|GABRG1\_Canis\_lupus\_familiaris KDAVPARTSLGITTVLTMFTLSTIARKSLPKVSYVTAMDLFVSVCFIFVFAALMEYGLHYFTSNKKGKTATKDRKLNKASMT PGLHPGSTLIPMNSIS 397
A0A0R4IPF9|GABRG1\_Danio\_rerio KDAVPARTSLGITTVLTMFTLSTISRKSLPKVSYVTAMDLFVSVCFIFVFAALMEYGLHYFTSNRQNKKTATKSSHAQKPSMVN--IRPGTSLQMNIA 388
F6Q4V7|GABRG1\_Bos\_taurus KDAVPARTSLGITTVLTMFTLSTIARKSLPKVSYVTAMDLFVSVCFIFVFAALMEYGLHYFTSNKKGKTATREKPKPKLKTSMSSGLHPGSTLIPMNSLS 394
.....310.....320.....330.....340.....350.....360.....370.....380.....390.....400

Q8N1C3|GABRG1\_Homo\_sapiens VPG-EDDYGYQCLEGKDCASFFCCFEDCRTGSWREGRIHIRIAKIDYSRIFP---PTAFALFNLVYVWGYLYL----- 465
A0A2R9A1L5|GABRG1\_Pan\_paniscus VPG-EDDYGYQCLEGKDCASFFCCFEDCRTGSWREGRIHIRIAKIDYSRIFP---PTAFALFNLVYVWGYLYL----- 465
H2QPE4|GABRG1\_Pan\_troglodytes VPG-EDDYGYQCLEGKDCASFFCCFEDCRTGSWREGRIHIRIAKIDYSRIFP---PTAFALFNLVYVWGYLYL----- 465
A0A5F8A0N7|GABRG1\_Macaca\_mulatta VPG-EDDYGYQCLEGKDCASFFCCFEDCRTGSWREGRIHIRIAKIDYSRIFP---PTAFALFNLVYVWGYLYL----- 478
M3Y0V1|GABRG1\_Mustela\_putorius\_furo LPHGEDDYGYQCLEGKDCASFFCCFEDCRTGSWREGRIHIRIAKIDYSRIFP---PTAFALFNLVYVWGYLYL----- 465
P23574|GABRG1\_Rattus\_norvegicus MPQGEDDYGYQCLEGKDCASFFCCFEDCRTGSWREGRIHIRIAKIDYSRIFP---PTAFALFNLVYVWGYLYL----- 465
Q9R0Y8|GABRG1\_Mus\_musculus LPHGEDDYGYQCLEGKDCASFFCCFEDCRTGSWREGRIHIRIAKIDYSRIFP---PTAFALFNLVYVWGYLYL----- 465
E2RH22|GABRG1\_Canis\_lupus\_familiaris LPHGEDDYGYQCLEGKDCASFFCCFEDCRTGSWREGRIHIRIAKIDYSRIFP---PTAFALFNLVYVWGYLYL----- 468
A0A0R4IPF9|GABRG1\_Danio\_rerio PVHEDDDYAYECLDGKDCASFFCCFEDCRTGSWREGRIHIRIAKIDYSRIFP---PTAFGLFNLVYVWGYLYL----- 459
F6Q4V7|GABRG1\_Bos\_taurus LPHGEDDYGYQCLEGKDCASFFCCFEDCRTGSWREGRIHIRIAKIDYSRIFP---PTAFALFNLVYVWGYLYL----- 465
.....410.....420.....430.....440.....450.....460.....470.....480.....



Q99928|GABRG3\_Homo\_sapiens MAPKLLLLLLCLFSLGHARSRKV--EED EYEDSSSNQKWWLAPKSDTDVTLILNKLREYDKKLRPDIGIKPTVIDVDIYVNSIGPVSSINMEYQIDIFF 98  
A0A2R9BD98|GABRG3\_Pan\_paniscus -----SRKV--EED EYEDSSSNQKWWLAPKSDTDVTLILNKLREYDKKLRPDIGIKPTVIDVDIYVNSIGPVSSINMEYQIDIFF 80  
A0A2I3TTK9|GABRG3\_Pan\_troglodytes MAPKLLLLLLCLFSLGHARSRKV--EED EYEDSSSNQKWWLAPKSDTDVTLILNKLREYDKKLRPDIGIKPTVIDVDIYVNSIGPVSSINMEYQIDIFF 98  
F7HI54|GABRG3\_Macaca\_mulatta MAPKLLLLLLCLFSLGHARSRKV--EED EYEDSSSNQKWWLAPKSDTDVTLILNKLREYDKKLRPDIGIKPTVIDVDIYVNSIGPVSSINMEYQIDIFF 98  
P28473|GABRG3\_Rattus\_norvegicus MAAKLLLLLLCLFSLGHARSRRV--EED DSEDSPSNQKWWLAPKSDTDVTLILNKLREYDKKLRPDIGIKPTVIDVDIYVNSIGPVSSINMEYQIDIFF 98  
P27681|GABRG3\_Mus\_musculus MAAKLLLLLLCLFSLGHARSRRV--EED ENEDSPSNQKWWLAPKSDTDVTLILNKLREYDKKLRPDIGIKPTVIDVDIYVNSIGPVSSINMEYQIDIFF 98  
F1PHI6|GABRG3\_Canis\_lupus\_familiaris MAPELLLLLLCLSGVGHARSRKV--EED EYEDSSSNQKWWLAPKSDTDVTLILNKLREYDKKLRPDIGIKPTVIDVDIYVNSIGPVSSINMEYQIDIFF 98  
XP\_009300843.1|GABRG3\_Danio\_rerio MTKKFLFYFLLLVYFRACSTFASDDDEYDDVIVNQ--MLAPKTHETDAQILNKLREYDKKLRPDIGVKTVIDVDIYVNSIGPVSSINMEYQIDIFF 98  
XP\_024838027.1|GABRG3\_Bos\_taurus MAPKLLLLLLCLLGLHARTRKV--EED EYEDSSSNQKWWLAPKSDTDVTLILNKLREYDKKLRPDIGIKPTVIDVDIYVNSIGPVSSINMEYQIDIFF 98  
XP\_044926358.1|GABRG3\_Mustela\_putorius\_furo -----MVKLKLQAHNE----- 12  
1.....10.....20.....30.....40.....50.....60.....70.....80.....90.....100

Q99928|GABRG3\_Homo\_sapiens AQTWTD SRLRFNSTMKILTLNSNMVGLIWIPTIFRNSKTAEAHWITTPNQLLRWINDGKILYTLRRLTINAECQLQHNFPDDEHSCPLIFSSYGPKEE 198  
A0A2R9BD98|GABRG3\_Pan\_paniscus AQTWTD SRLRFNSTMKILTLNSNMVGLIWIPTIFRNSKTAEAHWITTPNQLLRWINDGKILYTLRRLTINAECQLQHNFPDDEHSCPLIFSSYGPKEE 180  
A0A2I3TTK9|GABRG3\_Pan\_troglodytes AQTWTD SRLRFNSTMKILTLNSNMVGLIWIPTIFRNSKTAEAHWITTPNQLLRWINDGKILYTLRRLTINAECQLQHNFPDDEHSCPLIFSSYGPKEE 198  
F7HI54|GABRG3\_Macaca\_mulatta AQTWTD SRLRFNSTMKILTLNSNMVGLIWIPTIFRNSKTAEAHWITTPNQLLRWINDGKILYTLRRLTINAECQLQHNFPDDEHSCPLIFSSYGPKEE 198  
P28473|GABRG3\_Rattus\_norvegicus AQTWTD SRLRFNSTMKILTLNSNMVGLIWIPTIFRNSKTAEAHWITTPNQLLRWINDGKILYTLRRLTINAECQLQHNFPDDEHSCPLIFSSYGPKEE 198  
P27681|GABRG3\_Mus\_musculus AQTWTD SRLRFNSTMKILTLNSNMVGLIWIPTIFRNSKTAEAHWITTPNQLLRWINDGKILYTLRRLTINAECQLQHNFPDDEHSCPLIFSSYGPKEE 198  
F1PHI6|GABRG3\_Canis\_lupus\_familiaris AQTWTD SRLRFNSTMKILTLNSNMVGLIWIPTIFRNSKTAEAHWITTPNQLLRWINDGKILYTLRRLTINAECQLQHNFPDDEHSCPLIFSSYGPKEE 198  
XP\_009300843.1|GABRG3\_Danio\_rerio AQTWTD SRLRFNSTMKILTLNSNMVGLIWIPTIFRNSKTSADSHWITTPNQLLRWINDGKILYTLRRLTINAECQLQHNFPDDEHSCPLIFSSYGPKEE 198  
XP\_024838027.1|GABRG3\_Bos\_taurus AQTWTD SRLRFNSTMKILTLNSNMVGLIWIPTIFRNSKTAEAHWITTPNQLLRWINDGKILYTLRRLTINAECQLQHNFPDDEHSCPLIFSSYGPKEE 198  
XP\_044926358.1|GABRG3\_Mustela\_putorius\_furo -----WRDG----- 21  
.....110.....120.....130.....140.....150.....160.....170.....180.....190.....200

Q99928|GABRG3\_Homo\_sapiens MIYRWRKNSVEAADQKSWRLYQDFDMGLRNTTEIVTTSAGDYVVMITVFELSRRMGYFTIQT YIP CILTVVLSWVSFWIKKDATPARTAL----- 288  
A0A2R9BD98|GABRG3\_Pan\_paniscus MIYRWRKNSVEAADQKSWRLYQDFDMGLRNTTEIVTTSAGDYVVMITVFELSRRMGYFTIQT YIP CILTVVLSWVSFWIKKDATPARTAL----- 280  
A0A2I3TTK9|GABRG3\_Pan\_troglodytes MIYRWRKNSVEAADQKSWRLYQDFDMGLRNTTEIVTTSAGDYVVMITVFELSRRMGYFTIQT YIP CILTVVLSWVSFWIKKDATPARTAL----- 278  
F7HI54|GABRG3\_Macaca\_mulatta MIYRWRKNSVEAADQKSWRLYQDFDMGLRNTTEIVTTSAGDYVVMITVFELSRRMGYFTIQT YIP CILTVVLSWVSFWIKKDATPARTAL----- 288  
P28473|GABRG3\_Rattus\_norvegicus MIYRWRKNSVEAADQKSWRLYQDFDMGLRNTTEIVTTSAGDYVVMITVFELSRRMGYFTIQT YIP CILTVVLSWVSFWIKKDATPARTAL----- 288  
P27681|GABRG3\_Mus\_musculus MIYRWRKNSVEAADQKSWRLYQDFDMGLRNTTEIVTTSAGDYVVMITVFELSRRMGYFTIQT YIP CILTVVLSWVSFWIKKDATPARTAL----- 288  
F1PHI6|GABRG3\_Canis\_lupus\_familiaris MIYRWRKNSVEAADQKSWRLYQDFDMGLRNTTEIVTTSAGDYVVMITVFELSRRMGYFTIQT YIP CILTVVLSWVSFWIKKDATPARTAL----- 288  
XP\_009300843.1|GABRG3\_Danio\_rerio MIYKWRKNSVQAADQKSWRLYQDFDMGLRNTTEIVTTSAGDYVVMITVFELSRRMGYFTIQT YIP CILTVVLSWVSFWIKKDATPARTALVSCFKSMSCF 298  
XP\_024838027.1|GABRG3\_Bos\_taurus MIYRWRKNSVEAADQKSWRLYQDFDMGLRNTTEIVTTSAGDYVVMITVFELSRRMGYFTIQT YIP CILTVVLSWVSFWIKKDATPARTAL----- 288  
XP\_044926358.1|GABRG3\_Mustela\_putorius\_furo MIYRWRKNSVEAADQKSWRLYQDFDMGLRNTTEIVTTSAGDYVVMITVFELSRRMGYFTIQT YIP CILTVVLSWVSFWIKKDATPARTAL----- 111  
.....210.....220.....230.....240.....250.....260.....270.....280.....290.....300

Q99928|GABRG3\_Homo\_sapiens -----GITT VLTMTTSLTIARNSLPRVSYVTAMD L FVTVCFLFVFAALMEYATLNYYSS--CRKPTT T KKT T SLLH P D S S R W I P E R I S L Q A P S N Y S L L D 380  
A0A2R9BD98|GABRG3\_Pan\_paniscus -----GITT VLTMTTSLTIARNSLPRVSYVTAMD L FVTVCFLFVFAALMEYATLNYYSS--CRKPTT T KKT T SLLH P D S S R W I P E R I S L Q A P S N Y S L L D 362  
A0A2I3TTK9|GABRG3\_Pan\_troglodytes -----GITT VLTMTTSLTIARNSLPRVSYVTAMD L FVTVCFLFVFAALMEYATLNYYSS--CRKPTT T KKT T SLLH P D S S R W I P E R I S L Q A P S N Y S L L D 380  
F7HI54|GABRG3\_Macaca\_mulatta -----GITT VLTMTTSLTIARNSLPRVSYVTAMD L FVTVCFLFVFAALMEYATLNYYSS--CRKPTT T KKT T SLLH S D S S R W I P E R I S L Q A P S N Y S L L D 380  
P28473|GABRG3\_Rattus\_norvegicus -----GITT VLTMTTSLTIARNSLPRVSYVTAMD L FVTVCFLFVFAALMEYATLNYYSS--CRKPTI R K K T T S L L H P D S T R W I P D R I S L Q A P S N Y S L L D 380  
P27681|GABRG3\_Mus\_musculus -----GITT VLTMTTSLTIARNSLPRVSYVTAMD L FVTVCFLFVFAALMEYATLNYYSS--CRKPTI R K K K T S L L H P D S T R W I P D R I S L Q A P S N Y S L L D 380  
F1PHI6|GABRG3\_Canis\_lupus\_familiaris -----GITT VLTMTTSLTIARNSLPRVSYVTAMD L FVTVCFLFVFAALMEYATLNYYSS--CRKPTT T K K K T S L L H P D S S R W I H E R I S L Q A P S N Y S L L D 380  
XP\_009300843.1|GABRG3\_Danio\_rerio GKCHCCG GITT VLTMTTSLTIARNSLPRVSYVTAMD L FVTVCFLFVFAALMEYATLNYYSS--ARRPT CNKTKR-----SNYSVLD 378  
XP\_024838027.1|GABRG3\_Bos\_taurus -----GITT VLTMTTSLTIARNSLPRVSYVTAMD L FVTVCFLFVFAALMEYATLNYYSS--CRKPTT T K K K T S L L H A D S S R W I H E R I S L Q A P S N Y S L L D 380  
XP\_044926358.1|GABRG3\_Mustela\_putorius\_furo -----GITT VLTMTTSLTIARNSLPRVSYVTAMD L FVTVCFLFVFAALMEYATLNYYSS--CRKPTT T K K K T S L L H P D S S R W I H E R I S L Q A P S N Y S L L D 203  
.....310.....320.....330.....340.....350.....360.....370.....380.....390.....400

Q99928|GABRG3\_Homo\_sapiens MRPPPTAMITLNNSVYVQEFEDTCVYECLDGKDCQSFFCCYECKSGSWRKGRIHIDILELDSYSRVFFPTSFLLFNLVYVWGYLYL 467  
A0A2R9BD98|GABRG3\_Pan\_paniscus MRPPPPAMITLNNSVYVQEFEDTCVYECLDGKDCQSFFCCYECKSGSWRKGRIHIDILELDSYSRVFFPTSFLLFNLVYVWGYLYL 449  
A0A2I3TTK9|GABRG3\_Pan\_troglodytes MRPPPPAMITLNNSVYVQEFEDTCVYECLDGKDCQSFFCCYECKSGSWRKGRIHIDILELDSYSRVFFPTSFLLFNLVYVWGYLYL 467  
F7HI54|GABRG3\_Macaca\_mulatta MRPPPPAMITLNNSVYVQEFEDTCVYECLDGKDCQSFFCCYECKSGSWRKGRIHIDILELDSYSRVFFPTSFLLFNLVYVWGYLYL 467  
P28473|GABRG3\_Rattus\_norvegicus MRPPPPVMITLNNSMYVQEFEDTCVYECLDGKDCQSFFCCYECKSGSWRRGRIHIDVSELDYSYRVFFPTSFLLFNLVYVWGYLYL 467  
P27681|GABRG3\_Mus\_musculus MRPPPPVMITLNNSMYVQEFEDTCVYECLDGKDCQSFFCCYECKSGSWRRGRIHIDVSELDYSYRVFFPTSFLLFNLVYVWGYLYL 467  
F1PHI6|GABRG3\_Canis\_lupus\_familiaris MRPPPPAMITLNNSVYVQEFEDTCVYECLDGKDCQSFFCCYECKSGSWRKGRIHIDILELDSYSRVFFPTSFLLFNLVYVWGYLYL 467  
XP\_009300843.1|GABRG3\_Danio\_rerio VGPPPT-VITLNNSMYVQEFDDACVYECLDGKDCQSFFCCYECKDGAWRKRGRVHIDILELDAYSRVFFPTSFLLFNLVYVWGYLYL 464  
XP\_024838027.1|GABRG3\_Bos\_taurus MRPPPPVMITLNNSVYVQEFEDTCVYECLDGKDCQSFFCCYECKSGSWRKGRIHIDILELDSYSRVFFPTSFLLFNLVYVWGYLYL 467  
XP\_044926358.1|GABRG3\_Mustela\_putorius\_furo MRPPPPAMITLNNSVYVQEFEDTCVYECLDGKDCQSFFCCYECKSGSWRKGRIHIDILELDSYSRVFFPTSFLLFNLVYVWGYLYL 290  
.....410.....420.....430.....440.....450.....460.....470.....480.....

000591|GABRP\_Homo\_sapiens -----MNYSLHLAFV---CLSLFTERMCIQGSQFNVEVGRSDKLSLPGFENLTAGYNKFLRPNFGG 58  
A0A2R8ZJ77|GABRP\_Pan\_paniscus -----MNYSLHLAFV---CLSLFTERMCIQGNQFNVEVGRSDKLSLPGFENLTAGYNKFLRPNFGG 58  
A0A2J8LXV6|GABRP\_Pan\_troglodytes -----MNYSLHLAFV---CLSLFTERMCIQGNQFNVEVGRSDKLSLPGFENLTAGYNKFLRPNFGG 58  
A0A1D5QJZ6|GABRP\_Macaca\_mulatta -----MNYSLHLAFV---CLSLFTERMCIQGNQFNVEVGRSDKLSLPGFENLTAGYNKFLRPNFGG 58  
O09028|GABRP\_Rattus\_norvegicus -----MSYSLYLAFV---CLNLLAQRMCIQGNQFNVEVGRSDKLSLPGFENLTAGYNKFLRPNFGG 58  
Q8QZW7|GABRP\_Mus\_musculus -----MSYSLYLAFV---CLNLLAQRMCIQGNQFNVEVGRSDKLSLPGFENLTAGYNKFLRPNFGG 58  
E2RS87|GABRP\_Canis\_lupus\_familiaris MKLTIQNRLGRSHRRPWARGEROSIGDSYFGLSLRECLINMKYSLYLTFM---CLSLFTRPRICVQGNQFNIEVSRSDKLSLPGFENLTAGYNKFLRPNFGG 97  
XP\_021330000.1|GABRP\_Danio\_riero -----MICISDLHSYQSSGLHYHRMLLNLLFWTSLFLLLIINGERGFYGNQYG---EWNDSQLQPTTIQKLMKGYNRYLRPNFNE 75  
Q5EA06|GABRP\_Bos\_taurus -----MKRSLHLTFV---CLSLFGARMCVQGNQFNIEVSRSDKLSLPGFENLTAGYNKFLRPNFGG 58  
M3YN80|GABRP\_Mustela\_putorius\_furo -----MKYSLPLTFV---CLSLFTRPRICVQGNQFNIEVSRSDKLSLPGFENLTAGYNKFLRPNFGG 58  
1.....10.....20.....30.....40.....50.....60.....70.....80.....90.....100

000591|GABRP\_Homo\_sapiens EPVQIALTLDIASISSISESNMDYTATIYLRQRWMDQRLVFEFGNKSFTLDARLVEFLWVDPDYIIVESKKSFLHEVTVGNRLIRLFSNGTIVLYALRITTTV 158  
A0A2R8ZJ77|GABRP\_Pan\_paniscus EPVQIALTLDIASISSISESNMDYTATIYLRQRWMDQRLVFEFGNKSFTLDARLVEFLWVDPDYIIVESKKSFLHEVTVGNRLIRLFSNGTIVLYALRITTTV 158  
A0A2J8LXV6|GABRP\_Pan\_troglodytes EPVQIALTLDIASISSISESNMDYTATIYLRQRWMDQRLVFEFGNKSFTLDARLVEFLWVDPDYIIVESKKSFLHEVTVGNRLIRLFSNGTIVLYALRITTTV 158  
A0A1D5QJZ6|GABRP\_Macaca\_mulatta EPVQIALTLDIASISSISESNMDYTATIYLRQRWMDQRLVFEFGNKSFTLDARLVEFLWVDPDYIIVESKKSFLHEVTVGNRLIRLFSNGTIVLYALRITTTV 158  
O09028|GABRP\_Rattus\_norvegicus DPVRIALTLDIASISSISESNMDYTATIYLRQRWTDPRLVFEFGNKSFTLDARLVEFLWVDPDYIIVESKKSFLHEVTVGNRLIRLFSNGTIVLYALRITTTV 158  
Q8QZW7|GABRP\_Mus\_musculus DPVRIALTLDIASISSISESNMDYTATIYLRQRWTDPRLVFEFGNKSFTLDARLVEFLWVDPDYIIVESKKSFLHEVTVGNRLIRLFSNGTIVLYALRITTTV 158  
E2RS87|GABRP\_Canis\_lupus\_familiaris EPVQIALTMDIASISSISESNMDYTATIYLRQRWTDQRLVFEFGNKSFTLDARLVEFLWVDPDYIIVESKKSFLHEVTVGNRLIRLFSNGTIVLYALRITTTV 197  
XP\_021330000.1|GABRP\_Danio\_riero GPVEIGMSLDIASIDAISEINMDYTATIFLRQRWRDRLIFPGNESLIDGRLVSLWIPDFTFIPDSKRSFLHDVTIVGNRLIRLFSNGTIVLYALRITATI 175  
Q5EA06|GABRP\_Bos\_taurus EPVQIALTLDIASISSISESNMDYTATIYLRQRWTDQRLVFEFGNKSFTLDARLVEFLWVDPDYIIVESKKSFLHEVTVGNRLIRLFSNGTIVLYALRITTTV 158  
M3YN80|GABRP\_Mustela\_putorius\_furo EPVQIALTLDIASISSISESNMDYTATIYLRQRWTDQRLVFEFGNKSFTLDARLVEFLWVDPDYIIVESKKSFLHEVTVGNRLIRLFSNGTIVLYALRITTTV 158  
.....110.....120.....130.....140.....150.....160.....170.....180.....190.....200

000591|GABRP\_Homo\_sapiens ACNMDLSKYPMDTQTKLQLESWGVDGNDVEFTWLRGNSVVRGLEHLRLAQYTIERYFTLVTRSQQETGNYTRLVLOFELRRNVLYFILETYVPSSTFLV 258  
A0A2R8ZJ77|GABRP\_Pan\_paniscus ACNMDLSKYPMDTQTKLQLESWGVDGNDVEFTWLRGNSVVRGLEHLRLAQYTIERYFTLVTRSQQETGNYTRLVLOFELRRNVLYFILETYVPSSTFLV 258  
A0A2J8LXV6|GABRP\_Pan\_troglodytes ACNMDLSKYPMDTQTKLQLESWGVDGNDVEFTWLRGNSVVRGLEHLRLAQYTIERYFTLVTRSQQETGNYTRLVLOFELRRNVLYFILETYVPSSTFLV 258  
A0A1D5QJZ6|GABRP\_Macaca\_mulatta ACNMDLSKYPMDTQTKLQLESWGVDGNDVEFTWLRGNSVVRGLEHLRLAQYTIERYFTLVTRSQQETGNYTRLVLOFELRRNVLYFILETYVPSSTFLV 258  
O09028|GABRP\_Rattus\_norvegicus TCNMDLSKYPMDTQTKLQLESWGVDGNDVEFSWLRGNSVVRGLEHLRLAQYTIQYFTLVTVSQQETGNYTRLVLOFELRRNVLYFILETYVPSSTFLV 258  
Q8QZW7|GABRP\_Mus\_musculus TCNMDLSKYPMDTQTKLQLESWGVDGNDVEFSWLRGNSVVRGLEHLRLAQYTIQYFTLVTVSQQETGNYTRLVLOFELRRNVLYFILETYVPSSTFLV 258  
E2RS87|GABRP\_Canis\_lupus\_familiaris ACNMDLSKYPMDTQTKLQLESWGVDGNDVEFSWLRGNSVVRGLEHLRLAQYTIQRYFTLVTRSQQETGNYTRLVLOFELRRNVLYFILETYVPSSTFLV 297  
XP\_021330000.1|GABRP\_Danio\_riero ACNMDLTKYPMDRQECTLQLESWGYNLEDVVFYWTRGNSVVKGLDTRLRLAQYSVESYYSVTKAVYETGLYPKLILHFALRRNVLYFFILETYVPSSTLLV 275  
Q5EA06|GABRP\_Bos\_taurus ACNMDLSKYPMDTQTKLQLESWGVDGNDVEFSWLRGNSVVRGLEHLRLAQYTIQYFTLVTRSQQETGNYTRLVLOFELRRNVLYFILETYVPSSTFLV 258  
M3YN80|GABRP\_Mustela\_putorius\_furo ACNMDLSKYPMDTQTKLQLESWGVDGNDVEFSWLRGNSVVRGLEHLRLAQYTIQRYFTLVTRSQQETGNYTRLVLOFELRRNVLYFILETYVPSSTFLV 258  
.....210.....220.....230.....240.....250.....260.....270.....280.....290.....300

000591|GABRP\_Homo\_sapiens LSWVSFWISLDSVPARTCIGVTTVLSMTTLMIGSRTSLPNTNCFIKAIDVYLGICFSFVFGALLEYAVAHYSSLOQMAAKD--RGTTKVEVEVSIITNIIIN 356  
A0A2R8ZJ77|GABRP\_Pan\_paniscus LSWVSFWISLDSVPARTCIGVTTVLSMTTLMIGSRTSLPNTNCFIKAIDVYLGICFSFVFGALLEYAVAHYSSLOQMAAKD--RGTTKVEVEVSIITNIIIN 356  
A0A2J8LXV6|GABRP\_Pan\_troglodytes LSWVSFWISLDSVPARTCIGVTTVLSMTTLMIGSRTSLPNTNCFIKAIDVYLGICFSFVFGALLEYAVAHYSSLOQMAAKD--RGTTKVEVEVSIITNIIIN 356  
A0A1D5QJZ6|GABRP\_Macaca\_mulatta LSWVSFWISLDSVPARTCIGVTTVLSMTTLMIGSRTSLPNTNCFIKAIDVYLGICFSFVFGALLEYAVAHYSSLOQMAAKD--RGTTKVEVEVSIITNIIIN 356  
O09028|GABRP\_Rattus\_norvegicus LSWVSFWISLDSVPARTCIGVTTVLSMTTLMIGSRTSLPNTNCFIKAIDVYLGICFSFVFGALLEYAVAHYSSLOQMAVVD--RGPAKDSEEVNITNIIIN 356  
Q8QZW7|GABRP\_Mus\_musculus LSWVSFWISLDSVPARTCIGVTTVLSMTTLMIGSRTSLPNTNCFIKAIDVYLGICFSFVFGALLEYAVAHYSSLOQMAVVD--RGPAKDSEEVNITNIIIN 356  
E2RS87|GABRP\_Canis\_lupus\_familiaris LSWVSFWISLDSVPARTCIGVTTVLSMTTLMIGSRTSLPNTNCFIKAIDVYLGICFSFVFGALLEYAVAHYSSLOQMAAKD--RGTSKVEVEVSIITNIIIN 395  
XP\_021330000.1|GABRP\_Danio\_riero LSWVSFWISQSVPARTCIGVTTVLTMTTLMMGARTSLPNANCFIKAIDVYLGICFTFIFGALLEYACAHFCTMQHQTIIDVRELLKFEFESNGTTHLV 375  
Q5EA06|GABRP\_Bos\_taurus LSWVSFWISLDSVPARTCIGVTTVLSMTTLMIGSRTSLPNTNCFIKAIDVYLGICFSFVFGALLEYAVAHYSSLOQMAAKD--RGKAKEVEEVNITNIIIN 356  
M3YN80|GABRP\_Mustela\_putorius\_furo LSWVSFWISLDSVPARTCIGVTTVLSMTTLMIGSRTSLPNTNCFIKAIDVYLGICFSFVFGALLEYAVAHYSSLOQMAAKD--RGTAKVEVEEVNITNIIIN 356  
.....310.....320.....330.....340.....350.....360.....370.....380.....390.....400

000591|GABRP\_Homo\_sapiens SSISFFKRKISFASIEISDN---VDYSDLTMTKTSK-FKFVFRKMGRIVDY-FITIQNSNVDRYSKLLFPLIFMLANVFYWAYMYF 440  
A0A2R8ZJ77|GABRP\_Pan\_paniscus SSISFFKRKISFASIEISDN---VDYSDLTMTKTSK-FKFVFRKMGRIVDY-FITIQNSNVDRYSKLLFPLIFMLANVFYWAYMYF 440  
A0A2J8LXV6|GABRP\_Pan\_troglodytes SSISFFKRKISFASIEISDN---VDYSDLTMTKTSK-FKFVFRKMGRIVDY-FITIQNSNVDRYSKLLFPLIFMLANVFYWAYMYF 440  
A0A1D5QJZ6|GABRP\_Macaca\_mulatta SSISFFKRKISFASIEISDN---VDYSDLTMTKTSK-FKFVFRKMGRIVDY-FITIQNSNVDRYSKLLFPLIFMLANVFYWAYMYF 440  
O09028|GABRP\_Rattus\_norvegicus SSISFFKRKISFASIEISDN---VNYSDLTMTKASDK-FKFVFRKIGRIIDY-FITIQNSNVDRYSKLLFPLIFMLANVFYWAYMYF 440  
Q8QZW7|GABRP\_Mus\_musculus SSISFFKRKISFASIEISDN---VNYSDLTMTKASDK-FKFVFRKIGRIIDY-FITIQNSNVDRYSKLLFPLIFMLANVFYWAYMYF 440  
E2RS87|GABRP\_Canis\_lupus\_familiaris SSISFFKRKISFASIEISDN---VDYSDLTMTKTSK-FKLVRDKMGRIVDY-FITIQNSNVDRYSKLLFPLIFMLANVFYWAYMYF 479  
XP\_021330000.1|GABRP\_Danio\_riero SSMFPRKMKTESDKQEKPEQIVTCEENEAIEQTKKEGCGGLTTVKQMSKRAASMMVSNPHNIDREARILFPMAPLLINIFYWLYYLLF 464  
Q5EA06|GABRP\_Bos\_taurus SSISFFKRKISFASIEISDN---VDYSDLTMTKTSK-FKFVFRDKLGRIVDY-FITIQNSNVDRYSKLLFPLIFMLANVFYWAYMYF 440  
M3YN80|GABRP\_Mustela\_putorius\_furo SSISFFKRKISFASIEISDN---VDYSDLTMTKTSK-FKFVFRDKMGRIVDY-FITIQNSNVDRYSKLLFPLIFMLANVFYWAYMYF 440  
.....410.....420.....430.....440.....450.....460.....470.....480.....

Q9UN88|GABRQ\_Homo\_sapiens MGIRGMLRAAVILLIRTLWLAEGNYPSPPIPKFHFHFEFSSAVPEVVLNLFNCKNCANEAVVQKILDVRLSRDYVRLRPNFGGAPVPVVRISIVYVTSIEQISEM 100
A0A2R9ALH2|GABRQ\_Pan\_paniscus MGIRGMLRAAVILLIRTLWLAEGNYPSPPIPKFHFHFEFSSAVPEVVLNLFNCKNCANEAVVQKILDVRLSRDYVRLRPNFGGAPVPVVRISIVYVTSIEQISEM 100
A0A6D2XJH7|GABRQ\_Pan\_troglodytes MGIRGMLRAAVILLIRTLWLAEGNYPSPPIPKFHFHFEFSSAVPEVVLNLFNCKNCANEAVVQKILDVRLSRDYVRLRPNFGGAPVPVVRISIVYVTSIEQISEM 100
F7F4H9|GABRQ\_Macaca\_mulatta MGIRGMLRAAVILLIRTLWLAEGNYPSPPIPKFHFHFEFSSAVPEVVLNLFNCKNCANEAVVQKILDVRLSRDYVRLRPNFGGAPVPVVRISIVYVTSIEQISEM 100
M3YJY6|GABRQ\_Mustela\_putorius\_furo MGIRGMLRAAVILLIRTLWLAESHDPSPTEPFHFELSPVPEVVLNLFNCKNCANEAVVHKILDVRLSKYDVRLRPNFGGAPVPVGISIMYVSSIEQISEM 100
G3V875|GABRQ\_Rattus\_norvegicus ----MLRAAALLLLIRTLWLAESNDPSPTPKFHFELSSMPEVILDLFNCKNCANEAVVQKILDVRLSTYDVRLRPNFGGAPVPVSVISIVYVSSIEQISEI 95
Q9JLFL1|GABRQ\_Mus\_musculus MGIRGMLRAAALLLLIRTLWLAESNGPSPPIPKFHFELSSSTEPEVILDLFNCKNCANEAVVQKILDVRLSTYDVRLRPNFGGAPVPVSVISIVYVSSIEQISEI 100
F6XRK3|GABRQ\_Canis\_lupus\_familiaris MGIRGILRAAVLLLLIRTLWLAEGNEPSPTPKFHFELSPVPEVILNLFNCKKCANEGVVHKILDVRLSNYDVRLRPNFGGAPVPVGVSMYVSSIEQISEM 100
E1BJH4|GABRQ\_Bos\_taurus MSIRGMLRAAVFLLLRITWLAEGSDLSSTPKFHFELSSTVPEVVLNLFDCNCKANAEATVHKILDVRLSNYDSRLRPNFGGTPVPVGVSIYVSSIEQISEV 100
F1Q4Y6|GABRB4\_Danio\_riero -----MLGPQEDKLCGIVSALAAL-SFVCFQSSSTGSTGI-SVAKTTVDKLLKGYDIRLRPFDGGPPVIVGMSINIASIDSISEV 79
1.....10.....20.....30.....40.....50.....60.....70.....80.....90.....100

Q9UN88|GABRQ\_Homo\_sapiens NMDYITIMFFHQTWKDSRLAYEYETTLNLLDLYRMHEKLVWVPCYFNLKDAFVHDVTVENRVFQLHPDGTVRYGIRLTTTAAACSLDLHKFPMDKQACNLV 200
A0A2R9ALH2|GABRQ\_Pan\_paniscus NMDYITIMFFHQTWKDSRLAYEYETTLNLLDLYRMHEKLVWVPCYFNLKDAFVHDVTVENRVFQLHPDGTVRYGIRLTTTAAACSLDLHKFPMDKQACNLV 200
A0A6D2XJH7|GABRQ\_Pan\_troglodytes NMDYITIMFFHQTWKDSRLAYEYETTLNLLDLYRMHEKLVWVPCYFNLKDAFVHDVTVENRVFQLHPDGTVRYGIRLTTTAAACSLDLHKFPMDKQACNLV 200
F7F4H9|GABRQ\_Macaca\_mulatta NMDYITIMFFHQTWKDSRLAYEYETTLNLLDLYRMHEKLVWVPCYFNLKDAFVHDVTVENRVFQLHPDGTVRYGIRLTTTAAACSLDLHKFPMDKQACNLV 200
M3YJY6|GABRQ\_Mustela\_putorius\_furo TMDYITIMFFHQTWKDPRLAYHETNLNLLDLYRMLEKLVWVPCYFNLKDAFVHDVTVENRVFQLHPDGTVRYGMRLTTTAAACSLDLQKFPMDKQACKLE 200
G3V875|GABRQ\_Rattus\_norvegicus NMDYITIMFLHQTWKDTRLAYEYETNLNLLDLYRMHEKLVWVPCYFVNSKDAFVHDVTVENRVFQLHPDGTVQYGIIRLTTTAAACSLDLQKFPMDKQACKLE 195
Q9JLFL1|GABRQ\_Mus\_musculus NMDYITIMFLHQTWKDTRLAYEYETNLNLLDLYRMHEKLVWVPCYFVNSKDAFVHDVTVENRVFQLHPDGTVRYGIRLTTTAAACSLDLQKFPMDKQACKLE 200
F6XRK3|GABRQ\_Canis\_lupus\_familiaris TMDYITIMFFHQTWKDPRLAYHETNLNLLDLYRMLEKLVWVPCYFNLKDAFVHDVTVENRVFQLHPDGTVRYGMRLTTTAAACSLDLQKFPMDKQACKLE 200
E1BJH4|GABRQ\_Bos\_taurus TMDYITIMFFHQTWKDPRLAYHETNLNLLDLYRLFELKLVWVPCYFNLKDAFVHDVTVENRVFQLHPDGTVRYGIRLTTTAAACSMNLEKFPMDKQACKLE 200
F1Q4Y6|GABRB4\_Danio\_riero NMDYITIMYFQOSWRDKRLAYAEMLNLLDNRVADQLWLPTDYFLNDDKKSFLHGVVKNRMRIRLHPDGTVLYGLRITTTAAACMMDLRRYPLDEONCTLE 179
.....110.....120.....130.....140.....150.....160.....170.....180.....190.....200

Q9UN88|GABRQ\_Homo\_sapiens VESYGYTVEDIILFWDDNGNAIHMTEELHIPQFTFLGRITTSKEVYFYTGSIYRILILKFOVQREVNSYLQVYVWPTVLTITTSWISFWMNYDSSAARVTI 300
A0A2R9ALH2|GABRQ\_Pan\_paniscus VESYGYTVEDIILFWDDNGNAIHMTEELHIPQFTFLGRITTSKEVYFYTGSIYRILILKFOVQREVNSYLQVYVWPTVLTITTSWISFWMNYDSSAARVTI 300
A0A6D2XJH7|GABRQ\_Pan\_troglodytes VESYGYTVEDIILFWDDNGNAIHMTEELHIPQFTFLGRITTSKEVYFYTGSIYRILILKFOVQREVNSYLQVYVWPTVLTITTSWISFWMNYDSSAARVTI 300
F7F4H9|GABRQ\_Macaca\_mulatta VESYGYTVEDIILFWDDNGNAIHMTEELHIPQFTFLGRITTSKEVYFYTGSIYRILILKFOVQREVNSYLQVYVWPTVLTITTSWISFWMNYDSSAARVTI 300
M3YJY6|GABRQ\_Mustela\_putorius\_furo VESYGYTVEDIVLWEGDGNAIQGTEQLHIPQFSFLGKTMSSKEMAFYTGSIYRILILKFLVQREITSYLQVYVWPTVLTITTSWISFWMNYESSAARVTI 300
G3V875|GABRQ\_Rattus\_norvegicus VESYGYTVEDIVLSWE-DDNAIHITDELHIPQYTYLGRITTSKEVYFYTGSIYRILILKFOVQREVNSYLQVYVWPTVLTITTSWISFWMNYDSSAARVTI 294
Q9JLFL1|GABRQ\_Mus\_musculus VESYGYTVEDIVLSWE-DDNAIHITDGLHIPQYTYLGRITTSKEVYFYTGSIYRILILKFOVQREVNSYLQVYVWPTVLTITTSWISFWMNYDSSAARVTI 299
F6XRK3|GABRQ\_Canis\_lupus\_familiaris VESYGYTVEDIVLWEGNGNAIQGTEKLIHIPQFSFLGKTMSSKEVFYTGSIYRILILKFLVQREVITSYLQVYVWPTVLTITTSWISFWMNYESSAARVTI 300
E1BJH4|GABRQ\_Bos\_taurus VESYGYTVDDIVLWEGSGNAVQGTEKLIHIPQFSFLGKITTSKEVFYTGSIYRILILKFLVQREVITSYLQVYVWPTVLTITTSWISFWMNYESSAARVTI 300
F1Q4Y6|GABRB4\_Danio\_riero IESYGYTTDDIVFFWQGGDNAVIGVDKLELPQFSIVELRLVSRVRFITGSIYRILILKFLVQREVITSYLQVYVWPTVLTITTSWISFWMNYDASARVAL 279
.....210.....220.....230.....240.....250.....260.....270.....280.....290.....300

Q9UN88|GABRQ\_Homo\_sapiens GLTSMILILTTIDSHLRDCLPNISCIKAIDIYILVCLFFVFLSLEYVYINYLFFYSR-GPRRQPRRRRRRRRV-IAHYRYQQVAVG----- 383
A0A2R9ALH2|GABRQ\_Pan\_paniscus GLTSMILILTTIDSHLRDCLPNISCIKAIDIYILVCLFFVFLSLEYVYINYLFFYSR-GPRRQPRRRRRRRRV-IAHYRYQQVAVG----- 383
A0A6D2XJH7|GABRQ\_Pan\_troglodytes GLTSMILILTTIDSHLRDCLPNISCIKAIDIYILVCLFFVFLSLEYVYINYLFFYSR-GPRRQPRRRRRRRRV-IAHYRYQQVAVG----- 383
F7F4H9|GABRQ\_Macaca\_mulatta GLTSMILILTTIDSHLRDCLPNISCIKAIDIYILVCLFFVFLSLEYVYINYLFFYSR-GPRRQPRRRRRRRRV-IAHYRYQQVAVG----- 383
M3YJY6|GABRQ\_Mustela\_putorius\_furo GLTSMILILNAINSHLRDCLPVACIKAIIDIYMVVCFVFLSLEYVYINYLFFYSRGRSRRTQRRRRARRV-MARYRYQEVTVQ----- 384
G3V875|GABRQ\_Rattus\_norvegicus GLTSMILVLTIDSHMRDCLPHISCIKAIDIYILVCLFFVFLSLEYVYINYLFFFSQ-APRRNHRRRCRKRPRV-VARYRYQEVVVA----- 377
Q9JLFL1|GABRQ\_Mus\_musculus GLTSMILVLTIDSHMRDCLPHISCIKAIDIYILVCLFFVFLSLEYVYINYLFFFSQ-VPRRNHRRRCRKRPRV-VARYRYQEVVVA----- 382
F6XRK3|GABRQ\_Canis\_lupus\_familiaris GLTSMILILNAINSHLRDCLPVACIKAIIDIYMVVCFVFLSLEYVYINYLFFYSRGRSRRNRRRRRRARRV-MARYRYREVMQLQPFANRRSQEEMILSV 399
E1BJH4|GABRQ\_Bos\_taurus GLTSMILILNAINSHLRNCFPQFSCIKAIIDIYMVVCFVFLSLEYVYINYLFFYSRGRSRRSRHSQRQLRRALRV-MERYRYREVIHV----- 384
F1Q4Y6|GABRB4\_Danio\_riero GVITVLTMTTINSHLRETLPKIPYVKAIDVYLMGCFVFLALLEYAFVNYVFFGR-GPQQCKKINERLNKANERPRYEEKRLR----- 363
.....310.....320.....330.....340.....350.....360.....370.....380.....390.....400

Q9UN88|GABRQ\_Homo\_sapiens -----NVQDGLINVEDGV-----SSLPIIPAQAPLASPELSGLSTSTSEQAQLATSELSPLTS 437
A0A2R9ALH2|GABRQ\_Pan\_paniscus -----NVQDGLINVEDGV-----SSLPIIPAQAPLASPELSGLSTSTSEQAQLATSELSPLTS 437
A0A6D2XJH7|GABRQ\_Pan\_troglodytes -----NVQDGLINVEDGV-----SSLPIIPAQAPLASPELSGLSTSTSEQAQLATSELSPLTS 437
F7F4H9|GABRQ\_Macaca\_mulatta -----NVQDGLINVEDGV-----SSLPIIPAQAPLASPELSGLSTSTSEQAQLATSELSPLTS 437
M3YJY6|GABRQ\_Mustela\_putorius\_furo -----SRAGDTEGDQISIEDES-----GSLSSRPVQACLASLESLSLLIPGQAPLATSELSLSS 443
G3V875|GABRQ\_Rattus\_norvegicus -----NVQDGLINVEDRVEDRAGPLPDSMPQAHLASQESLGLSVMFTSEEAQPLATSELSLSS 435
Q9JLFL1|GABRQ\_Mus\_musculus -----NVQDGLINVEDRVEDRAGPLPDSMPQAHLASQESLGLSVMFTSEEAQPLATSELSLSS 440
F6XRK3|GABRQ\_Canis\_lupus\_familiaris EIEDTHIATVDEESPLSPLSPPPVLIHVGLANPDAINVSTISLREDQISIEDES-----GSLSSRPARACLASLESLSLLIPGQAPLATSELSLSS 495
E1BJH4|GABRQ\_Bos\_taurus -----TAFNDQVHLEDET-----DPPSPSPWAGLASPELSGLSLATSELSLSS 438
F1Q4Y6|GABRB4\_Danio\_riero -----EQDSISA-----PQS-----NTLR 379
.....410.....420.....430.....440.....450.....460.....470.....480.....490.....500



```

: . : . . : : : . : . : . :
Q9UN88|GABRQ_Homo_sapiens      LSGQAPLATGESLSDLPSTSEQARHSYG-VRFNGFQADDSIFPTEIRNRVEAHGHGVTHDHEDSNESLSSDERHGHG--PSGKPLHHGEKGVQEAGWD- 533
A0A2R9ALH2|GABRQ_Pan_paniscus LSGQAPLATGESLSDLPSTSEQARHSYG-VRFNGFQADDSIIPTEIRNRVEAHGHGVTHDHEDSNESLSSDERHGHG--PSGKPLHHGEKGVQEAGWD- 533
A0A6D2XHJ7|GABRQ_Pan_troglodytes LSGQAPLATGESLSDLPSTSEQARHSYG-VRFNGFQADDSIIPTEIRNRVEAHGHGVTHDHEDSNESLSSDERHGHG--PSGKPLHHGEKGVQEAGWD- 533
F7F4H9|GABRQ_Macaca_mulatta      LSGQAPLATGESLSDLPSTSEQARHSYG-VRFNGFQADDSIIPTEIRNRVEAHGHGVTHDHEDSNESLSSDERHGHG--PSGKPLHHGEKGVQEAGWD- 533
M3YJY6|GABRQ_Mustela_putorius_furo LSEQAWTGSRESLSDRPSTSEQALHRNG-FHFSGSETDDGVICPEIHNRAADAHGHADTRDPEDPKENLSSDESHGHG--PRGRYLLVYGHRCVQEASYS- 539
G3V875|GABRQ_Rattus_norvegicus   ASSQVQLATGESLGDLPSTSEQTLFDYT-IHFHGFLLNDSILPIKIRSHSDALG-----DEDSEESLSSEESYHGGSPTGRKLQISRCVQEASWD- 527
Q9JLF1|GABRQ_Mus_musculus        ASSQVQLATGESLSDLPSTSEQTVPECT-IHFHGFLLNDSIIPKIHRSRDACD-----DEDSEESLSSEESYHGGSPTGRKLQISRCVQEASWD- 532
F6XR33|GABRQ_Canis_lupus_familiaris LSELASLASRESLSDLPSTPEQAPHRYG-IHVNFGFENDDSVTPTEMRNLAEAHDHAEISDPEDPEENFSLDESFPVHI--PSGRPLLLYGHRRVREASCSL 592
E1BJH4|GABRQ_Bos_taurus          LSDGASLATTESLSDLPSTSEQVVHDDG-IRVNGIDVNSVVPTEIRNLAETHD-----PEEDPGESSDSDES EDNG--PSKKRLLVHGQRHVQEATYEL 530
F1Q4Y6|GABRB4_Danio_erio         YIQRRNLY-----LEEQRKVGVDAYGNILLTTLNNEVMPSPDVGVSSV-----SDSRNSVMSFDSGQVFRKPMGSR----- 446
.....510.....520.....530.....540.....550.....560.....570.....580.....590.....600

```

```

: . : . * . * : . : . : : .
Q9UN88|GABRQ_Homo_sapiens      -----L-----DDNNDKSDCLAIKEQFKCDTNSTWGLNDDDELMAHGQEKD--SSSESEDS CPPSPGCSFTEGFSFDLFPDYPVKVDKWS 611
A0A2R9ALH2|GABRQ_Pan_paniscus   -----L-----DDNNDKSDCLAIKEQFKCDTNSTWGLNDDGLMAHGQEKD--SSSESEDS CPPSPGCSFTEGFSFDLFPDYPVKVDKWS 611
A0A6D2XHJ7|GABRQ_Pan_troglodytes -----L-----DDNNDKSDCLAIKEQFKCDTNSTWGLNDDGLMAHGQEKD--SSSESEDS CPPSPGCSFTEGFSFDLFPDYPVKVDKWS 611
F7F4H9|GABRQ_Macaca_mulatta      -----L-----DDNSVKSGCLAVEEQKCDTNSTWGLNEDELMAHGHEKD--NSSESEDS CPPSPGCSFTEGFSFDLFPDYPVKVDKWS 611
M3YJY6|GABRQ_Mustela_putorius_furo -----LEEIRSLPDDIRVESGYLDLEKQLRRDLSTWSLNV DGLPGFDQDKD--SNSESDSRPPSPRCFSFSEVFSKLFDPDYPVKVDKWS 624
G3V875|GABRQ_Rattus_norvegicus   -----IDKIESLQDDISIKSWLGLDEQRKGDADSIWSLTDEELMACDQEKDSSSSSESEES CSPSPGCSFNEGFSFQLFNPNRVPKVDKWS 614
Q9JLF1|GABRQ_Mus_musculus        -----LDKIEILQDDISITSWLGLDEQCKGDADSIWSLTDEELMACDQEKD--SSSESEENCSPSPGCSFNEGFSFQLFNPNRVPKVDKWS 617
F6XR33|GABRQ_Canis_lupus_familiaris DEIRSNLNEIRSNLDEIRSLPDDIRVESGYLDLEKQLRYDL-YNWRPNAKKFMRLNRRKD--SNSESDSRPPSPGCSFTEGFSKLFDPDYPVKVDKWS 689
E1BJH4|GABRQ_Bos_taurus          QEICNT-----LRDIHSLPDDVIVESGYPDLEEQLRKRVDSTGSLHSDDFMDFDGDKD--SNSESDSNFPPSPGCSFSGKFSFDLFPDYPVKVDQCC 621
F1Q4Y6|GABRB4_Danio_erio         -----DGFSHSLDR--SAMRSTRANCLRRRS--KLKLIKIPNLTDVSTIDKWS 491
.....610.....620.....630.....640.....650.....660.....670.....680.....690.....700

```

```

*:*:*:* .*:~*~* *~:
Q9UN88|GABRQ_Homo_sapiens      RFLFPLAFGLFNIVYVWVYHMY 632
A0A2R9ALH2|GABRQ_Pan_paniscus  RFLFPLAFGLFNIVYVWVYHMY 632
A0A6D2XHJ7|GABRQ_Pan_troglodytes RFLFPLAFGLFNIVYVWVYHMY 632
F7F4H9|GABRQ_Macaca_mulatta      RFLFPLAFGLFNIVYVWVYHMY 632
M3YJY6|GABRQ_Mustela_putorius_furo RILFPLAFVVFNIYVWAYHLY 645
G3V875|GABRQ_Rattus_norvegicus   RFLFPLSFGLFNIVYVWLYHY 635
Q9JLF1|GABRQ_Mus_musculus        RFLFPLSFGLFNIVYVWLYHY 638
F6XR33|GABRQ_Canis_lupus_familiaris RILFPLAFVVFNIYVWAYHLN 710
E1BJH4|GABRQ_Bos_taurus          RLLFPLAFVVFNIYVWVYHY 642
F1Q4Y6|GABRB4_Danio_erio         RIIFPITFGFFNLIYWLYYVN 512
.....710.....720.

```



```

****:::
P24046|GABRR1_Homo_sapiens      IYWSIFS- 479
A0A2R9BL98|GABRR1_Pan_paniscus  IYWSIFS- 479
H2QTE3|GABRR1_Pan_troglodytes   IYWSIFS- 479
F6W0N4|GABRR1_Macaca_mulatta     IYWSIFS- 480
P50572|GABRR1_Rattus_norvegicus  IYWSIFS- 480
P56475|GABRR1_Mus_musculus       IYWSIFS- 480
M3YD49|GABRR1_Mustela_putorius_furo IYWSIFS- 461
XP_038538749.1|GABRR1_Canis_lupus_familiaris IYWSIFS- 480
Q5TZ16|GABRR1_Danio_rerio       IYWSIYSC 466
Q0II76|GABRR1_Bos_taurus         IYWSVFA- 465
.....

```



```

*:.
P28476|GABRR2_Homo_sapiens|VFS|465
P47742|GABRR2_Rattus_norvegicus|VFS|465
P56476|GABRR2_Mus_musculus|VFS|465
A0A2R9AXF6|GABRR2_Pan_paniscus|VFS|461
XP_527448.5|GABRR2_Pan_troglodytes|VFS|490
XP_001095465.3|GABRR2_Macaca_mulatta|VFS|490
M3YCV9|GABRR2_Mustela_putorius_furo|VFS|490
E2R4R0|GABRR2_Canis_lupus_familiaris|VFS|465
F1QX34|GABRR2a_Danio_rerio|VFC|475
Q0II76|GABRR2_Bos_taurus|VFA|465
...

```



| #   | Name                        | SMILES                                                                                                                                                                                                                      |
|-----|-----------------------------|-----------------------------------------------------------------------------------------------------------------------------------------------------------------------------------------------------------------------------|
| 1   | ACAMPROSATE                 | <chem>S(=O)(=O)(O)CCNC(=O)C</chem>                                                                                                                                                                                          |
| 2   | ALPRAZOLAM                  | <chem>C1c4cc2c(n1c(nnc1C)CN=C2c3ccccc3)cc4</chem>                                                                                                                                                                           |
| 3   | AMOBARBITAL                 | <chem>O=C1NC(=O)C(C(=O)N1)(CCC(C)C)CC</chem>                                                                                                                                                                                |
| 4   | AMOXAPINE                   | <chem>C1c4cc2c(Oc3c(N=C2N1CCNCC1)cccc3)cc4</chem>                                                                                                                                                                           |
| 5   | APALUTAMIDE                 | <chem>S=C3N(c1cnc(c(c1)C(F)(F)F)C#N)C(=O)C4(N3c2cc(F)c(cc2)C(=O)NC)CCC4</chem>                                                                                                                                              |
| 6   | BARBITAL                    | <chem>O=C1NC(=O)C(C(=O)N1)(CC)CC</chem>                                                                                                                                                                                     |
| 7   | BENTAZEPAM                  | <chem>s2c1NC(=O)CN=C(c1c3c2CCCC3)c4ccccc4</chem>                                                                                                                                                                            |
| 8   | BREXANOLONE                 | <chem>O=C([C@@H]4[C@@]3([C@H]([C@H]2[C@@H]([C@@]1([C@H](C[C@H](O)CC1)CC2)C)CC3)CC4)C)C</chem>                                                                                                                               |
| 9   | BROMAZEPAM                  | <chem>BrC3cc2c(NC(=O)CN=C2c1ncccc1)cc3</chem>                                                                                                                                                                               |
| 10  | BUTALBITAL                  | <chem>O=C1NC(=O)C(C(=O)N1)(CC=C)CC(C)C</chem>                                                                                                                                                                               |
| 11  | BUTOBARBITAL                | <chem>O=C1NC(=O)C(C(=O)N1)(CCCC)CC</chem>                                                                                                                                                                                   |
| 12  | CARISOPRODOL                | <chem>O=C(OCC(COC(=O)N)(CCC)C)NC(C)C</chem>                                                                                                                                                                                 |
| 13  | CHLORDESMETHYLDIAZEPAM      | <chem>C1c1c(cccc1)C3=NCC(=O)Nc2c3cc(C1)cc2</chem>                                                                                                                                                                           |
| 14  | CHLORDIAZEPOXIDE            | <chem>C1c3cc1c(N=C(NC)CN(=O)=C1c2cccc2)cc3</chem>                                                                                                                                                                           |
| 15  | CINOLAZEPAM                 | <chem>C1c3cc2c(N(C(=O)C(O)N=C2c1c(F)cccc1)CCC#N)cc3</chem>                                                                                                                                                                  |
| 16  | CLOBAZAM                    | <chem>C1c3cc2N(c1ccccc1)C(=O)CC(=O)N(c2cc3)C</chem>                                                                                                                                                                         |
| 17  | CLONAZEPAM                  | <chem>C1c1c(cccc1)C3=NCC(=O)Nc2c3cc([N+](=O)[O-])cc2</chem>                                                                                                                                                                 |
| 18  | CLORAZEPATE                 | <chem>C1c3cc1c(NC(=O)C(N=C1c2cccc2)C(=O)O)cc3</chem>                                                                                                                                                                        |
| 19  | CLOTIAZEPAM                 | <chem>C1c1c(cccc1)C3=NCC(=O)N(c2sc(cc23)CC)C</chem>                                                                                                                                                                         |
| 20  | DESFLURANE                  | <chem>FC(F)(F)C(F)OC(F)F</chem>                                                                                                                                                                                             |
| 21  | DIAZEPAM                    | <chem>C1c3cc1c(N(C(=O)CN=C1c2cccc2)C)cc3</chem>                                                                                                                                                                             |
| 22  | ENFLURANE                   | <chem>C1C(F)C(F)(F)OC(F)F</chem>                                                                                                                                                                                            |
| 23  | ESTAZOLAM                   | <chem>C1c4cc2c(n1c(nnc1)CN=C2c3ccccc3)cc4</chem>                                                                                                                                                                            |
| 24  | ESZOPICLONE                 | <chem>C1c4cnc(N3C(=O)c1nccnc1[C@@H]3OC(=O)N2CCN(CC2)C)cc4</chem>                                                                                                                                                            |
| 25  | ETHANOL                     | <chem>CCO</chem>                                                                                                                                                                                                            |
| 26  | ETHCHLORVYNOL               | <chem>C1=C=C(C)C(C#C)CC</chem>                                                                                                                                                                                              |
| 27  | ETIZOLAM                    | <chem>C1c1c(cccc1)C3=NCc4nnc(n4c2sc(cc23)CC)C</chem>                                                                                                                                                                        |
| 28  | ETOMIDATE                   | <chem>O=C(OCC)c1n(cnc1)[C@@H](c2cccc2)C</chem>                                                                                                                                                                              |
| 29  | FLUDIAZEPAM                 | <chem>C1c3cc2c(N(C(=O)CN=C2c1c(F)cccc1)C)cc3</chem>                                                                                                                                                                         |
| 30  | FLUMAZENIL                  | <chem>Fc3cc2c(n1cnc(c1CN(C2=O)C)C(=O)OCC)cc3</chem>                                                                                                                                                                         |
| 31  | FLUNITRAZEPAM               | <chem>Fc1c(cccc1)C3=NCC(=O)N(c2c3cc([N+](=O)[O-])cc2)C</chem>                                                                                                                                                               |
| 32  | FLURAZEPAM                  | <chem>C1c3cc2c(N(C(=O)CN=C2c1c(F)cccc1)CCN(CC)CC)cc3</chem>                                                                                                                                                                 |
| 33  | FLUTAZOLAM                  | <chem>C1c4cc3c(N(C(=O)CN1CCOC13c2c(F)cccc2)CCO)cc4</chem>                                                                                                                                                                   |
| 34  | FOSPROPOFOL                 | <chem>P(=O)(OC)c1c(cccc1C(C)C)C(C)C(O)O</chem>                                                                                                                                                                              |
| 35  | GLUTETHIMIDE                | <chem>O=C1NC(=O)CCG1(c2cccc2)CC</chem>                                                                                                                                                                                      |
| 36  | HALAZEPAM                   | <chem>C1c3cc1c(N(C(=O)CN=C1c2cccc2)CC(F)(F)F)cc3</chem>                                                                                                                                                                     |
| 37  | HALOTHANE                   | <chem>BrC(Cl)C(F)(F)F</chem>                                                                                                                                                                                                |
| 38  | HEXOBARBITAL                | <chem>O=C1N(C(=O)C(C(=O)N1)(C2=CCCC2)C)C</chem>                                                                                                                                                                             |
| 39  | ISOFLURANE                  | <chem>C1C(OC(F)F)C(F)(F)F</chem>                                                                                                                                                                                            |
| 40a | IVERMECTIN H2B1a            | <chem>O=C6O[C@@H]2C[C@@]1(O[C@@H]([C@H](CC1)C)[C@@H](CC)C)O[C@@H](C2)CC=C([C@@H](O[C@@H]4O[C@H]([C@H](O[C@@H]3O[C@H]([C@H](O)[C@@H](OC)C3)C)[C@@H](OC)C4)C)[C@H](C=CC=C5[C@]7(O)[C@H](OC5)[C@H](O)C(=C[C@@H]67)C)C)C</chem> |
| 40b | IVERMECTIN H2B1b            | <chem>O=C6O[C@@H]2C[C@@]1(O[C@@H]([C@H](CC1)C)C(C)C)O[C@@H](C2)CC=C([C@@H](O[C@@H]4O[C@H]([C@H](O[C@@H]3O[C@H]([C@H](O)[C@@H](OC)C3)C)[C@@H](OC)C4)C)[C@H](C=CC=C5[C@]7(O)[C@H](OC5)[C@H](O)C(=C[C@@H]67)C)C)C</chem>       |
| 41  | KETAZOLAM                   | <chem>C1c4cc2c(N(C(=O)CN1C(=O)C=C(OC12c3ccccc3)C)C)cc4</chem>                                                                                                                                                               |
| 42  | LAMOTRIGINE                 | <chem>C1c1c(Cl)cccc1c2nnc(nc2N)N</chem>                                                                                                                                                                                     |
| 43  | LORAZEPAM                   | <chem>C1c1c(cccc1)C3=NC(O)C(=O)Nc2c3cc(C1)cc2</chem>                                                                                                                                                                        |
| 44  | LORMETAZEPAM                | <chem>C1c1c(cccc1)C3=NC(O)C(=O)Nc2c3cc(C1)cc2</chem>                                                                                                                                                                        |
| 45  | MEDAZEPAM                   | <chem>C1c3cc1c(N(CCN=C1c2cccc2)C)cc3</chem>                                                                                                                                                                                 |
| 46  | MEDROXYPROGESTERONE ACETATE | <chem>O=C(O[C@@]4(C(=O)C)[C@@]3([C@H]([C@H]2[C@@H]([C@@]1(C(=CC(=O)CC1)[C@H](C2)C)C)CC3)C4)C</chem>                                                                                                                         |
| 47  | MEMANTINE                   | <chem>NC12C[C@]3(C[C@@](C1)(CC(C2)C3)C)C</chem>                                                                                                                                                                             |

|    |                |                                                                                                                 |
|----|----------------|-----------------------------------------------------------------------------------------------------------------|
| 48 | MEPROBAMATE    | <chem>O=C(OCC(COC(=O)N)(CCC)C)N</chem>                                                                          |
| 49 | METHARBITAL    | <chem>O=C1N(C(=O)C(C(=O)N1)(CC)CC)C</chem>                                                                      |
| 50 | METHOHEXITAL   | <chem>O=C1N(C(=O)C(C(=O)N1)(C(C#CCC)C)CC=C)C</chem>                                                             |
| 51 | METHOXYFLURANE | <chem>ClC(Cl)C(F)(F)OC</chem>                                                                                   |
| 52 | METHYPRYLON    | <chem>O=C1NCC(C(=O)C1(C)CC)C</chem>                                                                             |
| 53 | MEXAZOLAM      | <chem>Clc1c(cccc1)C34OCC(N4CC(O)=Nc2c3cc(Cl)cc2)C</chem>                                                        |
| 54 | MIDAZOLAM      | <chem>Clc4cc3c(n1c(ncc1CN=C3c2c(F)cccc2)C)cc4</chem>                                                            |
| 55 | NIMETAZEPAM    | <chem>O=[N+]([O-])c3cc1c(N(C(=O)CN=C1c2cccc2)C)cc3</chem>                                                       |
| 56 | NITRAZEPAM     | <chem>O=[N+]([O-])c3cc1c(NC(=O)CN=C1c2cccc2)cc3</chem>                                                          |
| 57 | NORDAZEPAM     | <chem>Clc3cc1c(NC(=O)CN=C1c2cccc2)cc3</chem>                                                                    |
| 58 | OLANZAPINE     | <chem>s3c2Nc4c(N=C(N1CCN(CC1)C)c2cc3C)cccc4</chem>                                                              |
| 59 | OXAZEPAM       | <chem>Clc3cc1c(NC(=O)C(O)N=C1c2cccc2)cc3</chem>                                                                 |
| 60 | PENTOBARBITAL  | <chem>O=C1NC(=O)C(C(=O)N1)(C(CCC)C)CC</chem>                                                                    |
| 61 | PHENOBARBITAL  | <chem>O=C2NC(=O)C(c1cccc1)(C(=O)N2)CC</chem>                                                                    |
| 62 | PHENYTOIN      | <chem>O=C1NC(=O)C(N1)(c2cccc2)c3cccc3</chem>                                                                    |
| 63 | PIPERAZINE     | <chem>N1CCNCC1</chem>                                                                                           |
| 64 | PRAZEPAM       | <chem>Clc4cc1c(N(C(=O)CN=C1c2cccc2)CC3CC3)cc4</chem>                                                            |
| 65 | PRIMIDONE      | <chem>O=C2NCNC(=O)C2(c1cccc1)CC</chem>                                                                          |
| 66 | PROPOFOL       | <chem>Oc1c(cccc1C(C)C)C(C)C</chem>                                                                              |
| 67 | QUAZEPAM       | <chem>Clc3cc2c(N(C(=S)CN=C2c1c(F)cccc1)CC(F)(F)F)cc3</chem>                                                     |
| 68 | RILMAZAFONE    | <chem>Clc1c(cccc1)C(=O)c3c(n2nc(nc2CNC(=O)CN)C(=O)N(C)C)ccc(Cl)c3</chem>                                        |
| 69 | SECOBARBITAL   | <chem>O=C1NC(=O)C(C(=O)N1)(C(CCC)C)CC=C</chem>                                                                  |
| 70 | SEVOFLURANE    | <chem>FC(F)(F)C(OCF)C(F)(F)F</chem>                                                                             |
| 71 | STIRIPENTOL    | <chem>O1c2c(OC1)ccc(c2)C=C(C)C(C)C</chem>                                                                       |
| 72 | TEMAZEPAM      | <chem>Clc3cc1c(N(C(=O)C(O)N=C1c2cccc2)C)cc3</chem>                                                              |
| 73 | THIAMYLAL      | <chem>S=C1NC(=O)C(C(=O)N1)(C(CCC)C)CC=C</chem>                                                                  |
| 74 | THIOLCHICOSIDE | <chem>S(c4c(=O)ccc3c(c2c(OC)c(OC)c(O[C@@H]1O[C@@H]([C@@H](O)[C@H](O)[C@H]1O)CO)cc2CC[C@@H]3NC(=O)C)cc4)C</chem> |
| 75 | THIOPENTAL     | <chem>S=C1NC(=O)C(C(=O)N1)(C(CCC)C)CC</chem>                                                                    |
| 76 | TOPIRAMATE     | <chem>S(=O)(=O)(OC[C@]13OC(O[C@H]1[C@@H]2OC(O[C@@H]2C03)(C)C)(C)C)N</chem>                                      |
| 77 | TRIAZOLAM      | <chem>Clc1c(cccc1)C4=NCc2nnc(n2c3c4cc(Cl)cc3)C</chem>                                                           |
| 78 | TRIAZULENONE   | <chem>Clc1c(cccc1)C3=NCC4N(c2c3cc(N(=O)=O)cc2)C(=O)/C(/N=4)=C/N5CCN(CC5)C</chem>                                |
| 79 | ZALEPLON       | <chem>O=C(N(c3cc(c2n1ncc(c1ncc2)C#N)ccc3)CC)C</chem>                                                            |
| 80 | ZOLPIDEM       | <chem>O=C(N(C)C)Cc1n3c(nc1c2ccc(cc2)C)ccc(c3)C</chem>                                                           |
| 81 | ZOPICLONE      | <chem>Clc4cnc(N3C(=O)c1nccnc1C3OC(=O)N2CCN(CC2)C)cc4</chem>                                                     |

**Supplementary Table S3:** All drugs selected in this study and their respective SMILES codes.



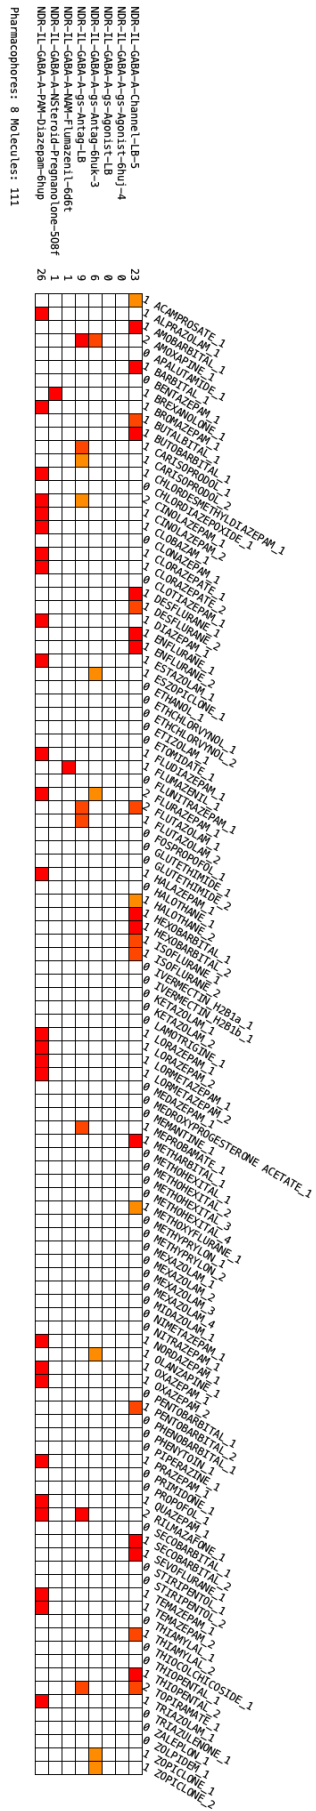

Supplementary Figure S9: Results from *in silico* profiling of 81 Drugs using selected GABA<sub>A</sub> models in the NeuroDeRisk IL Profiler V1.0.

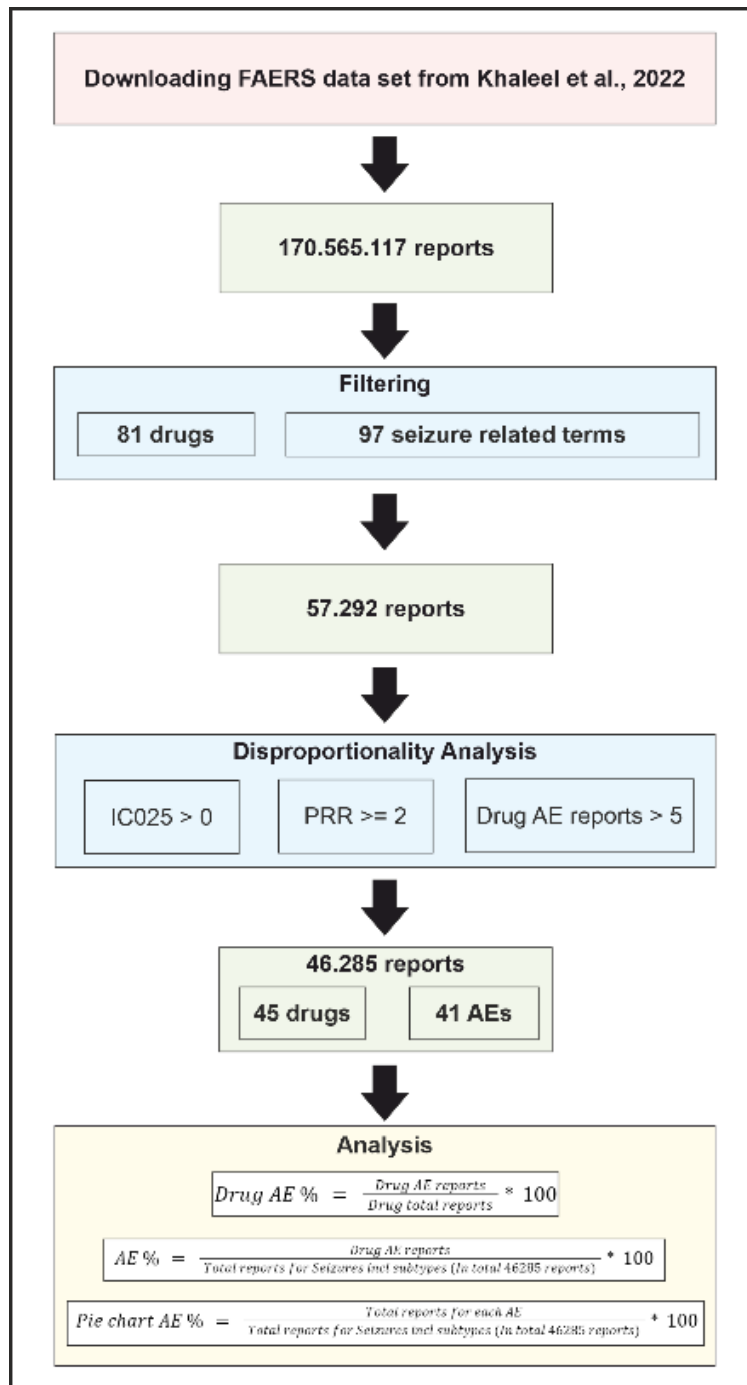

**Supplementary Figure S10. Workflow of the FAERS analysis.** Greenish boxes contain the results of the filtering processes, blue boxes describe the filtering process which was used for the FAERS data set obtained from Khaleel et al., 2022 (Khaleel *et al.*, 2022).

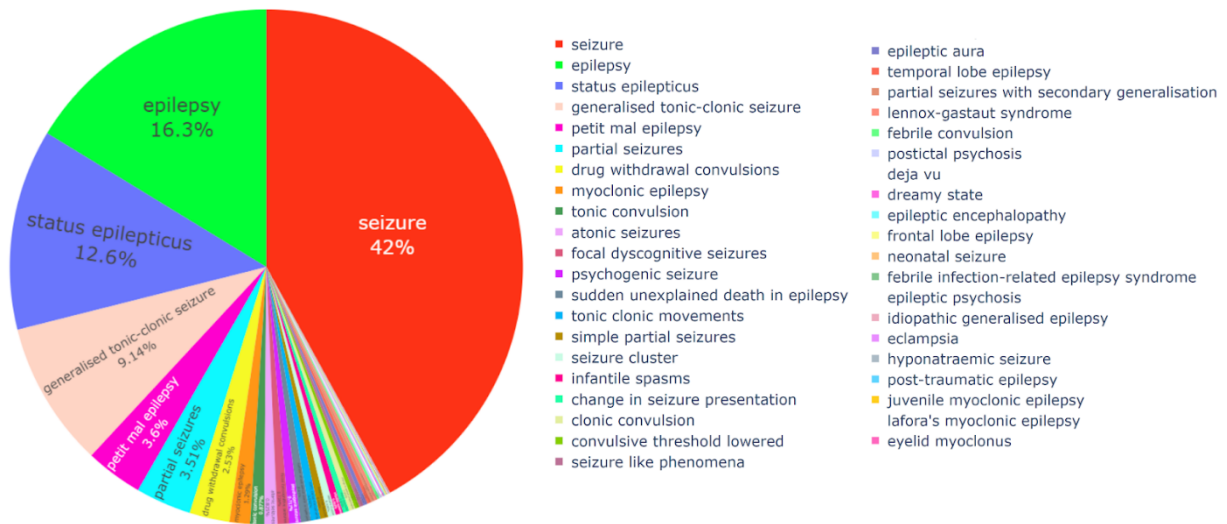

**Supplementary Figure S11:** Distribution of all seizure related reports from our analysis which are in total 46285 reports.

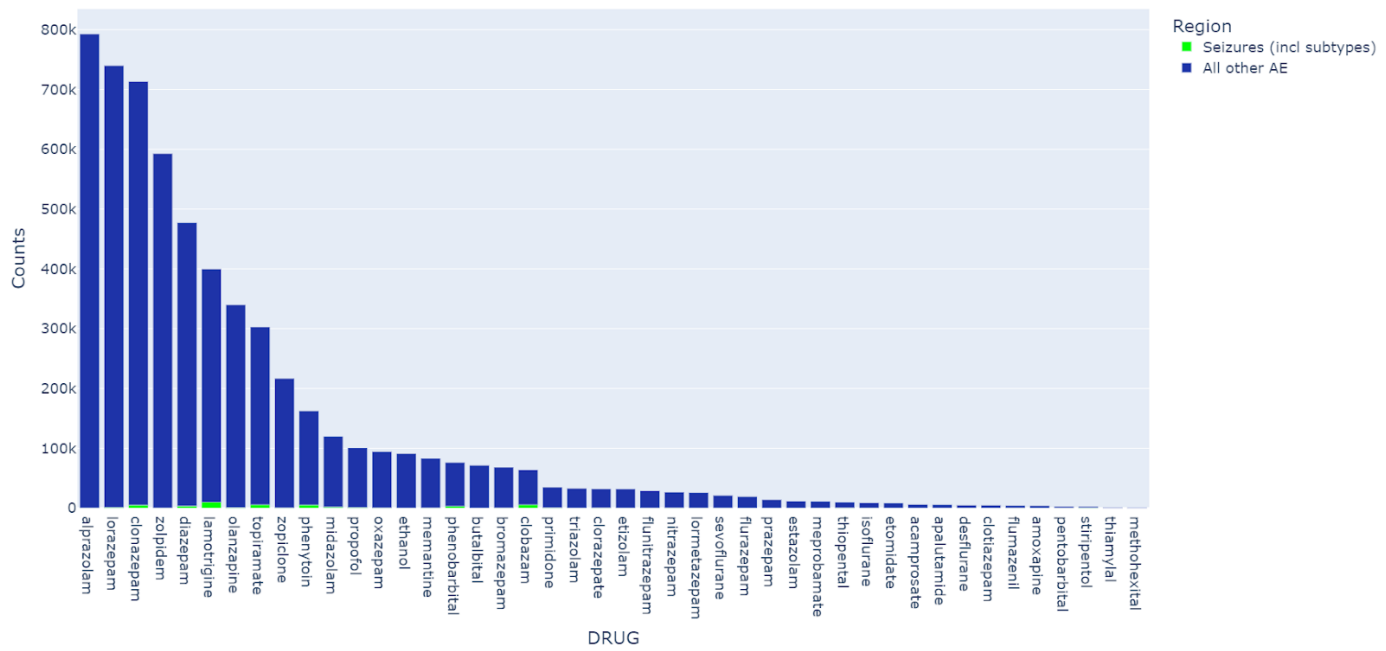

**Supplementary Figure S12:** Total report number for all drugs used, which are displayed in Figure 4. All seizure-category reports are displayed in green, all other adverse event terms as a lump sum in blue.

| Drug                   | Total reports | AE                          | AE reports |
|------------------------|---------------|-----------------------------|------------|
| ACAMPROSATE            | 587           | SEIZURE                     | 17         |
| ALPRAZOLAM             | 30031         | SEIZURE                     | 410        |
|                        |               | EPILEPSY                    | 71         |
|                        |               | STATUS EPILEPTICUS          | 44         |
|                        |               | DRUG WITHDRAWAL CONVULSIONS | 29         |
| AMOXAPINE              | 134           | SEIZURE                     | 9          |
| BROMAZEPAM             | 3047          | SEIZURE                     | 26         |
|                        |               | STATUS EPILEPTICUS          | 14         |
|                        |               | EPILEPSY                    | 13         |
| CARISOPRODOL           | 3493          | SEIZURE                     | 56         |
| CHLORDIAZEPOXIDE       | 756           | SEIZURE                     | 14         |
| CLOBAZAM               | 2070          | SEIZURE                     | 325        |
|                        |               | DRUG WITHDRAWAL CONVULSIONS | 76         |
|                        |               | EPILEPSY                    | 55         |
|                        |               | STATUS EPILEPTICUS          | 51         |
|                        |               | PARTIAL SEIZURES            | 19         |
|                        |               | FOCAL DYSCOGNITIVE SEIZURES | 12         |
|                        |               | PETIT MAL EPILEPSY          | 11         |
| CLONAZEPAM             | 18338         | SEIZURE                     | 498        |
|                        |               | STATUS EPILEPTICUS          | 66         |
|                        |               | EPILEPSY                    | 59         |
|                        |               | DRUG WITHDRAWAL CONVULSIONS | 29         |
|                        |               | PARTIAL SEIZURES            | 18         |
|                        |               | PETIT MAL EPILEPSY          | 18         |
| CLORAZEPATE DIPOASSIUM | 1205          | SEIZURE                     | 16         |
| DESFLURANE             | 509           | SEIZURE LIKE PHENOMENA      | 12         |
| DIAZEPAM               | 20293         | SEIZURE                     | 345        |
|                        |               | STATUS EPILEPTICUS          | 88         |
|                        |               | DRUG WITHDRAWAL CONVULSIONS | 69         |
|                        |               | EPILEPSY                    | 58         |
|                        |               | PARTIAL SEIZURES            | 12         |
|                        |               | PETIT MAL EPILEPSY          | 9          |
| ESTAZOLAM              | 263           | SEIZURE                     | 16         |

|                             |       |                                      |      |
|-----------------------------|-------|--------------------------------------|------|
| ESZOPICLONE                 | 7811  | SEIZURE                              | 22   |
| ETHANOL                     | 13742 | SEIZURE                              | 164  |
|                             |       | STATUS EPILEPTICUS                   | 14   |
|                             |       | EPILEPSY                             | 14   |
|                             |       | PARTIAL SEIZURES                     | 12   |
| ETIZOLAM                    | 630   | SEIZURE                              | 13   |
| FLUMAZENIL                  | 248   | SEIZURE                              | 51   |
|                             |       | DRUG WITHDRAWAL CONVULSIONS          | 42   |
| FLUNITRAZEPAM               | 875   | SEIZURE                              | 28   |
| ISOFLURANE                  | 502   | STATUS EPILEPTICUS                   | 33   |
| IVERMECTIN                  | 1764  | SEIZURE                              | 21   |
| LAMOTRIGINE                 | 26598 | SEIZURE                              | 1723 |
|                             |       | EPILEPSY                             | 228  |
|                             |       | STATUS EPILEPTICUS                   | 189  |
|                             |       | PETIT MAL EPILEPSY                   | 140  |
|                             |       | PARTIAL SEIZURES                     | 76   |
|                             |       | FOCAL DYSCOGNITIVE SEIZURES          | 54   |
|                             |       | SUDDEN UNEXPLAINED DEATH IN EPILEPSY | 41   |
|                             |       | MYOCLONIC EPILEPSY                   | 33   |
| LORAZEPAM                   | 16200 | SEIZURE                              | 291  |
|                             |       | STATUS EPILEPTICUS                   | 79   |
|                             |       | EPILEPSY                             | 76   |
|                             |       | DRUG WITHDRAWAL CONVULSIONS          | 27   |
|                             |       | PETIT MAL EPILEPSY                   | 10   |
|                             |       | PARTIAL SEIZURES                     | 9    |
| LORMETAZEPAM                | 1347  | EPILEPSY                             | 14   |
|                             |       | SEIZURE                              | 8    |
| MEDROXYPROGESTERONE ACETATE | 10874 | SEIZURE                              | 34   |
|                             |       | EPILEPSY                             | 12   |
| MEMANTINE                   | 6510  | SEIZURE                              | 190  |
|                             |       | EPILEPSY                             | 61   |
|                             |       | PETIT MAL EPILEPSY                   | 16   |
|                             |       | PARTIAL SEIZURES                     | 12   |
|                             |       | STATUS EPILEPTICUS                   | 8    |
| MEPROBAMATE                 | 781   | SEIZURE                              | 10   |

|                      |       |                                      |     |
|----------------------|-------|--------------------------------------|-----|
| <b>MIDAZOLAM</b>     | 4298  | SEIZURE                              | 123 |
|                      |       | STATUS EPILEPTICUS                   | 57  |
|                      |       | EPILEPSY                             | 21  |
|                      |       | SEIZURE LIKE PHENOMENA               | 15  |
|                      |       | FOCAL DYSCOGNITIVE SEIZURES          | 13  |
|                      |       | PETIT MAL EPILEPSY                   | 13  |
|                      |       | PARTIAL SEIZURES                     | 12  |
| <b>NITRAZEPAM</b>    | 627   | SEIZURE                              | 13  |
| <b>OLANZAPINE</b>    | 28785 | SEIZURE                              | 554 |
|                      |       | EPILEPSY                             | 137 |
|                      |       | STATUS EPILEPTICUS                   | 42  |
|                      |       | PARTIAL SEIZURES                     | 18  |
|                      |       | PETIT MAL EPILEPSY                   | 17  |
| <b>OXAZEPAM</b>      | 4627  | SEIZURE                              | 53  |
|                      |       | STATUS EPILEPTICUS                   | 17  |
|                      |       | EPILEPSY                             | 14  |
| <b>PHENOBARBITAL</b> | 2287  | SEIZURE                              | 143 |
|                      |       | STATUS EPILEPTICUS                   | 80  |
|                      |       | EPILEPSY                             | 35  |
|                      |       | PARTIAL SEIZURES                     | 15  |
|                      |       | MYOCLONIC EPILEPSY                   | 8   |
| <b>PHENYTOIN</b>     | 10126 | SEIZURE                              | 972 |
|                      |       | STATUS EPILEPTICUS                   | 204 |
|                      |       | EPILEPSY                             | 100 |
|                      |       | PARTIAL SEIZURES                     | 59  |
|                      |       | PETIT MAL EPILEPSY                   | 42  |
|                      |       | FOCAL DYSCOGNITIVE SEIZURES          | 23  |
|                      |       | SUDDEN UNEXPLAINED DEATH IN EPILEPSY | 13  |
| <b>PRIMIDONE</b>     | 711   | SEIZURE                              | 51  |
|                      |       | EPILEPSY                             | 17  |
|                      |       | PETIT MAL EPILEPSY                   | 14  |
|                      |       | MYOCLONIC EPILEPSY                   | 11  |
| <b>PROPOFOL</b>      | 7869  | SEIZURE                              | 165 |
|                      |       | STATUS EPILEPTICUS                   | 70  |
|                      |       | EPILEPSY                             | 27  |
|                      |       | SEIZURE LIKE PHENOMENA               | 25  |

|             |       |                                      |     |
|-------------|-------|--------------------------------------|-----|
|             |       | MYOCLONIC EPILEPSY                   | 12  |
| SEVOFLURANE | 1650  | SEIZURE                              | 23  |
|             | 1650  | SEIZURE LIKE PHENOMENA               | 11  |
| TEMAZEPAM   | 3519  | SEIZURE                              | 46  |
| THIOPENTAL  | 530   | STATUS EPILEPTICUS                   | 30  |
|             | 530   | SEIZURE                              | 20  |
| TOPIRAMATE  | 11307 | SEIZURE                              | 562 |
|             | 11307 | EPILEPSY                             | 85  |
|             | 11307 | STATUS EPILEPTICUS                   | 82  |
|             | 11307 | PETIT MAL EPILEPSY                   | 59  |
|             | 11307 | FOCAL DYSCOGNITIVE SEIZURES          | 31  |
|             | 11307 | PARTIAL SEIZURES                     | 30  |
|             | 11307 | DRUG WITHDRAWAL CONVULSIONS          | 21  |
|             | 11307 | MYOCLONIC EPILEPSY                   | 21  |
|             | 11307 | SUDDEN UNEXPLAINED DEATH IN EPILEPSY | 16  |
|             | 11307 | SEIZURE LIKE PHENOMENA               | 9   |
| TRIAZOLAM   | 1431  | SEIZURE                              | 12  |
| ZOLPIDEM    | 18040 | SEIZURE                              | 248 |
|             |       | DRUG WITHDRAWAL CONVULSIONS          | 39  |
|             |       | EPILEPSY                             | 38  |
|             |       | STATUS EPILEPTICUS                   | 22  |
| ZOPICLONE   | 5399  | SEIZURE                              | 70  |
|             |       | EPILEPSY                             | 28  |
|             |       | STATUS EPILEPTICUS                   | 12  |

**Supplementary Table S4:** Showing all total reports and the reports per AE per drug for the selected drugs and AEs.

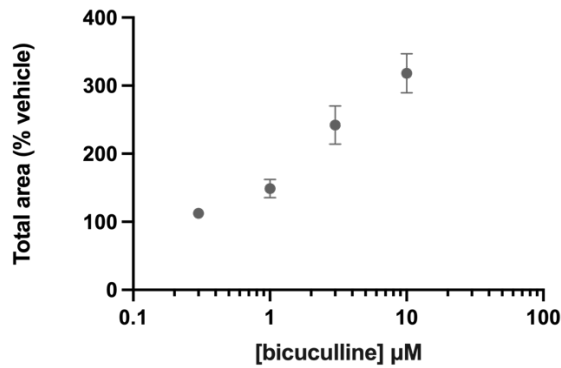

**Supplementary Figure S13:** Mean ( $\pm$  SEM) concentration-response data summary of bicuculline (0.3, 1, 3, and 10  $\mu\text{M}$ ) effects on CA1 population spike area in rat hippocampal brain slices. Statistical testing was run on raw concentration data (dose:  $F(4, 27)=57.10$   $p<.001$ ; Dunnett's posthoc: bicuculline 1, 3, and 10  $\mu\text{M}$  vs veh,  $p<.001$ ).

| BEHAVIORAL ALTERATIONS |            |      |
|------------------------|------------|------|
| Amoxapine (mM)         | Occurrence | %    |
| 0                      | 0/8        | 0%   |
| 0.003                  | 0/8        | 0%   |
| 0.01                   | 0/8        | 0%   |
| 0.03                   | 3/8        | 38%  |
| 0.1                    | 8/8        | 100% |
| 0.3                    | 8/8        | 100% |

| MORTALITY      |            |     |
|----------------|------------|-----|
| Amoxapine (mM) | Occurrence | %   |
| 0              | 0/8        | 0%  |
| 0.003          | 0/8        | 0%  |
| 0.01           | 0/8        | 0%  |
| 0.03           | 0/8        | 0%  |
| 0.1            | 0/8        | 0%  |
| 0.3            | 2/8        | 25% |

**Supplementary Table S5:** Behavioral alterations (abnormal swimming behaviour, like circling or erratic movements) and mortality of zebrafish larvae.

|                               | 1.58 $\mu\text{M}$ | 5 $\mu\text{M}$ | 15.8 $\mu\text{M}$ | 50 $\mu\text{M}$ |
|-------------------------------|--------------------|-----------------|--------------------|------------------|
| Firing Rate                   | 146                | 173             | 145                | 76               |
| Median Burst Rate             | 104                | 127             | 160                | 158              |
| Median Num of Spikes in Burst | 296                | 303             | 183                | 92               |
| Percent Isolated Spikes       | 72                 | 14              | 9                  | 35               |
| ISI CV                        | 135                | 170             | 129                | 92               |
| Normalized IQR Burst Duration | 73                 | 27              | 42                 | 49               |
| Median Burst Duration         | 145                | 124             | 71                 | 57               |
| Mean Interburst Interval      | 97                 | 79              | 65                 | 66               |
| Mean of ISI-distance          | 75                 | 41              | 36                 | 39               |
| Normalized MAD Burst Spike    | 59                 | 22              | 25                 | 38               |
| Median/Mean ISI               | 101                | 76              | 70                 | 89               |
| Median ISI                    | 67                 | 32              | 37                 | 76               |

**Supplementary Table S6:** Heatmap of bicuculline from MEA recordings from rat cortical neurons showing % changes versus vehicle in each parameter. Green color indicates an increase in a parameter, red color indicates a decrease. A value of 100% corresponds to no change from vehicle (pure white color). The intensity of the color in a box increases with the magnitude of the change. Statistically significant values compared to vehicle are indicated in bold.



| Subunit | Species                | Sequence ID | Database | Date accessed |
|---------|------------------------|-------------|----------|---------------|
| GABRA1  | Homo sapiens           | P14867      | UniProt  | 11.04.2022    |
| GABRA1  | Pan paniscus           | A0A2R9AU65  | UniProt  | 11.04.2022    |
| GABRA1  | Mustela putorius furo  | M3YP62      | UniProt  | 11.04.2022    |
| GABRA1  | Rattus norvegicus      | P62813      | UniProt  | 11.04.2022    |
| GABRA1  | Mus musculus           | P62812      | UniProt  | 11.04.2022    |
| GABRA1  | Canis lupus familiaris | E2RSP8      | UniProt  | 11.04.2022    |
| GABRA1  | Pan troglodytes        | A0A2I3SDV7  | UniProt  | 11.04.2022    |
| GABRA1  | Danio rerio            | Q08BJ3      | UniProt  | 11.04.2022    |
| GABRA1  | Macaca mulatta         | A0A1D5Q406  | UniProt  | 11.04.2022    |
| GABRA1  | Bos taurus             | P08219      | UniProt  | 11.04.2022    |

|        |                       |                |              |            |
|--------|-----------------------|----------------|--------------|------------|
| GABRA2 | Homo sapiens          | P47869         | UniProt      | 11.04.2022 |
| GABRA2 | Pan paniscus          | XP_003816076.1 | NCBI Protein | 11.04.2022 |
| GABRA2 | Mustela putorius furo | M3Y0V9         | UniProt      | 11.04.2022 |
| GABRA2 | Rattus norvegicus     | P23576         | UniProt      | 11.04.2022 |
| GABRA2 | Mus musculus          | P26048         | UniProt      | 11.04.2022 |

|         |                        |                |              |            |
|---------|------------------------|----------------|--------------|------------|
| GABRA2  | Canis lupus familiaris | A0A5F4CYJ7     | UniProt      | 11.04.2022 |
| GABRA2  | Pan troglodytes        | H2QPE5         | UniProt      | 11.04.2022 |
| GABRA2a | Danio rerio            | E7F635         | UniProt      | 11.04.2022 |
| GABRA2  | Macaca mulatta         | XP_028703913.1 | NCBI Protein | 11.04.2022 |
| GABRA2  | Bos taurus             | P10063         | UniProt      | 11.04.2022 |

|        |                        |            |         |            |
|--------|------------------------|------------|---------|------------|
| GABRA3 | Homo sapiens           | P34903     | UniProt | 11.04.2022 |
| GABRA3 | Pan paniscus           | A0A2R9AHX2 | UniProt | 11.04.2022 |
| GABRA3 | Mustela putorius furo  | M3YJX4     | UniProt | 11.04.2022 |
| GABRA3 | Rattus norvegicus      | P20236     | UniProt | 11.04.2022 |
| GABRA3 | Mus musculus           | P26049     | UniProt | 11.04.2022 |
| GABRA3 | Canis lupus familiaris | E2QVJ7     | UniProt | 11.04.2022 |
| GABRA3 | Pan troglodytes        | H2QZ88     | UniProt | 11.04.2022 |
| GABRA3 | Danio rerio            | A0A2R8QC15 | UniProt | 11.04.2022 |
| GABRA3 | Macaca mulatta         | F7G8R5     | UniProt | 11.04.2022 |
| GABRA3 | Bos taurus             | P10064     | UniProt | 11.04.2022 |

|        |                        |            |         |            |
|--------|------------------------|------------|---------|------------|
| GABRA4 | Homo sapiens           | P48169     | UniProt | 11.04.2022 |
| GABRA4 | Pan paniscus           | A0A2R9C6M3 | UniProt | 11.04.2022 |
| GABRA4 | Mustela putorius furo  | M3Y0X5     | UniProt | 11.04.2022 |
| GABRA4 | Rattus norvegicus      | P28471     | UniProt | 11.04.2022 |
| GABRA4 | Mus musculus           | Q9D6F4     | UniProt | 11.04.2022 |
| GABRA4 | Canis lupus familiaris | F1P9P9     | UniProt | 11.04.2022 |
| GABRA4 | Pan troglodytes        | H2QPE7     | UniProt | 11.04.2022 |
| GABRA4 | Danio rerio            | Q568M9     | UniProt | 11.04.2022 |
| GABRA4 | Macaca mulatta         | F6YLN4     | UniProt | 11.04.2022 |
| GABRA4 | Bos taurus             | P20237     | UniProt | 11.04.2022 |

|        |                        |            |         |            |
|--------|------------------------|------------|---------|------------|
| GABRA5 | Homo sapiens           | P31644     | UniProt | 11.04.2022 |
| GABRA5 | Pan paniscus           | A0A2R9BFW8 | UniProt | 11.04.2022 |
| GABRA5 | Mustela putorius furo  | M3XNJ0     | UniProt | 11.04.2022 |
| GABRA5 | Rattus norvegicus      | P19969     | UniProt | 11.04.2022 |
| GABRA5 | Mus musculus           | Q8BHJ7     | UniProt | 11.04.2022 |
| GABRA5 | Canis lupus familiaris | E2RG38     | UniProt | 11.04.2022 |

|        |                 |        |         |            |
|--------|-----------------|--------|---------|------------|
| GABRA5 | Pan troglodytes | H2Q919 | UniProt | 11.04.2022 |
| GABRA5 | Danio rerio     | E9QE70 | UniProt | 11.04.2022 |
| GABRA5 | Macaca mulatta  | G7MW76 | UniProt | 11.04.2022 |
| GABRA5 | Bos taurus      | Q08E50 | UniProt | 11.04.2022 |

|         |                        |            |         |            |
|---------|------------------------|------------|---------|------------|
| GABRA6  | Homo sapiens           | Q16445     | UniProt | 11.04.2022 |
| GABRA6  | Pan paniscus           | A0A2R8ZQ75 | UniProt | 11.04.2022 |
| GABRA6  | Mustela putorius furo  | M3YP65     | UniProt | 11.04.2022 |
| GABRA6  | Rattus norvegicus      | P30191     | UniProt | 11.04.2022 |
| GABRA6  | Mus musculus           | P16305     | UniProt | 11.04.2022 |
| GABRA6  | Canis lupus familiaris | E2RSN3     | UniProt | 11.04.2022 |
| GABRA6  | Pan troglodytes        | H2QRY3     | UniProt | 11.04.2022 |
| GABRA6b | Danio rerio            | F1QGW0     | UniProt | 11.04.2022 |
| GABRA6  | Macaca mulatta         | A0A1D5RL15 | UniProt | 11.04.2022 |
| GABRA6  | Bos taurus             | E1BE96     | UniProt | 11.04.2022 |

|        |              |        |         |            |
|--------|--------------|--------|---------|------------|
| GABRB1 | Homo sapiens | P18505 | UniProt | 11.04.2022 |
|--------|--------------|--------|---------|------------|

|        |                        |            |         |            |
|--------|------------------------|------------|---------|------------|
| GABRB1 | Pan paniscus           | A0A2R9C4H8 | UniProt | 11.04.2022 |
| GABRB1 | Mustela putorius furo  | M3Y0Y5     | UniProt | 11.04.2022 |
| GABRB1 | Rattus norvegicus      | P15431     | UniProt | 11.04.2022 |
| GABRB1 | Mus musculus           | P50571     | UniProt | 11.04.2022 |
| GABRB1 | Canis lupus familiaris | F1PEG2     | UniProt | 11.04.2022 |
| GABRB1 | Pan troglodytes        | H2QPE8     | UniProt | 11.04.2022 |
| GABRB1 | Danio rerio            | F1QPW7     | UniProt | 11.04.2022 |
| GABRB1 | Macaca mulatta         | G7MSU9     | UniProt | 11.04.2022 |
| GABRB1 | Bos taurus             | P08220     | UniProt | 11.04.2022 |

|        |                        |            |         |            |
|--------|------------------------|------------|---------|------------|
| GABRB2 | Homo sapiens           | P47870     | UniProt | 11.04.2022 |
| GABRB2 | Pan paniscus           | A0A2R9C8C8 | UniProt | 11.04.2022 |
| GABRB2 | Mustela putorius furo  | M3YP67     | UniProt | 11.04.2022 |
| GABRB2 | Rattus norvegicus      | P63138     | UniProt | 11.04.2022 |
| GABRB2 | Mus musculus           | P63137     | UniProt | 11.04.2022 |
| GABRB2 | Canis lupus familiaris | A0A5F4CKV8 | UniProt | 11.04.2022 |
| GABRB2 | Pan troglodytes        | A0A2J8NKG3 | UniProt | 11.04.2022 |

|        |                |        |         |            |
|--------|----------------|--------|---------|------------|
| GABRB2 | Danio rerio    | Q9DDD9 | UniProt | 11.04.2022 |
| GABRB2 | Macaca mulatta | D1LYT2 | UniProt | 11.04.2022 |
| GABRB2 | Bos taurus     | P0C2W5 | UniProt | 11.04.2022 |

|        |                        |            |         |            |
|--------|------------------------|------------|---------|------------|
| GABRB3 | Homo sapiens           | P28472     | UniProt | 11.04.2022 |
| GABRB3 | Pan paniscus           | A0A2R9BWE5 | UniProt | 11.04.2022 |
| GABRB3 | Mustela putorius furo  | M3XNI6     | UniProt | 11.04.2022 |
| GABRB3 | Rattus norvegicus      | P63079     | UniProt | 11.04.2022 |
| GABRB3 | Mus musculus           | P63080     | UniProt | 11.04.2022 |
| GABRB3 | Canis lupus familiaris | J9P3X1     | UniProt | 11.04.2022 |
| GABRB3 | Pan troglodytes        | A0A2I3THQ1 | UniProt | 11.04.2022 |
| GABRB3 | Danio rerio            | A0A0R4ILP2 | UniProt | 11.04.2022 |
| GABRB3 | Macaca mulatta         | F6ZKJ4     | UniProt | 11.04.2022 |
| GABRB3 | Bos taurus             | A5D7U6     | UniProt | 11.04.2022 |

|       |              |            |         |            |
|-------|--------------|------------|---------|------------|
| GABRD | Homo sapiens | O14764     | UniProt | 11.04.2022 |
| GABRD | Pan paniscus | A0A2R9B726 | UniProt | 11.04.2022 |

|       |                               |                |              |            |
|-------|-------------------------------|----------------|--------------|------------|
| GABRD | <i>Mustela putorius furo</i>  | XP_004768807.1 | NCBI Protein | 11.04.2022 |
| GABRD | <i>Rattus norvegicus</i>      | P18506         | UniProt      | 11.04.2022 |
| GABRD | <i>Mus musculus</i>           | P22933         | UniProt      | 11.04.2022 |
| GABRD | <i>Canis lupus familiaris</i> | E2R3M6         | UniProt      | 11.04.2022 |
| GABRD | <i>Pan troglodytes</i>        | A0A2J8K8J4     | UniProt      | 11.04.2022 |
| GABRD | <i>Danio rerio</i>            | E9QHL0         | UniProt      | 11.04.2022 |
| GABRD | <i>Macaca mulatta</i>         | F6QDC4         | UniProt      | 11.04.2022 |
| GABRD | <i>Bos taurus</i>             | A0A3Q1LQH4     | UniProt      | 11.04.2022 |

|       |                               |            |         |            |
|-------|-------------------------------|------------|---------|------------|
| GABRE | <i>Homo sapiens</i>           | P78334     | UniProt | 11.04.2022 |
| GABRE | <i>Pan paniscus</i>           | A0A2R8ZSJ9 | UniProt | 11.04.2022 |
| GABRE | <i>Mustela putorius furo</i>  | M3YJW6     | UniProt | 11.04.2022 |
| GABRE | <i>Rattus norvegicus</i>      | Q9ES14     | UniProt | 11.04.2022 |
| GABRE | <i>Mus musculus</i>           | Q9JLE8     | UniProt | 11.04.2022 |
| GABRE | <i>Canis lupus familiaris</i> | E2QVM5     | UniProt | 11.04.2022 |
| GABRE | <i>Pan troglodytes</i>        | H2QZ86     | UniProt | 11.04.2022 |
| -     | <i>Danio rerio</i>            | -          | -       | -          |

|       |                |        |         |            |
|-------|----------------|--------|---------|------------|
| GABRE | Macaca mulatta | F7GJ80 | UniProt | 11.04.2022 |
| GABRE | Bos taurus     | G3MWU9 | UniProt | 11.04.2022 |

|        |                        |            |         |            |
|--------|------------------------|------------|---------|------------|
| GABRG1 | Homo sapiens           | Q8N1C3     | UniProt | 11.04.2022 |
| GABRG1 | Pan paniscus           | A0A2R9A1L5 | UniProt | 11.04.2022 |
| GABRG1 | Mustela putorius furo  | M3Y0V1     | UniProt | 11.04.2022 |
| GABRG1 | Rattus norvegicus      | P23574     | UniProt | 11.04.2022 |
| GABRG1 | Mus musculus           | Q9R0Y8     | UniProt | 11.04.2022 |
| GABRG1 | Canis lupus familiaris | E2RH22     | UniProt | 11.04.2022 |
| GABRG1 | Pan troglodytes        | H2QPE4     | UniProt | 11.04.2022 |
| GABRG1 | Danio rerio            | A0A0R4IPF9 | UniProt | 11.04.2022 |
| GABRG1 | Macaca mulatta         | A0A5F8A0N7 | UniProt | 11.04.2022 |
| GABRG1 | Bos taurus             | F6Q4V7     | UniProt | 11.04.2022 |

|        |                       |                |              |            |
|--------|-----------------------|----------------|--------------|------------|
| GABRG2 | Homo sapiens          | P18507-2       | UniProt      | 11.04.2022 |
| GABRG2 | Pan paniscus          | A0A2R9CM76     | UniProt      | 11.04.2022 |
| GABRG2 | Mustela putorius furo | XP_004737727.1 | NCBI Protein | 11.04.2022 |



|        |                        |                |              |            |
|--------|------------------------|----------------|--------------|------------|
| GABRG2 | Rattus norvegicus      | NP_001380704.1 | NCBI Protein | 11.04.2022 |
| GABRG2 | Mus musculus           | P22723         | UniProt      | 11.04.2022 |
| GABRG2 | Canis lupus familiaris | E2RSQ1         | UniProt      | 11.04.2022 |
| GABRG2 | Pan troglodytes        | A0A2I3RPH6     | UniProt      | 11.04.2022 |
| GABRG2 | Danio rerio            | F1RDP2         | UniProt      | 11.04.2022 |
| GABRG2 | Macaca mulatta         | F7A3C2         | UniProt      | 11.04.2022 |
| GABRG2 | Bos taurus             | P22300         | UniProt      | 11.04.2022 |

|        |                        |                |              |            |
|--------|------------------------|----------------|--------------|------------|
| GABRG3 | Homo sapiens           | Q99928         | UniProt      | 11.04.2022 |
| GABRG3 | Pan paniscus           | A0A2R9BD98     | UniProt      | 11.04.2022 |
| GABRG3 | Mustela putorius furo  | XP_044926358.1 | NCBI Protein | 11.04.2022 |
| GABRG3 | Rattus norvegicus      | P28473         | UniProt      | 11.04.2022 |
| GABRG3 | Mus musculus           | P27681         | UniProt      | 11.04.2022 |
| GABRG3 | Canis lupus familiaris | F1PHI6         | UniProt      | 11.04.2022 |
| GABRG3 | Pan troglodytes        | A0A2I3TTK9     | UniProt      | 11.04.2022 |
| GABRG3 | Danio rerio            | XP_009300843.1 | NCBI Protein | 11.04.2022 |

|        |                |                |              |            |
|--------|----------------|----------------|--------------|------------|
| GABRG3 | Macaca mulatta | F7HI54         | UniProt      | 11.04.2022 |
| GABRG3 | Bos taurus     | XP_024838027.1 | NCBI Protein | 11.04.2022 |

|       |                        |                |              |            |
|-------|------------------------|----------------|--------------|------------|
| GABRP | Homo sapiens           | O00591         | UniProt      | 11.04.2022 |
| GABRP | Pan paniscus           | A0A2R8ZJ77     | UniProt      | 11.04.2022 |
| GABRP | Mustela putorius furo  | M3YN80         | UniProt      | 11.04.2022 |
| GABRP | Rattus norvegicus      | O09028         | UniProt      | 11.04.2022 |
| GABRP | Mus musculus           | Q8QZW7         | UniProt      | 11.04.2022 |
| GABRP | Canis lupus familiaris | E2RS87         | UniProt      | 11.04.2022 |
| GABRP | Pan troglodytes        | A0A2J8LXV6     | UniProt      | 11.04.2022 |
| GABRP | Danio rerio            | XP_021330000.1 | NCBI Protein | 11.04.2022 |
| GABRP | Macaca mulatta         | A0A1D5QJZ6     | UniProt      | 11.04.2022 |
| GABRP | Bos taurus             | Q5EA06         | UniProt      | 11.04.2022 |

|       |                       |            |         |            |
|-------|-----------------------|------------|---------|------------|
| GABRQ | Homo sapiens          | Q9UN88     | UniProt | 11.04.2022 |
| GABRQ | Pan paniscus          | A0A2R9ALH2 | UniProt | 11.04.2022 |
| GABRQ | Mustela putorius furo | M3YJY6     | UniProt | 11.04.2022 |

|        |                        |            |         |            |
|--------|------------------------|------------|---------|------------|
| GABRQ  | Rattus norvegicus      | G3V875     | UniProt | 11.04.2022 |
| GABRQ  | Mus musculus           | Q9JLF1     | UniProt | 11.04.2022 |
| GABRQ  | Canis lupus familiaris | F6XRX3     | UniProt | 11.04.2022 |
| GABRQ  | Pan troglodytes        | A0A6D2XHJ7 | UniProt | 11.04.2022 |
| GABRB4 | Danio rerio            | F1Q4Y6     | UniProt | 11.04.2022 |
| GABRQ  | Macaca mulatta         | F7F4H9     | UniProt | 11.04.2022 |
| GABRQ  | Bos taurus             | E1BJH4     | UniProt | 11.04.2022 |

|        |                        |                |              |            |
|--------|------------------------|----------------|--------------|------------|
| GABRR1 | Homo sapiens           | P24046         | UniProt      | 11.04.2022 |
| GABRR1 | Pan paniscus           | A0A2R9BL98     | UniProt      | 11.04.2022 |
| GABRR1 | Mustela putorius furo  | M3YD49         | UniProt      | 11.04.2022 |
| GABRR1 | Rattus norvegicus      | P50572         | UniProt      | 11.04.2022 |
| GABRR1 | Mus musculus           | P56475         | UniProt      | 11.04.2022 |
| GABRR1 | Canis lupus familiaris | XP_038538749.1 | NCBI Protein | 11.04.2022 |
| GABRR1 | Pan troglodytes        | H2QTE3         | UniProt      | 11.04.2022 |
| GABRR1 | Danio rerio            | Q5TZ16         | UniProt      | 11.04.2022 |

|        |                |        |         |            |
|--------|----------------|--------|---------|------------|
| GABRR1 | Macaca mulatta | F6W0N4 | UniProt | 11.04.2022 |
| GABRR1 | Bos taurus     | Q0II76 | UniProt | 11.04.2022 |

|         |                        |                |              |            |
|---------|------------------------|----------------|--------------|------------|
| GABRR2  | Homo sapiens           | P28476         | UniProt      | 11.04.2022 |
| GABRR2  | Pan paniscus           | A0A2R9AXF6     | UniProt      | 11.04.2022 |
| GABRR2  | Mustela putorius furo  | M3YCV9         | UniProt      | 11.04.2022 |
| GABRR2  | Rattus norvegicus      | P47742         | UniProt      | 11.04.2022 |
| GABRR2  | Mus musculus           | P56476         | UniProt      | 11.04.2022 |
| GABRR2  | Canis lupus familiaris | E2R4R0         | UniProt      | 11.04.2022 |
| GABRR2  | Pan troglodytes        | XP_527448.5    | NCBI Protein | 11.04.2022 |
| GABRR2a | Danio rerio            | F1QX34         | UniProt      | 11.04.2022 |
| GABRR2  | Macaca mulatta         | XP_001095465.3 | NCBI Protein | 11.04.2022 |
| GABRR2  | Bos taurus             | Q0II76         | UniProt      | 11.04.2022 |

|        |                       |            |         |            |
|--------|-----------------------|------------|---------|------------|
| GABRR3 | Homo sapiens          | A8MPY1     | UniProt | 11.04.2022 |
| GABRR3 | Pan paniscus          | A0A2R9BJ01 | UniProt | 11.04.2022 |
| GABRR3 | Mustela putorius furo | M3XTX4     | UniProt | 11.04.2022 |

|         |                        |            |         |            |
|---------|------------------------|------------|---------|------------|
| GABRR3  | Rattus norvegicus      | P50573     | UniProt | 11.04.2022 |
| GABRR3  | Mus musculus           | B2RXA8     | UniProt | 11.04.2022 |
| GABRR3  | Canis lupus familiaris | -          | -       | -          |
| GABRR3  | Pan troglodytes        | A0A2J8MY57 | UniProt | 11.04.2022 |
| GABRR3a | Danio rerio            | B3DIE5     | UniProt | 11.04.2022 |
| GABRR3  | Macaca mulatta         | F6YLK3     | UniProt | 11.04.2022 |
| GABRR3  | Bos taurus             | E1B988     | UniProt | 11.04.2022 |

**Supplementary Table S7:** All sources (subunit, sequence ID, database) of protein sequences used for the alignments of all species in different coloured groups (all alpha subunits, all beta subunits, etc).

## References

- Bocquet N, Nury H, Baaden M, Le Poupon C, Changeux J-P, Delarue M, *et al.* (2009). X-ray structure of a pentameric ligand-gated ion channel in an apparently open conformation. *Nature* **457**(7225): 111-114.
- Chen Q, Wells MM, Arjunan P, Tillman TS, Cohen AE, Xu Y, *et al.* (2018). Structural basis of neurosteroid anesthetic action on GABAA receptors. *Nature communications* **9**(1): 3972.
- Fourati Z, Howard RJ, Heusser SA, Hu H, Ruza RR, Sauguet L, *et al.* (2018). Structural Basis for a Bimodal Allosteric Mechanism of General Anesthetic Modulation in Pentameric Ligand-Gated Ion Channels. *Cell Reports* **23**(4): 993-1004.
- Hénault CM, Govaerts C, Spurny R, Brams M, Estrada-Mondragon A, Lynch J, *et al.* (2019). A lipid site shapes the agonist response of a pentameric ligand-gated ion channel. *Nature chemical biology* **15**(12): 1156-1164.
- Huang X, Chen H, Shaffer PL (2017). Crystal Structures of Human GlyR $\alpha$ 3 Bound to Ivermectin. *Structure (London, England : 1993)* **25**(6): 945-950.e942.
- Kasaragod VB, Mortensen M, Hardwick SW, Wahid AA, Dorovykh V, Chirgadze DY, *et al.* (2022). Mechanisms of inhibition and activation of extrasynaptic  $\alpha\beta$  GABAA receptors. *Nature* **602**(7897): 529-533.
- Khaleel MA, Khan AH, Ghadzi SM, Adnan AS, Abdallah QM (2022). A Standardized Dataset of a Spontaneous Adverse Event Reporting System. In: *Healthcare* Vol. 10.
- Kim JJ, Gharpure A, Teng J, Zhuang Y, Howard RJ, Zhu S, *et al.* (2020). Shared structural mechanisms of general anaesthetics and benzodiazepines. *Nature* **585**(7824): 303-308.
- Lavery D, Thomas P, Field M, Andersen OJ, Gold MG, Biggin PC, *et al.* (2017). Crystal structures of a GABAA-receptor chimera reveal new endogenous neurosteroid-binding sites. *Nature structural & molecular biology*.
- Liu S, Xu L, Guan F, Liu Y-T, Cui Y, Zhang Q, *et al.* (2018). Cryo-EM structure of the human  $\alpha 5\beta 3$  GABAA receptor. *Cell Research* **28**(9): 958-961.
- Masiulis S, Desai R, Uchański T, Serna Martin I, Lavery D, Karia D, *et al.* (2019). GABAA receptor signalling mechanisms revealed by structural pharmacology. *Nature*.
- Miller PS, Aricescu AR (2014). Crystal structure of a human GABAA receptor. *Nature* **512**(7514): 270-275.
- Miller PS, Scott S, Masiulis S, De Colibus L, Pardon E (2017). Structural basis for GABAA receptor potentiation by neurosteroids. **24**(11): 986-992.
- Nury H, Van Renterghem C, Weng Y, Tran A, Baaden M, Dufresne V, *et al.* (2011). X-ray structures of general anaesthetics bound to a pentameric ligand-gated ion channel. *Nature* **469**(7330): 428-431.
- Nys M, Wijckmans E, Farinha A, Yoluk O, Andersson M, Brams M, *et al.* (2016). Allosteric binding site in a Cys-loop receptor ligand-binding domain unveiled in the crystal structure of ELIC in complex with chlorpromazine. *Proceedings of the National Academy of Sciences of the United States of America* **113**(43): E6696-e6703.

Pan J, Chen Q, Willenbring D, Mowrey D, Kong X-P, Cohen A, *et al.* (2012). Structure of the Pentameric Ligand-Gated Ion Channel GLIC Bound with Anesthetic Ketamine. *Structure (London, England : 1993)* **20**(9): 1463-1469.

Phulera S, Zhu H (2018). Cryo-EM structure of the benzodiazepine-sensitive alpha1beta1gamma2S tri-heteromeric GABAA receptor in complex with GABA. **7**.

Puthenkalam R, Hieckel M, Simeone X, Suwattanasophon C, Feldbauer RV, Ecker GF, *et al.* (2016). Structural Studies of GABA-A receptor binding sites: Which experimental structure tells us what? *Frontiers in Molecular Neuroscience* **9**.

Sauguet L, Howard RJ, Malherbe L, Lee US, Corringier P-J, Adron Harris R, *et al.* (2013). Structural basis for potentiation by alcohols and anaesthetics in a ligand-gated ion channel. *Nature communications* **4**(1): 1697.

Sente A, Desai R, Naydenova K, Malinauskas T, Jounaidi Y, Miehling J, *et al.* (2022). Differential assembly diversifies GABAA receptor structures and signalling. *Nature* **604**(7904): 190-194.

Spurny R, Billen B, Howard RJ, Brams M, Debaveye S, Price KL, *et al.* (2013). Multisite Binding of a General Anesthetic to the Prokaryotic Pentameric *Erwinia chrysanthemi* Ligand-gated Ion Channel (ELIC) \*. *Journal of Biological Chemistry* **288**(12): 8355-8364.

Spurny R, Debaveye S, Farinha A, Veys K, Vos AM, Gossas T, *et al.* (2015). Molecular blueprint of allosteric binding sites in a homologue of the agonist-binding domain of the  $\alpha 7$  nicotinic acetylcholine receptor. *Proceedings of the National Academy of Sciences* **112**(19): E2543-E2552.

Uchański T, Masiulis S, Fischer B, Kalichuk V, López-Sánchez U, Zarkadas E, *et al.* (2021). Megabodies expand the nanobody toolkit for protein structure determination by single-particle cryo-EM. *Nature Methods* **18**(1): 60-68.

Ulens C, Spurny R, Thompson Andrew J, Alqazzaz M, Debaveye S, Han L, *et al.* (2014). The Prokaryote Ligand-Gated Ion Channel ELIC Captured in a Pore Blocker-Bound Conformation by the Alzheimer's Disease Drug Memantine. *Structure (London, England : 1993)* **22**(10): 1399-1407.

Zhu S, Noviello CM, Teng J, Walsh RM, Kim JJ, Hibbs RE (2018). Structure of a human synaptic GABAA receptor. *Nature* **559**(7712): 67-72.

Zhu S, Sridhar A, Teng J, Howard RJ, Lindahl E, Hibbs RE (2022). Structural and dynamic mechanisms of GABAA receptor modulators with opposing activities. *Nature communications* **13**(1): 4582.

Zimmermann I, Marabelli A, Bertozzi C, Sivilotti LG, Dutzler R (2012). Inhibition of the Prokaryotic Pentameric Ligand-Gated Ion Channel ELIC by Divalent Cations. *PLOS Biology* **10**(11): e1001429.
